1 **Daily rewiring of a neural circuit generates a predictive model of environmental light**

2

3 Bryan J. Song<sup>1</sup>, Slater J. Sharp<sup>1</sup>, Dragana Rogulja<sup>1,2,\*</sup>

4 <sup>1</sup>Department of Neurobiology, Harvard Medical School, Boston, MA 02115

5 \*Correspondence to: [Dragana\\_Rogulja@hms.harvard.edu](mailto:Dragana_Rogulja@hms.harvard.edu)

6

7

8 **Ongoing sensations are compared to internal, experience-based, reference models;**  
9 **mismatch between reality and expectation can signal opportunity or danger, and can**  
10 **shape behavior. The nature of internal reference models is largely unknown. We describe**  
11 **a model that enables moment-to-moment luminance evaluation in flies. Abrupt shifts to**  
12 **lighting conditions inconsistent with the subjective time-of-day trigger locomotion,**  
13 **whereas shifts to appropriate conditions induce quiescence. The time-of-day prediction**  
14 **is generated by a slowly shifting activity balance between opposing neuronal**  
15 **populations, LNvs and DN1as. The two populations undergo structural changes in axon**  
16 **length that accord with, and are required for, conveying time-of-day information. Each**  
17 **day, in each population, the circadian clock directs cellular remodeling such that the**  
18 **maximum axonal length in one population coincides with the minimum in the other;**  
19 **preventing remodeling prevents transitioning between opposing internal states. We**  
20 **propose that a dynamic predictive model resides in the shifting connectivities of the LNv-**  
21 **DN1a circuit.**

22

23 The brain assigns valence to incoming sensory stimuli, allowing responsiveness to be context-  
24 dependent. To do this, it must continually check ongoing sensations against expectations, an  
25 idea known as predictive coding<sup>1</sup>. Discrepancy between expected and actual outcomes is  
26 famously reflected in the activity of dopaminergic neurons<sup>2</sup>, which have been proposed to  
27 encode reward prediction error<sup>3</sup>. The mechanisms that give rise to this integrated signal are not  
28 yet understood. It has been theorized that dopaminergic neurons are a point of convergence  
29 between ongoing sensory signals and expectations generated from prior outcomes<sup>1</sup>. In order to  
30 understand the computations underlying predictive coding, it is necessary to identify the sensory  
31 and predictive information streams that are integrated by downstream comparators. While  
32 sensory circuits have been successfully mapped in many systems, the representation of  
33 expectations in the brain remains largely unknown.

34

35 Predictable schedules enable planning for future events. Biological mechanisms have evolved  
36 to take cues from regular environmental fluctuations and organizing preparatory physiological  
37 and behavioral processes. For example, anticipating nightfall means seeking food and shelter  
38 before sundown. This is made possible by circadian clocks, conserved molecular oscillators that  
39 operate on a ~24 hour schedule<sup>4</sup> and are entrained by rhythmic cues such as daily cycles of  
40 light<sup>5</sup> or temperature<sup>6</sup>. Under normal light-cycling conditions, the progression of daytime and  
41 nighttime is tracked by the rise and fall of key circadian clock proteins<sup>7</sup>. When external cues are  
42 removed (animals are put into constant darkness), molecular clocks continue to cycle<sup>7</sup>. These  
43 clocks give proper timing to rhythmic processes such as sleeping and feeding<sup>8</sup>, but there is no  
44 evidence that they are used moment-to-moment to assess conditions in the environment. We  
45 show that the circadian system assists in prediction evaluation, and describe a mechanism by  
46 which it does this: a microcircuit within the network of circadian neurons uses cellular  
47 remodeling as a strategy to organize slowly shifting internal predictions. The experimental  
48 paradigm we established provides a new way to study how expectations are encoded and  
49 evaluated.

50

## 51 **Results**

### 52 **Locomotor reactivity to light depends on time-of-day**

53 We used a protocol similar to Lu et al<sup>9</sup>, where flies experienced light and darkness alternating  
54 every 12 hours for several days (mimicking daytime and nighttime) before spending at least 24  
55 hours in darkness. They were then exposed to light for an hour at different times of day (**Fig.**  
56 **1a**). When light was presented during the nighttime, wild-type<sup>10</sup> flies immediately increased  
57 locomotion (startle, **Fig. 1a,b** and **Extended Data Video 1**). During subjective daytime (daytime,  
58 but in darkness) their reaction was the opposite – they immediately slowed down or stopped  
59 moving (**Fig. 1a,b** and **Extended Data Video 1**). The difference in baseline locomotion  
60 (**Extended Data Fig. 1a**) does not explain differential responsiveness between day and night,  
61 based on the following: locomotion was similar at 8pm and 8am, but diverged when lights turned  
62 on (**Fig. 1b**); responsiveness in individuals showed no correlation with baseline locomotion, and  
63 weak correlation with sleep status (**Extended Data Fig. 1a,b**); normalizing light-evoked  
64 locomotion to baseline did not change the results (**Extended Data Fig. 1c**). Though males  
65 generally sleep during the day while females do not<sup>11</sup>, both sexes responded to daytime light by  
66 decreasing activity (**Fig. 1a,b**; **Extended Data Fig. 2a,b**).

67

68 Two opposing states of responsiveness lasted ~12 hours each (**Fig. 1c**), correlating with the  
69 schedule of light and darkness previously experienced during entrainment. To test whether  
70 time-of-day light responses are indeed instructed by prior experience, we entrained flies to  
71 shortened or lengthened light schedules (**Extended Data Fig. 3a**). At the same hour (7pm), a  
72 light pulse either suppressed or evoked locomotor activity, depending on whether light had been  
73 on at 7pm during entrainment (**Extended Data Fig. 3b-f**). Locomotion always seemed triggered  
74 by subjective mismatch (i.e. experiencing different conditions than expected at that time of day).  
75 In support of this idea, startle was evoked not only by nighttime light (**Fig. 1a-c**), but also by  
76 daytime darkness (**Extended Data Fig. 3g,h**). Locomotor reactivity to light pulses therefore  
77 reports internal estimates of daytime vs nighttime with moment-to-moment resolution (**Fig. 1d**).

78

### 79 **Circadian clocks contextualize environmental light**

80 Based on the timescales involved, we suspected the involvement of circadian clocks, molecular  
81 programs that are entrained by environmental cues and that organize daily rhythms in  
82 physiology and behavior<sup>12</sup>. When core clock proteins Clock<sup>12</sup> or Period<sup>13-15</sup> (Per) were depleted  
83 from the network of ~150 circadian neurons<sup>16,17</sup> (**Fig. 1e, Extended Data Fig. 4a-d**), flies lost  
84 the ability to contextualize light relative to time of day. Instead, they always responded with a  
85 startle – but this startle was weak relative to the nighttime startle in controls (**Fig. 1f,g**). The  
86 implication is that the circadian system bidirectionally modifies a stereotyped behavioral  
87 response to an abrupt change in luminance - during daytime (when light is appropriate) clocks  
88 suppress the startle, but they enhance it during nighttime (when light is inappropriate (**Fig. 1h**)).  
89 Predictions originate from molecular clock oscillations, as mutants with faster clocks<sup>13</sup> cycled  
90 through light-responsive states faster (**Extended Data Fig. 5a,b** and **Extended Data Table 2**).

91

### 92 **Separate clock neuron subpopulations contextualize daytime and nighttime light**

93 To find the neuronal mechanism that organizes predictions about environmental light, we first  
94 examined LNvs<sup>12</sup> (**Fig. 2a,b**). This small group of neurons regulates normal locomotor activity  
95 rhythms (i.e. the pattern of activity seen under basal conditions, where periods of high and low  
96 activity occur at predictable times of day)<sup>18</sup>. Using the green-light-gated chloride channel  
97 GtACR1<sup>19</sup>, we silenced LNvs conditionally, avoiding potential developmental artifacts (Methods).  
98 Here light served as both a visual stimulus and effector for GtACR1. LNV silencing caused flies  
99 to startle in response to light during subjective daytime (**Fig. 2c**), as if they no longer held the  
100 expectation that light during the daytime is appropriate – mimicking the daytime phenotype of  
101 flies lacking clocks entirely (**Fig. 1g**). The near-instantaneous nature of optogenetics allows us

102 to conclude that LNvs contextualize daytime light on a moment-by-moment basis. Surprisingly,  
103 unlike general clock disruption (**Fig. 1g**), LNv silencing produced no nighttime phenotype (**Fig.**  
104 **2c**). Daytime-specific phenotypes were also seen with RNAi-mediated depletion of the LNv-  
105 specific neuropeptide Pigment Dispersing Factor<sup>20</sup> (PDF, **Extended Data Fig. 6a**), and with  
106 hypomorphic mutations in the PDF receptor (PDFR)<sup>21</sup> (**Extended Data Fig. 6b,c**). Though  
107 knocking down PDF in the small LNv subpopulation<sup>20</sup> (**Extended Data Fig. 7a,b,d**) was  
108 sufficient to disrupt daytime light responsiveness (**Extended Data Fig. 7c,e**), the phenotype  
109 was stronger when the small and large LNvs were manipulated simultaneously (**Extended Data**  
110 **Fig. 6a**), so we treated them as a unit.

111  
112 Because LNvs are considered to be a central pacemaker<sup>18</sup>, a reasonable concern is that LNv-  
113 disrupted flies lack circadian rhythms entirely. Several lines of evidence argue for specific,  
114 rather than general, loss of clock function. First, LNvs silencing did not affect nighttime  
115 responsiveness to light (**Fig. 2c, Extended Data Fig. 6a**), unlike when the entire clock network  
116 was disabled (**Fig. 1g**). Second, the arrhythmic phenotypes of LNv disruption have been argued  
117 to stem from developmental problems<sup>22</sup>, which are avoided with conditional optogenetics. Third,  
118 it takes many days for LNv silencing to cause arrhythmicity - most animals are rhythmic during  
119 the first two days of constant darkness<sup>18</sup> (**Extended Data Table 2**), which is when our testing is  
120 done. Finally, other subpopulations can support timekeeping in the absence of LNv function<sup>22</sup>.  
121 We conclude that LNvs signal that light is appropriate during daytime but are dispensable for  
122 contextualizing light during nighttime.

123  
124 LNv silencing recapitulates only the daytime phenotype of clock disruption, suggesting that  
125 other populations might have analogous function during the nighttime. Since LNvs signal  
126 through the peptide PDF, we looked for their targets by restoring expression of the PDF  
127 receptor to various neuronal populations in the receptor mutants (**Fig. 2d, Extended Data Fig.**  
128 **8a**). For this *pdfR* rescue screen, we predominantly tested Gal4 lines expressed sparsely in the  
129 nervous system, and also looked at lines expressed in sleep- and locomotion-regulating  
130 centers, circadian subpopulations, and neurons expressing specific neurotransmitters or  
131 peptides (**Extended Data Table 3**). Restoring PDFR to most neuronal populations, including  
132 known LNv targets<sup>23-25</sup>, could not fully suppress the *pdfR* mutant phenotype (**Extended Data**  
133 **Table 3**). Only a few of the 274 tested Gal4 lines allowed complete rescue; of these, we focused  
134 on the lines with the most restricted expression. When PDF transmission was enabled onto  
135 neurons labeled by R23E05-Gal4<sup>26</sup>, normal responsiveness to daytime light (decrease in

136 locomotor activity) was restored (**Fig. 2d,e; Extended Data Fig. 8b**). R23E05 labels ~20  
137 neurons in the ventral nerve cord, and ~10 neurons in the brain (**Extended Data Fig. 9a,b**). The  
138 brain neurons include the four dorsal-anterior clock neurons (DN1as; **Fig. 2f,g; Extended Data**  
139 **Fig. 9c**). DN1a dendrites and cell bodies are in the dorsomedial protocerebrum, and their axons  
140 descend towards the accessory medulla<sup>27,28</sup> (**Extended Data Fig. 9d**). We restricted expression  
141 of R23E05-Gal4 to mostly DN1as with addition of teashirt-Gal80 (tsh-Gal80), a Gal4 inhibitor  
142 expressed in the ventral nerve cord (**Extended Data Fig. 9e**). We refer to this intersectionally-  
143 derived driver as DN1a-Gal4.

144

145 DN1a silencing had the opposite effect from LNV silencing, perturbing only the *nighttime*  
146 response to light (**Fig. 2h**). The phenotype – a less robust startle - was similar to the nighttime  
147 phenotype of clock-disrupted flies (**Fig. 1g**) suggesting that without DN1as flies can no longer  
148 evaluate light as inappropriate during the night. The only other studies of DN1a function in  
149 adults found that these neurons produce the neuropeptide CCHamide1 (CCHa1)<sup>29</sup> (**Extended**  
150 **Data Fig. 10a**), and promote wakefulness<sup>29,30</sup> in the morning. In our assay, there was no effect  
151 of depleting CCHa1 or its receptor (CCHa1R, **Extended Data Fig. 10b**), showing that the  
152 function we found for DN1as is distinct from what was previously observed<sup>29</sup> – these neurons  
153 signal that light is inappropriate during nighttime, which is complimentary to the daytime role of  
154 LNvs.

155

156 Attenuated responsiveness to nighttime light could reflect general locomotor and visual deficits,  
157 so we tested whether all genotypes were capable of robust visual and motor function. We  
158 reanalyzed data from key experiments (**Fig. 1g; Fig. 2c,h**) to see if the animals whose  
159 responsiveness to light was attenuated ever reached high levels of locomotor activity. There  
160 was no significant difference between experimental animals and controls (**Extended Data Fig.**  
161 **11a**). The lower population-averaged responsiveness in DN1a-silenced, or clock-disrupted flies,  
162 is instead accounted for by infrequency of high activity bouts (**Extended Data Fig. 11b**) which  
163 suggests that these animals were less likely to be in a startled state. To further assess  
164 locomotor vigor, we tested animals with mechanical stimulation and found that all genotypes  
165 reacted with high levels of locomotor activity, easily exceeding levels elicited by light (**Extended**  
166 **Data Fig. 11c**). A visually guided behavior, courtship<sup>31,32</sup>, was also normal (**Extended Data Fig.**  
167 **11d**, Methods). Taken together, these data argue that clock neuron manipulations do not simply  
168 impair sensory input or motor output, but instead disrupt the ability to contextualize light.

169

## 170 **LNv and DN1a clock neurons are mutually interconnected**

171 LNvs and DN1as appear to have opposite and complimentary functions which suggests that  
172 these subpopulations might be somehow coordinated. This theory is supported by the fact that  
173 LNvs use PDF to signal onto DN1as during the daytime (**Fig. 2d**). Based on their opponency,  
174 we tested whether LNv-to-DN1a signaling is inhibitory, by expressing membrane-tethered PDF<sup>33</sup>  
175 in DN1as. Since tethered PDF is anchored to the membrane, it has short-range, cell-  
176 autonomous effects on cells that natively express PDF receptor<sup>34</sup>. Ectopic nighttime PDFR  
177 activation attenuated the nighttime startle to light (**Fig. 2i**), similar to the DN1a silencing  
178 phenotype (**Fig. 2h**). This result confirms that DN1as express PDFR<sup>35,36</sup> and suggests that PDF  
179 normally inhibit DN1as during the daytime. Taken together, results presented thus far suggest  
180 that LNvs and DN1as have opposite roles in contextualizing light during daytime vs nighttime,  
181 and that the peptide PDF is a crucial organizational signal between these subpopulations (**Fig.**  
182 **2j**).

183

184 The interdigitated arrangement of LNv and DN1a projections (**Fig. 3a, Extended Data Fig. 12a**  
185 and **Extended Data Video 2**) is suggestive of reciprocal communication. Genetically encoded  
186 markers of pre- and post-synaptic sites<sup>37,38</sup> showed that LNv axons terminate onto DN1a dendrites  
187 within the superior lateral protocerebrum, while DN1a axons terminate onto LNv dendrites within  
188 the accessory medulla (**Fig. 3b, Extended Data Videos 3,4**). The trans-synaptic tracing tool  
189 *trans-Tango*<sup>39</sup> indeed reported LNvs and DN1as as mutual synaptic targets (**Fig. 3b** and  
190 **Extended Data Fig. 12b,c**). To test whether these putative connections are functional, we  
191 activated each population at times when their activity is predicted to be low, and looked at the  
192 response of the other population *ex vivo*. When LNvs were stimulated via the ATP-gated cation  
193 channel P2X<sub>2</sub><sup>40,41</sup>, the calcium sensor GCaMP6s<sup>42</sup> reported transient inhibition in DN1as (**Fig. 3d**;  
194 **Extended Data Fig. 13a,b**). Conversely, stimulating DN1as led to transient LNv inhibition (**Fig.**  
195 **3e; Extended Data Fig. 13c,d**). The weaker effects of DN1a stimulation could be due to biological  
196 reasons, or because R23E05-LexA is a weaker driver than PDF-LexA (**Extended Data Fig. 14a**).  
197 These results suggest that a reciprocal inhibition motif within the *Drosophila* circadian circuit  
198 contributes to opponent predictions about light (**Fig. 3f**).

199

## 200 **Presynaptic structural plasticity regulates behavioral state transitions**

201 LNv and DN1a neurons are required to contextualize light at different times of day and are  
202 mutually connected. How does the LNv-DN1a circuit alternate between activity states? It was  
203 known that s-LNv axons undergo daily structural remodeling, spreading out in the morning and

204 bundling up at night<sup>43-46</sup>, but the function of this change has remained mysterious<sup>47-51</sup>. We  
205 discovered that DN1a axons are also remodeled daily, on a schedule that is anti-phase to LNvs  
206 (**Fig. 4a**) - their axons are extended at night and retracted during the day. The fluorescently tagged  
207 presynaptic protein Bruchpilot (Brp) showed that changes in presynaptic area correspond with  
208 changes in synapse number (**Fig. 4b, Extended Data Fig. 15a,b**). The rhythmicity of axonal  
209 remodeling is set by the circadian clock, as it was absent in *period* mutants (**Fig. 4c**). These  
210 results raise the possibility that daily changes in connectivity within a mutually inhibitory LNv-  
211 DN1a microcircuit underlie transitions between light-predictive states.

212  
213 The LNv-DN1a circuit appears in distinct physical configurations during the day (more LNv output  
214 sites) vs night (more DN1a output sites). For each population, the time of day when their axons  
215 occupy the most space correlates with the time when that population is necessary. To test the  
216 idea that axonal structural remodeling contributes to the light-predictive internal model, we looked  
217 for manipulations that can affect remodeling in the two populations. We found that DN1as might  
218 utilize similar cellular programs as LNvs<sup>46</sup> - manipulating the GTPase Rho1 levels bidirectionally  
219 affected remodeling in both populations. For both LNvs and DN1as, Rho1 overexpression (OE)  
220 decreased axonal area, while RNAi-mediated Rho1 depletion increased axonal area (**Fig. 4d,e**).

221  
222 In agreement with the idea that remodeling supports transitions between opponent predictive  
223 states, Rho1 overexpression in LNvs caused increased locomotion in response to daytime light,  
224 while overexpression in DN1as attenuated the startling effect of nighttime light (**Fig. 4f**). That is,  
225 preventing presynaptic area from increasing phenotypically resembles silencing (**Fig. 2c,h**).  
226 Rho1 overexpression did not appear to overtly damage the LNv neurons, as animals had  
227 relatively intact locomotor activity rhythms (**Extended Data Fig. 16a** and **Extended Data Table**  
228 **2**) and did not have accelerated evening locomotor activity onset, which occurs when LNvs are  
229 ablated or constitutively silenced<sup>18,52</sup> (**Extended Data Fig. 16a**). The daytime phenotype of  
230 Rho1 overexpression in LNvs, and nighttime phenotype of Rho1 overexpression in DN1as,  
231 together match the light response phenotypes seen when circadian clocks are disabled (**Fig.**  
232 **1g**). These data fit a model in which structural plasticity biases the outcome of LNv-DN1a  
233 reciprocal inhibition, leading to a flexible internal model of what the light conditions should be at  
234 any moment (**Fig. 4g**).

235

236 **Discussion**

237 Alterations of neuronal activity, rather than morphology, are usually considered the cause of  
238 cognitive flexibility<sup>53</sup>. The mechanism that we describe relies on physical cellular restructuring.  
239 What are the advantages of a system like this? While near-instantaneous electrical activity is  
240 the basic language of neurons, many behaviors and internal states occur on much longer  
241 timescales. Morphological remodeling is a slower process, aligning with functions that change  
242 over the course of several hours. In support of this view, changes in neuronal morphology have  
243 been found to underlie appetite<sup>54</sup>, sexual experience<sup>55</sup>, and foraging history<sup>56</sup>. Though  
244 seemingly wasteful, physical remodeling may be particularly useful for encoding relatively stable  
245 states, due to presumably high energetic barrier.

246  
247 Understanding the mechanisms of circuit state transitions may help clarify the etiology of mood  
248 disorders like depression or bipolar disorder, which are characterized by the lack, or excess, of  
249 transitions between extreme states. Disorders like these may reflect a collapse of organizational  
250 principles that normally permit flexible circuit function. An unsolved question is how behavioral  
251 states can be stable across long timescales, but also undergo flexible transitions. Motifs from  
252 the LNV-DN1a circuit illustrate one solution to this apparent contradiction. LNvs and DN1as are  
253 arranged in a mutually inhibitory system, which may help ensure consistency and accuracy over  
254 long timescales. In the absence of external influence, reciprocal inhibition can stabilize a winner-  
255 take-all steady state<sup>57</sup>. Structural plasticity is a potential way to overcome this inflexibility, by  
256 providing a molecular mechanism to overcome electrical inhibition. We show that *Drosophila*  
257 make remarkably accurate estimates of daytime and nighttime, which may be enabled by  
258 flexible transitions between stable circuit configurations.

259  
260 A predictive nervous system enables continual evaluation of reality relative to context. One  
261 result of this is that a fixed stimulus can evoke a multitude of behaviors depending on an  
262 animal's history, needs, and external context. We show how the circadian system creates a  
263 dynamic internal reference of what environmental conditions *should* be. The paradigm that we  
264 developed offers opportunities to understand the interface between internal models and sensory  
265 evidence. Circadian neurons are sensitive to environmental inputs – can they autonomously  
266 compute prediction error? Clock neurons communicate with downstream dopaminergic  
267 populations<sup>58,59</sup>: are those analogous to mammalian midbrain dopaminergic neurons whose  
268 activities reflect prediction error? We propose that flies assign valence to experienced  
269 environmental conditions, a computation that utilizes an internal model generated through circuit  
270 remodeling.



271

## 272 **Acknowledgments**

273 We thank our lab, the Crickmore lab, Charles Weitz, Michael Do, Matt Pecot, Gordon Fishell,  
274 and Michael Rosbash for advice and comments on the manuscript. Tara Kane assisted with  
275 experiments. Stephen Zhang helped with coding and curated a collection of sparse driver lines  
276 from FlyLight. Stephen Thornquist helped with optogenetics. We thank Rachel Wilson and her  
277 lab for saline and for calcium imaging advice; and Corey Harwell for microscope access. For fly  
278 stocks, we thank David Anderson, Andreas Bergmann, Justin Blau, Adam Claridge-Chang,  
279 Michael Crickmore, Barry Dickson, Paul Hardin, Robert Kittel, Michael Nitabach, Matt Pecot,  
280 Jeff Price, Orie Shafer, Amita Sehgal, Paul Taghert and Rachel Wilson. We are especially  
281 grateful to Dr. Gerry Rubin and the Howard Hughes Medical Institute's Janelia Research  
282 Campus for access to JRC\_SS00681-Gal4 and JRC\_SS00645-Gal4 lines prior to publication.  
283 These strains will be described further in Dionne, Rubin, and Nern (manuscript in preparation).  
284 For antibodies, we thank Paul Hardin and Amita Sehgal. **Funding:** This work was supported by  
285 the National Science Foundation Graduate Research Fellowship Program under Grant No. (BS,  
286 NSF Grant No. DGE1144152). Any opinions, findings, and conclusions or recommendations  
287 expressed in this material are those of the author(s) and do not necessarily reflect the views of  
288 the National Science Foundation. BS was also supported by the National Institutes of Health  
289 (F31 EY027252). DR is a New York Stem Cell – Robertson investigator. This work was  
290 supported by a New York Stem Cell Foundation grant, and a Klingenstein-Simons Fellowship  
291 Award in the Neurosciences.

292

## 293 **Author contributions**

294 B.S. and D.R. designed the study. B.S., S.S. and D.R. performed experiments. B.S. and D.R.  
295 analyzed the data and wrote the paper.

296

## 297 **Declaration of interests**

298 The authors declare no conflict of interest.

## 299 Figures

Figure 1

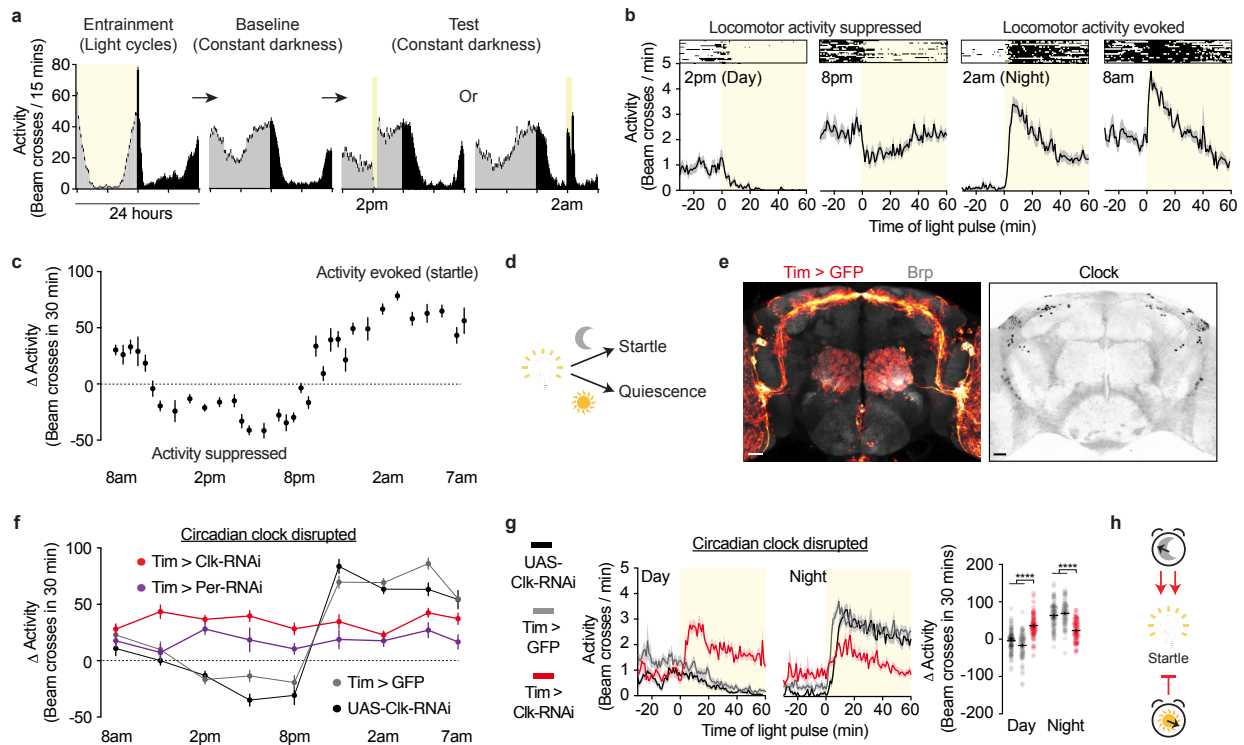

300

301 **Figure 1. Circadian clocks bidirectionally modulate light responsiveness.** (a) Experimental  
302 protocol and daily locomotor activity of an isogenic wild-type strain,  $w^+iso31$ , during entrainment,  
303 baseline, and test periods. Vertical bars: 15-minute bins of locomotor activity, where height  
304 indicates mean. Error bars, S.E.M. Yellow indicates light; reactivity to light depends on time-of  
305 day, even though animals are in complete darkness. (b) A closer view of acute locomotor  
306 responses to light at different times. Boxed insets show representative activities of individual  
307 flies; below, averaged activity of all tested wild-type flies. These data are collected at 1-minute  
308 intervals. Shading: error bars (S.E.M in all figures). (c) Change in activity evoked by light, in  
309 independent wild-type cohorts, across a 24 hour period. (d) Schematic of daily light responses  
310 in wild-type flies. (e) Left, Tim-Gal4 is expressed throughout the circadian network, labeled with  
311 GFP. The whole brain is visualized with an antibody against Bruchpilot (Brp), a presynaptic  
312 protein. Tim-Gal4 is also expressed in noncircadian neurons in the antennal lobe and glia<sup>60</sup>,  
313 which was partially blocked by inclusion of repo-Gal80 (data not shown) in all experiments using  
314 this driver. Right, clock neurons labeled with an antibody against Clock. (f) Light-evoked  
315 changes in activity across 24 hours in controls (black and gray), and in flies in which circadian  
316 proteins Clock (Clk, red) or Period (Per, purple) were depleted with RNAi. Independent cohorts  
317 were tested at different time points. (g) Clock disruption (red) perturbs acute light  
318 responsiveness during daytime and nighttime. (h) Proposed model for daily switches in light  
319 contextualization, regulated by the clock. For all figures, behaviors were analyzed with Two-way  
320 ANOVA, Tukey's post-test, unless otherwise indicated. \* $p < 0.05$ , \*\* $p < 0.01$ , \*\*\* $p < 0.001$ ,  
321 \*\*\*\* $p < 0.0001$  for all figures. Extended Data Table 1 shows sample sizes for all figures. For all  
322 figures, scale bars: 20  $\mu$ m.

Figure 2

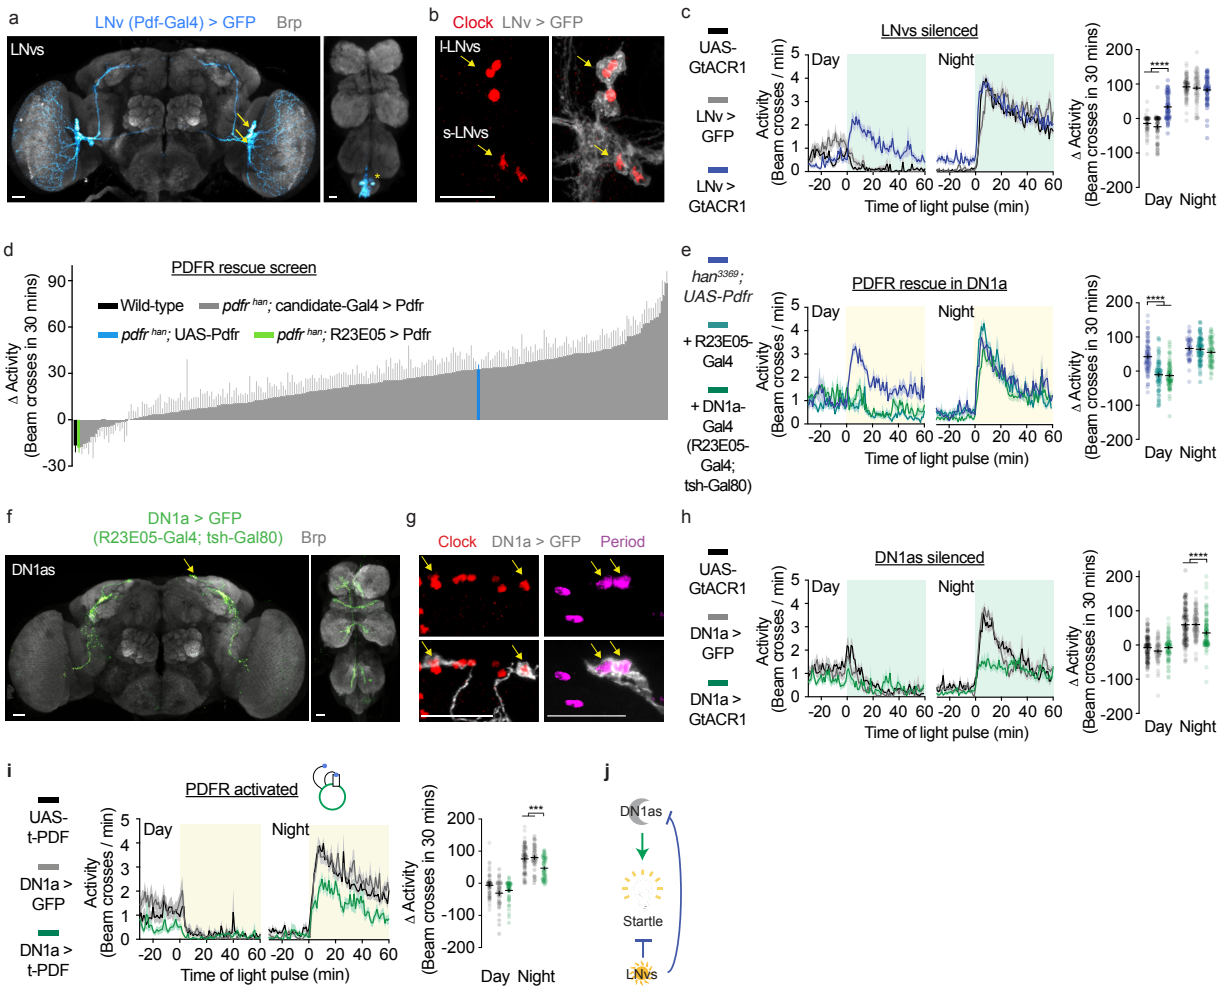

323

324 **Figure 2. Different clock neurons are required for normal daytime, vs nighttime, reactivity**  
 325 **to light. (a)** Left, LNV neurons in the brain labeled with GFP. Arrows point to LNV cell bodies.  
 326 Right, non-LNV expression in the ventral nerve cord (VNC) indicated by asterisk. LNV-Gal4 is  
 327 driven by *pdf* regulatory elements<sup>18,61</sup>. **(b)** Clock staining in the LNVs. **(c)** Silencing LNVs using the  
 328 light-gated chloride channel GtACR1 perturbs mid-day but not mid-night light responsiveness. For  
 329 all optogenetic experiments, the light used for neuronal silencing simultaneously served to probe  
 330 behavior. **(d)** A *pdf* genetic rescue screen reveals a role for LNV-to-DN1a transmission in  
 331 contextualizing daytime light. PDFR was expressed in candidate neuronal populations in *han*<sup>3369</sup>  
 332 or *han*<sup>5304</sup> *pdf* mutant backgrounds. **(e)** Activity traces for flies in which PDFR was expressed  
 333 using R23E05-Gal4 (dark green) or using R23E05-Gal4 with *teashirt*-Gal80 (DN1a-Gal4, light  
 334 green) in the *han*<sup>3369</sup> *pdf* mutant background. This experiment was also done in the *han*<sup>5304</sup> *pdf*  
 335 mutant background (Figure S4A). **(f)** DN1as visualized by GFP (DN1a > GFP). **(g)** Clock and  
 336 Period staining in DN1as. **(h)** DN1a silencing perturbs mid-night but not mid-day light  
 337 responsiveness. **(i)** Constitutive activation of PDFR with t-PDF in DN1as attenuates nighttime  
 338 response to light. **(j)** Model of LNV and DN1a roles in contextualizing light.

Figure 3

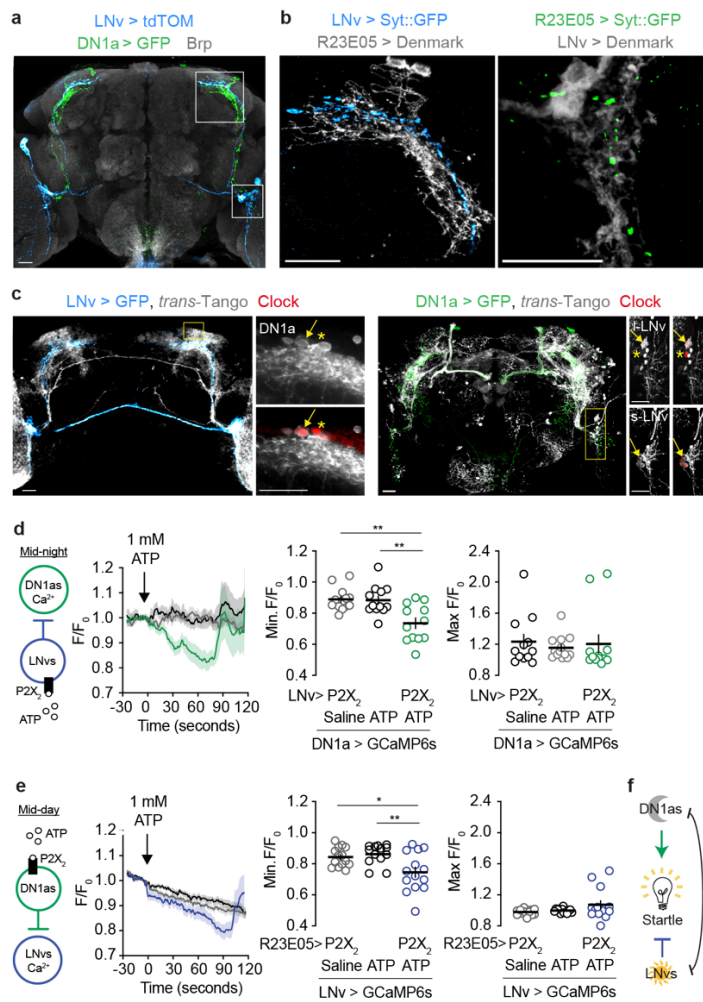

339

340 **Figure 3. Reciprocal targeting between LNvs and DN1as.** (a) Expression of GFP in DN1as,  
 341 and tdTomato in LNvs, reveals overlapping projections. (b) LNv axons overlap with DN1a  
 342 dendrites (left), and *vice versa* (right). Synaptotagmin (Syt): presynaptic marker; Denmark:  
 343 postsynaptic marker. Left, area outlined on the top in (a). Right, area outlined on the bottom in  
 344 (A). (c) Postsynaptic targets labeled by *trans-Tango* indicate that LNvs and DN1as target each  
 345 other. Arrows point to target cells expressing Clock. Asterisks: DN1as and LNvs not labeled by  
 346 *trans-Tango*. (d) Chemogenetic activation of LNvs during the nighttime silences DN1as *ex vivo*.  
 347 (e) Chemogenetic activation of DN1as during the daytime silences LNvs *ex vivo*. In all conditions,  
 348 a steady decline in GCaMP6s fluorescence was seen in LNvs, likely due to photobleaching. For  
 349 (d) and (e), measurements were taken from flies that were in light-dark cycles (at ~2pm (ZT6) for  
 350 daytime, at ~2am (ZT18) for nighttime). Minimal and maximal changes in calcium are reported for  
 351 each trial. One-way ANOVA with Tukey's post-hoc test. (f) Model of LNv and DN1a inhibitory  
 352 circuit connectivities.

Figure 4

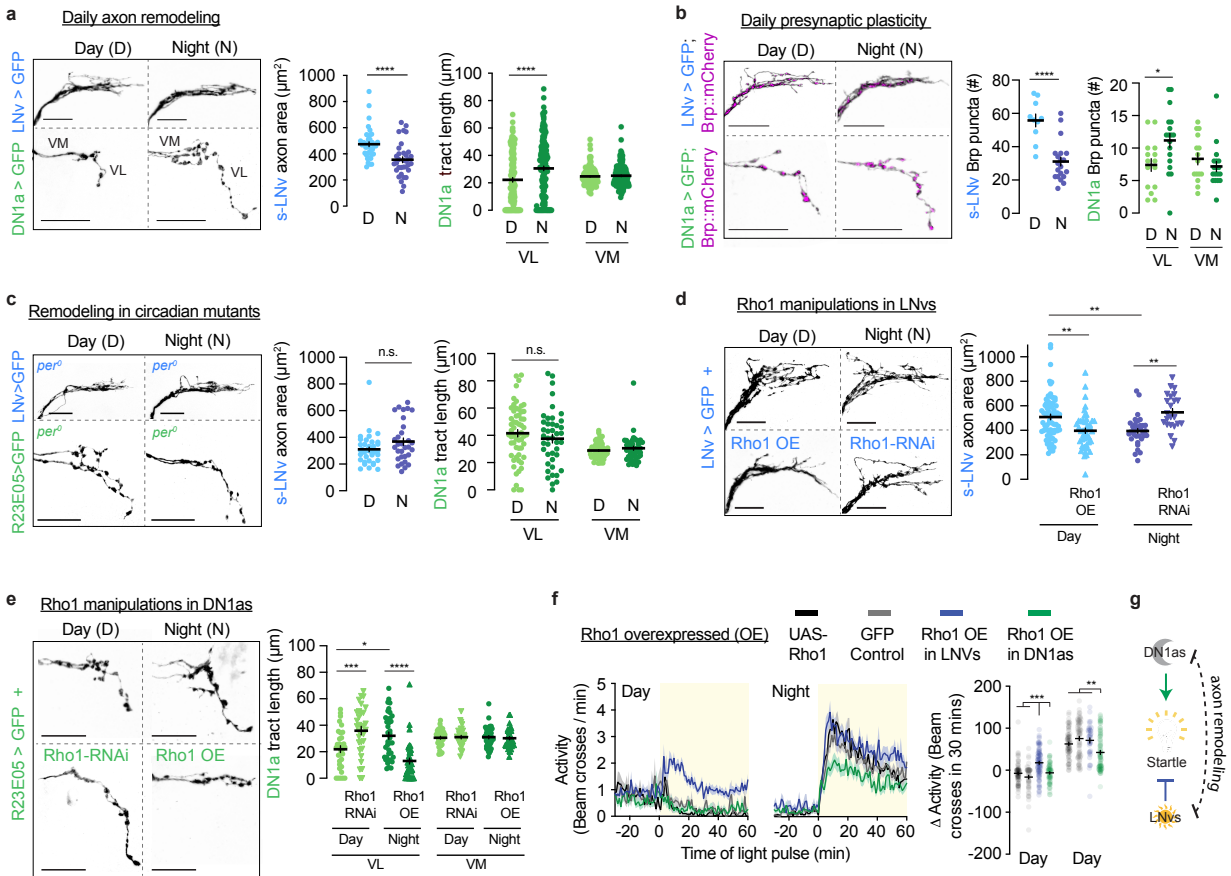

353

354 **Figure 4. Axon remodeling in LNvs and DN1as is required for normal light reactivity (a)**  
 355 LNvs and DN1as show antiphase oscillations in neurite morphology. Measurements were taken  
 356 from flies that were in light-dark cycles (at 2pm (ZT6) for daytime, at 2am (ZT18) for nighttime).  
 357 Quantifications show data for individual brain hemispheres. For this figure, t-Test in LNvs, Two-  
 358 way ANOVA with Tukey's post-hoc test in DN1as. Ventromedial (VM) tracts are internal controls  
 359 for ventrolateral (VL) tracts in DN1as. **(b)** Daily changes in presynaptic site number in LNvs and  
 360 DN1as, as reported by a synaptic marker Brp:mCherry (magenta) within GFP-labeled neurites  
 361 (black). **(c)** *Period* mutants lack LNv and DN1a plasticity rhythms. **(d)** Manipulating Rho1 in LNvs  
 362 (Rho1-RNAi vs Rho1 overexpression (OE)) bi-directionally changes axonal fasciculation. One-  
 363 way ANOVA with Tukey's post-hoc test. **(e)** Manipulating Rho1 in DN1as bi-directionally changes  
 364 axonal fasciculation. One-way ANOVA with Tukey's post-hoc test. **(f)** Flies with fasciculated  
 365 (closed) dorsal LNv axons (Rho1 OE in LNvs, blue) have perturbed daytime, but not nighttime,  
 366 light responsiveness. The opposite is true in flies in which DN1a axons are kept short (Rho1 OE  
 367 in DN1as, green). 'GFP control' is LNv > GFP during the daytime, and DN1a > GFP during the  
 368 nighttime. **(g)** Schematic summary of LNv-DN1a circuit state transitions that regulate opponent  
 369 predictions about light.

370

371

## 372 **EXPERIMENTAL PROCEDURES**

373

### 374 ***Drosophila melanogaster* stocks**

375 All *Drosophila* stocks used in this study are listed in the key resource table. Flies were grown on  
376 cornmeal-agar medium at 25°C under 12 hour light : 12 hour dark conditions in a room with ~70  
377 lux white light. UAS-myr::GFP, UAS-mCD8::GFP, UAS-tethered PDF, and UAS-Dicer2 lines  
378 were outcrossed six or seven times into the control *iso31* background. No differences in light  
379 responses were observed between outcrossed and non-outcrossed lines. One experiment (**Fig.**  
380 **1f,g** (2pm and 2am only) had UAS-mCD8::GFP controls in the GFP condition, whereas the  
381 genotype is UAS-myr::GFP elsewhere in the paper. No behavioral differences were seen  
382 between UAS-mCD8::GFP and UAS-myr::GFP. RNAis were co-expressed with Dicer2 (Dcr) to  
383 increase efficiency<sup>62</sup>. “LNv-Gal4” used in this study has two copies of Pdf-Gal4, on the second  
384 and third chromosomes. Similar results for silencing and neuropeptide knockdown were found  
385 using a single copy of Pdf-Gal4 on the second chromosome, although effect sizes were smaller  
386 (data not shown). Wild-type *w<sup>+</sup>iso31* wild-type strains were created by backcrossing *Canton S*  
387 six times into the *iso31* background. Detailed genotypes and samples sizes for each experiment  
388 are provided in **Extended Data Table 1**. Origin of each fly stock is shown in **Extended Data**  
389 **Table 4**. Stocks are available upon request.

390

### 391 **Generation of R23E05-LexA and R23E05-Gal80**

392 Standard Gateway cloning protocols (Thermo Fisher Scientific, 11791020 and 11789020) were  
393 followed to derive constructs in which either LexA or Gal80 are driven by the R23E05 enhancer.  
394 gtcccgatttcgtcgaaggattcaa forward and gctaaccggatgacgggtaccaggag reverse primers were used  
395 to PCR-amplify a 644kb enhancer fragment from R23E05-Gal4 flies. This product was  
396 subcloned into pBPLexa:P65UW (Addgene plasmid # 26231,<sup>63</sup> or pBPGal80uw-6 (Addgene  
397 plasmid # 26236,<sup>63</sup>), which were gifts from Gerry Rubin. Resulting constructs were inserted into  
398 the attP2 landing site by embryo injection (Rainbow Transgenics).

399

### 400 **Locomotor activity measurements**

401 Male flies, 1-9 days old, were collected and individually housed in 65 mm glass tubes with  
402 approximately 20 mm of cornmeal-agar media. To avoid cumulative effects of repeated  
403 exposure to light, separate cohorts were tested for each trial. They were given at least 48 hours  
404 to acclimate before experiments began. Female flies were collected as virgins (<1 day old) upon  
405 eclosion, and group housed for at least 3 days before testing. Activity and sleep were measured

406 using the Trikinetics *Drosophila* activity Monitor system, which counts infrared beam crosses  
407 through the midline of the glass tube. Experiments were conducted in DigiTherm CircKinetics  
408 incubators (Tritech Research, DT2-CIRC-TK) at 25°C. Aside from optogenetic experiments, light  
409 pulses were delivered using white incubator lights (~260 lux white fluorescent bulbs, ~102  
410  $\mu\text{W}/\text{mm}^2$  in the 470 nm range). Most experiments in **Fig. 2d** and all experiments in **Extended**  
411 **Data Fig. 11c** and **Extended Data Video 1** were conducted in larger incubators (Percival, DR-  
412 41VL) to accommodate video cameras, the mechanical stimulation apparatus, or the large  
413 number of locomotor activity monitors required to screen for LNV-Downstream neurons (Fig  
414 2d).

415

### 416 **Optogenetics**

417 For 48-96 hours before the experiment, control and experimental flies were fed 50 mM all-trans-retinal  
418 (Sigma Aldrich R2500) that was diluted in ethanol (Koptec, V1001) and coated onto rehydrated potato  
419 food (Carolina Bio Supply Formula 4-24 Instant *Drosophila* Medium, Blue). For GtACR1 experiments,  
420 six 530 nm green LEDs (Luxeon Rebel, LXML-PM01-0100) were driven by a 700 mA constant current  
421 driver (LuxDrive BuckPuck, 03021-D-E-700), and pulse-width modulated signal to an averaged intensity  
422 of ~202  $\mu\text{W}/\text{mm}^2$ . LEDs were placed along the wall of the incubator and controlled with an Arduino Uno  
423 Rev3 (Arduino, A000066) microcontroller using a custom script. Between replicates, genotypes were  
424 positionally counterbalanced within the incubator to control for nonuniform illumination from the light  
425 source (LEDs or white fluorescent bulb). Silencing motor neurons with VGlut-Gal4 allowed us to confirm  
426 that all flies received enough illumination to access neurons expressing GtACR1<sup>19,64</sup>, regardless of  
427 position within the incubator. Light intensity measurements were recorded using a power meter  
428 (Thorlabs, PM100D). Lux measurements were recorded using a light meter (Extech, LT300). The  
429 spectra of ambient white light in the laboratory and in experimental incubators were measured with a  
430 spectrometer (Thorlabs, CCS200). All reported measurements were taken with devices facing the light  
431 source. Power measurements for white light were taken at the 470 nm range.

432

### 433 **Mechanical stimulation**

434 Flies were shaken using a multi-tube vortexer (Trikinetics TVOR-120) modified to house *Drosophila*  
435 Activity Monitors (Trikinetics). The vortexer was programmed to deliver medium intensity vibrations  
436 continuously for an hour.

437

### 438 **Courtship assay**

439 Courtship assays were conducted as previously described<sup>65</sup>. Briefly, male flies were isolated at least  
440 five days before the assay, to allow recovery of mating drive<sup>65,66</sup>. On the day of the assay, one male  
441 was aspirated into a cylindrical chamber (10 mm diameter and 3 mm height) with one virgin *w<sup>+</sup>iso31*  
442 female. Flies were videotaped from above using a handheld camera (Canon, Vixia HRF800) and videos  
443 were manually scored for courtship behaviors. Courtship indices were calculated from the percentage  
444 of time spent in mating behaviors during a five minute window following courtship initiation (as indicated  
445 by unilateral wing extension). If flies did not engage in courtship throughout the entire 15 minute assay,  
446 they were given a courtship index value of 0. Flies were illuminated from below (~3.7  $\mu\text{W}/\text{mm}^2$  in the  
447 475 nm range) using a light pad (Artograph, LightPad 930), in addition to aforementioned overhead  
448 white room lighting. Because optogenetic LEDs interfered with the ability to visualize and record flies,  
449 we relied on the white light from the light pad as an optogenetic effector. While the lightpad was  
450 substantially dimmer than the LEDs used in our optogenetic silencing experiments, our control  
451 experiments with other drivers showed that this light could in principle penetrate the cuticle to effect  
452 GtACR1 in the nervous system. For positive controls, we verified the lightpad's efficacy in inducing  
453 paralysis or extending mating duration in flies where GtACR1 was expressed by VGLUT-Gal4 or  
454 Corazonin-Gal4 respectively (data not shown, <sup>19,67</sup>).

455

#### 456 **Immunohistochemistry**

457 Flies were anesthetized under CO<sub>2</sub>. Brains were then dissected in cold Schneider's medium (Gibco,  
458 21720-001) and immediately fixed in 4% paraformaldehyde (PFA, Electron Microscopy Sciences,  
459 15710). After a 20 minute fixation at room temperature, brains were washed three times with PBS  
460 containing 0.3% Triton X-100 (Amresco, M143-1L), 20 minutes per wash, and blocked overnight with  
461 10% donkey serum (Jackson ImmunoResearch, 017-000-121) at 4°C. Primary and secondary  
462 antibodies were diluted in donkey serum and incubated with brains for 48 hours each. For Brp (nc82)  
463 stainings, the primary antibody incubation was conducted for 72 hours due to the large number of Brp  
464 epitopes in the brain. Three 20 minute washes were done after primary and secondary antibody  
465 incubations.

466

467 Primary antibodies used: Guinea pig anti-Clock antibody (Gift from Paul Hardin, 1:2000 dilution),  
468 Chicken anti-GFP antibody (Aves, GFP-1020, 1:1000 dilution), Mouse anti-Brp antibody  
469 (Developmental Studies Hybridoma Bank (DSHB), NC82, 1:7 dilution), Mouse anti-PDF antibody  
470 (DSHB, PDF C7, 1:100 dilution), Rabbit anti-DsRed antibody (Clontech, 632496, 1:100 dilution),  
471 Guinea pig anti-Period antibody (Gift from Amita Sehgal, 1:50 dilution), Rabbit anti-CCHa1 (Our lab  
472 raised antibodies against the peptide QIDADNENYSGYELT <sup>68</sup>, Genscript, 1:50 dilution). Secondary



473 antibodies used: Donkey anti-Mouse 488 (Thermo Fisher Scientific, A-21202, 1:1000 dilution), Donkey  
474 anti-Rabbit 568 (Thermo Fisher Scientific, A-10042, 1:1000 dilution), Donkey anti-Mouse 647 (Thermo  
475 Fisher Scientific, A-31571, 1:1000 dilution), Donkey anti-Guinea Pig 488 (Jackson ImmunoResearch,  
476 703-545-148, 1:100 dilution), Donkey anti-Chicken 488 (Jackson ImmunoResearch, 703-545-155,  
477 1:100 dilution), Donkey anti-Guinea pig Cy3 (Jackson ImmunoResearch, 706-165-148, 1:100 dilution),  
478 Donkey anti-Guinea pig 647 (Jackson ImmunoResearch, 706-605-148, 1:100 dilution).

479  
480 Tissues were whole-mounted in Prolong Gold Antifade reagent (Invitrogen, 1942345) on glass slides  
481 with coverslips (Electron Microscopy Sciences, 64321-10, 72230-01). Confocal images were obtained  
482 using a Leica SP8 confocal microscope at 10x, 2.4  $\mu\text{m}$  intervals, for morphology quantifications; 20x, 1  
483  $\mu\text{m}$  intervals for expression patterns, and 63x, 0.3  $\mu\text{m}$  intervals for imaging of pre- and postsynaptic  
484 sites. Maximum projection images and quantifications were obtained using FIJI. Levels of brightness  
485 and contrast were adjusted across the whole image using FIJI or Adobe Photoshop.

486  
487 For quantifications comparing neurite morphologies between mid-day and mid-night, whole heads were  
488 fixed because prolonged exposure to light (required for dissections) can modify the operation of the  
489 clock. Heads were fixed for 50 minutes at room temperature with fixative containing 4% PFA and 0.3%  
490 Triton X-100. For mid-night samples, heads were fixed with minimal light exposure, using red light that  
491 is less disruptive to the light-sensitive clock protein Cryptochrome<sup>69-72</sup>. Acquisitions were conducted at  
492 10x due to the large number of samples; as the drivers we used are expressed sparsely, this resolution  
493 was sufficient. Because the z-axis of the slide/coverslip chamber is slightly shorter than the height of  
494 the brain, all of the brains were pressed slightly, and in similar orientation.

495  
496 For *trans*-Tango experiments, flies were raised for 5 weeks at 18°C, which permits stronger expression  
497 than 25°C<sup>39</sup>. We often noticed aberrant morphology in cells expressing the *trans*-Tango construct, likely  
498 due to overexpression of neurexin and the cell adhesion molecule ICAM1 at presynaptic sites<sup>39</sup>.

499  
500 **Calcium imaging**  
501 Experiments were conducted in a 6-hour window centered around periods of putative peak activity  
502 (mid-day for DN1a->LNv and mid-night for LNv->DN1a), alternating between control and experimental  
503 samples. *Ex vivo* whole mount brains were explanted in Nunclon cell culture dishes (Thermo Scientific,  
504 150318) which contained 3 mL of chilled *Drosophila* saline (Gift from Rachel Wilson, 103 mM NaCl, 3  
505 mM KCl, 5 mM N-tris (hydroxymethyl) methyl-2-aminoethane-sulfonic acid, 8 mM trehalose, 10 mM  
506 glucose, 26 mM NaHCO<sub>3</sub>, 1 mM NaH<sub>2</sub>PO<sub>4</sub>, 1.5 mM CaCl<sub>2</sub>, and 4 mM MgCl<sub>2</sub> (osmolarity adjusted to

507 270–275 mOsm). Saline was bubbled with 95/5% carboxygen prior to the experiment. Brains were  
508 dissected in the same media used to conduct the experiment. Brains in which GCaMP was expressed  
509 in LNvs were allowed to rest for 2.5 minutes prior to the experiments under the blue imaging light.  
510 Brains in which GCaMP was expressed in DN1as were allowed to rest for 5 minutes prior to the  
511 experiments under the blue imaging light. During this baseline period, we noticed increased large  
512 calcium transients (**Extended Data Fig. 13a,c**), likely due to control of clock neuron activity by the light-  
513 sensitive protein Cryptochrome<sup>73,74</sup>. During pilot experiments we chose baseline intervals that were  
514 usually sufficient to allow activity to stabilize. Two trials were excluded (one experimental and one  
515 control) because baseline activities were not stable. These trials are shown as red traces in **Extended**  
516 **Data Fig. 13a,b**. For P2X<sub>2</sub> experiments, 20 µL of 150 mM ATP (Sigma, A2383), diluted in *Drosophila*  
517 saline, was pipetted gently down the side of the dish, to a final concentration of 1 mM. Positive control  
518 experiments in which both P2X<sub>2</sub> and GCaMP were expressed in LNvs showed that ATP delivered this  
519 way could start inducing small changes within a few frames of delivery. Acquisition occurred at 1  
520 frame/second.

521

### 522 **Quantifying locomotor activity**

523 Sleep and activity data were analyzed using custom Matlab software (available on github at  
524 <https://github.com/CrickmoreRoguljaLabs>) and plotted in Graphpad Prism 8 for Macintosh.  
525 Activity counts were collected at 1 minute intervals. A sleep episode was defined as inactivity  
526 lasting at least five minutes<sup>75,76</sup>.

527

528 Circadian analysis was conducted using the Cycle-P function in FaasX, using 30-minute bins<sup>77</sup>.  
529 Our experiments occurred during the second day of darkness, but rhythmicity, tau and power of  
530 locomotor rhythms (**Extended Data Table 2**) were calculated during 4 days in darkness.  
531 Additional days of analysis allowed us to acquire more accurate measurements<sup>77,78</sup>. This  
532 analysis is conservative, because circadian deficits grow stronger with more time spent in  
533 darkness<sup>18</sup>.

534

### 535 **Quantifying morphological imaging data**

536 Measurements were conducted blind using the segmented line tool in FIJI on the maximum  
537 intensity projection of whole brain z-stacks. No obvious daytime-nighttime differences were  
538 observed in the z-axis for the DN1a ventrolateral tract. For Brp quantifications, acquisitions were  
539 done at 63x. The sparsity of synaptic sites along the ventrolateral DN1a tract allows for  
540 visualization and counting of individual punctum. Brp counts were conducted blind. Each

541 hemisphere was computed as an independent sample because of variability between  
542 hemispheres.

543

#### 544 **Quantifying immunostaining intensity**

545 For quantifications of fluorescence intensities used to validate the efficiency of RNAi, the experimenter  
546 was not blinded during quantification, which we deemed acceptable due to the large and consistent  
547 effect sizes. Regions of interest were selected using the freehand selection tool in FIJI, on summed  
548 intensity projections of whole brain z-stacks. For measurements of Clock- and Period- RNAi efficacy,  
549 intensity measurements were taken within the most visible s-LNv cell body per brain because all 5 s-  
550 LNvs could not all be easily identified in the knockdown conditions. For measurements of GFP intensity,  
551 when comparing the strength of LexA drivers, there was substantial variability between hemispheres.  
552 Thus measurements were taken for both hemispheres and subsequently averaged.

553

#### 554 **Quantifying *ex vivo* calcium imaging**

555 Data were analyzed with ImageJ, using the freehand selection tool to choose a ~100µm ROIs from s-  
556 LNv dorsal terminals. Only the brighter hemisphere was used for analysis. LNv axons and DN1a  
557 dendrites were chosen for quantification because these regions were consistently identifiable, whereas  
558 DN1a axons and LNv dendrites were not usually visible with GCaMP6s. For figures, 2-3 frames (two  
559 seconds) of data was removed from each sample because of motion artifacts from pipetting. Unaltered  
560 trials are in reported in **Extended Data Fig. 13a,c**. Baseline fluorescence was calculated from the  
561 average of ten frames prior to ATP delivery, excluding the first frame before ATP. Minimum and  
562 maximum fluorescence was calculated using standard Excel functions from all frames after ATP  
563 delivery except for the first five frames, to exclude potential residual motion artifacts. 1-3 samples per  
564 condition showed drift after pipetting, thus we used an ImageJ registration plugin (TurboReg) to create  
565 a new series corrected against a time-series averaged reference. Two nonrepresentative trials (one  
566 experimental trial and one control) were excluded from averaged results shown in **Fig. 3e**. These  
567 excluded trials are shown in **Extended Data Fig. 13b** and were excluded due to unusually large and  
568 early depolarizations that were putatively due to the effects of blue light stimulation.

569

#### 570 **Statistical analysis**

571 All statistical tests were conducted with Prism 8 for Macintosh (GraphPad). All data are  
572 presented as mean ± S.E.M. For significance indicators (asterisks) referring to multiple post hoc  
573 tests, we conservatively report the largest (least significant) p-value from each of the tests.  
574 Exact p values are in Extended Data Table 1. Only significant comparisons are indicated. For

575 light probe experiments, group means were compared using a Two-way ANOVA with Tukey's  
576 post-hoc comparisons against all possible conditions. For all behavioral panels using two-way  
577 ANOVA, multiple comparisons between time points are not reported, except for **Extended Data**  
578 **Fig. 1a**. Significant differences between control genotypes are not indicated in figures. We  
579 report them here: in **Fig 2i** the two parental controls significantly differed during the day ( $p =$   
580  $0.0111$ ), the two parental controls in **Extended Data Fig. 6b**. significantly differed from each  
581 other at night ( $p < 0.0001$ ), and in **Extended Data Fig. 10c**, DN1a>GFP was significantly  
582 different from both other conditions during the day,  $p = 0.0384$  vs. DN1a > CCha1 RNAi and  $p =$   
583  $0.0005$  vs UAS parental control). Behavioral experiments in main figures each had at least three  
584 replicates of approximately sixteen flies each. In cases where genotypes were only tested at  
585 one time point, we used a One-way ANOVA followed by Tukey's post-hoc test. For imaging  
586 experiments where we quantified LNV or DN1a morphology, we treated each hemisphere as a  
587 single sample because we noticed substantial variability between hemispheres. In **Figure 4**,  
588 comparisons between VL and VM DN1a tracts are not reported. Comparisons between Rho1  
589 overexpression and Rho1-RNAi are also not reported. Power analyses to predetermine sample  
590 size were not conducted. Experimenters were not blind to conditions except during  
591 quantifications of morphology. Sample sizes are shown in **Extended Data Table 1**.

592

## 593 **DATA AND SOFTWARE AVAILABILITY**

594 All data and materials are available upon request.

595

- 596 1 Watabe-Uchida, M., Eshel, N. & Uchida, N. Neural Circuitry of Reward Prediction Error. *Annu Rev Neurosci* **40**, 373-394, doi:10.1146/annurev-neuro-072116-031109 (2017).
- 597 2 Mirenowicz, J. & Schultz, W. Importance of unpredictability for reward responses in  
598 primate dopamine neurons. *J Neurophysiol* **72**, 1024-1027,  
599 doi:10.1152/jn.1994.72.2.1024 (1994).
- 600 3 Schultz, W., Dayan, P. & Montague, P. R. A neural substrate of prediction and reward.  
601 *Science* **275**, 1593-1599, doi:10.1126/science.275.5306.1593 (1997).
- 602 4 Vitaterna, M. H., Takahashi, J. S. & Turek, F. W. Overview of circadian rhythms. *Alcohol*  
603 *Res Health* **25**, 85-93 (2001).
- 604 5 Golombek, D. A. & Rosenstein, R. E. Physiology of circadian entrainment. *Physiol Rev* **90**,  
605 1063-1102, doi:10.1152/physrev.00009.2009 (2010).
- 606 6 Rensing, L. & Ruoff, P. Temperature effect on entrainment, phase shifting, and  
607 amplitude of circadian clocks and its molecular bases. *Chronobiol Int* **19**, 807-864,  
608 doi:10.1081/cbi-120014569 (2002).
- 609 7 Top, D. & Young, M. W. Coordination between Differentially Regulated Circadian Clocks  
610 Generates Rhythmic Behavior. *Cold Spring Harb Perspect Biol* **10**,  
611 doi:10.1101/cshperspect.a033589 (2018).
- 612

- 613 8 Eckel-Mahan, K. & Sassone-Corsi, P. Metabolism and the circadian clock converge.  
614 *Physiol Rev* **93**, 107-135, doi:10.1152/physrev.00016.2012 (2013).
- 615 9 Lu, B., Liu, W., Guo, F. & Guo, A. Circadian modulation of light-induced locomotion  
616 responses in *Drosophila melanogaster*. *Genes Brain Behav* **7**, 730-739,  
617 doi:10.1111/j.1601-183X.2008.00411.x (2008).
- 618 10 Ryder, E. *et al.* The DrosDel collection: a set of P-element insertions for generating  
619 custom chromosomal aberrations in *Drosophila melanogaster*. *Genetics* **167**, 797-813,  
620 doi:10.1534/genetics.104.026658 (2004).
- 621 11 Huber, R. *et al.* Sleep homeostasis in *Drosophila melanogaster*. *Sleep* **27**, 628-639,  
622 doi:10.1093/sleep/27.4.628 (2004).
- 623 12 Dubowy, C. & Sehgal, A. Circadian Rhythms and Sleep in *Drosophila melanogaster*.  
624 *Genetics* **205**, 1373-1397, doi:10.1534/genetics.115.185157 (2017).
- 625 13 Konopka, R. J. & Benzer, S. Clock mutants of *Drosophila melanogaster*. *Proc Natl Acad*  
626 *Sci U S A* **68**, 2112-2116, doi:10.1073/pnas.68.9.2112 (1971).
- 627 14 Bargiello, T. A., Jackson, F. R. & Young, M. W. Restoration of circadian behavioural  
628 rhythms by gene transfer in *Drosophila*. *Nature* **312**, 752-754, doi:10.1038/312752a0  
629 (1984).
- 630 15 Zehring, W. A. *et al.* P-element transformation with period locus DNA restores  
631 rhythmicity to mutant, arrhythmic *Drosophila melanogaster*. *Cell* **39**, 369-376,  
632 doi:10.1016/0092-8674(84)90015-1 (1984).
- 633 16 Tataroglu, O. & Emery, P. Studying circadian rhythms in *Drosophila melanogaster*.  
634 *Methods* **68**, 140-150, doi:10.1016/j.ymeth.2014.01.001 (2014).
- 635 17 Blau, J. & Young, M. W. Cycling vrille expression is required for a functional *Drosophila*  
636 clock. *Cell* **99**, 661-671, doi:10.1016/s0092-8674(00)81554-8 (1999).
- 637 18 Renn, S. C., Park, J. H., Rosbash, M., Hall, J. C. & Taghert, P. H. A pdf neuropeptide gene  
638 mutation and ablation of PDF neurons each cause severe abnormalities of behavioral  
639 circadian rhythms in *Drosophila*. *Cell* **99**, 791-802 (1999).
- 640 19 Mohammad, F. *et al.* Optogenetic inhibition of behavior with anion channelrhodopsins.  
641 *Nat Methods* **14**, 271-274, doi:10.1038/nmeth.4148 (2017).
- 642 20 Helfrich-Forster, C. The period clock gene is expressed in central nervous system  
643 neurons which also produce a neuropeptide that reveals the projections of circadian  
644 pacemaker cells within the brain of *Drosophila melanogaster*. *Proc Natl Acad Sci U S A*  
645 **92**, 612-616, doi:10.1073/pnas.92.2.612 (1995).
- 646 21 Hyun, S. *et al.* *Drosophila* GPCR Han is a receptor for the circadian clock neuropeptide  
647 PDF. *Neuron* **48**, 267-278, doi:10.1016/j.neuron.2005.08.025 (2005).
- 648 22 Schlichting, M., Diaz, M. M., Xin, J. & Rosbash, M. Neuron-specific knockouts indicate  
649 the importance of network communication to *Drosophila* rhythmicity. *Elife* **8**,  
650 doi:10.7554/eLife.48301 (2019).
- 651 23 Lear, B. C., Zhang, L. & Allada, R. The neuropeptide PDF acts directly on evening  
652 pacemaker neurons to regulate multiple features of circadian behavior. *PLoS Biol* **7**,  
653 e1000154, doi:10.1371/journal.pbio.1000154 (2009).
- 654 24 Zhang, L. *et al.* DN1(p) circadian neurons coordinate acute light and PDF inputs to  
655 produce robust daily behavior in *Drosophila*. *Curr Biol* **20**, 591-599,  
656 doi:10.1016/j.cub.2010.02.056 (2010).

- 657 25 Pirez, N., Christmann, B. L. & Griffith, L. C. Daily rhythms in locomotor circuits in  
658 *Drosophila* involve PDF. *J Neurophysiol* **110**, 700-708, doi:10.1152/jn.00126.2013 (2013).
- 659 26 Jenett, A. *et al.* A GAL4-driver line resource for *Drosophila* neurobiology. *Cell Rep* **2**, 991-  
660 1001, doi:10.1016/j.celrep.2012.09.011 (2012).
- 661 27 Hamasaka, Y. *et al.* Glutamate and its metabotropic receptor in *Drosophila* clock neuron  
662 circuits. *J Comp Neurol* **505**, 32-45, doi:10.1002/cne.21471 (2007).
- 663 28 Shafer, O. T., Helfrich-Forster, C., Renn, S. C. & Taghert, P. H. Reevaluation of *Drosophila*  
664 *melanogaster*'s neuronal circadian pacemakers reveals new neuronal classes. *J Comp*  
665 *Neurol* **498**, 180-193, doi:10.1002/cne.21021 (2006).
- 666 29 Fujiwara, Y. *et al.* The CCHamide1 Neuropeptide Expressed in the Anterior Dorsal  
667 Neuron 1 Conveys a Circadian Signal to the Ventral Lateral Neurons in *Drosophila*  
668 *melanogaster*. *Front Physiol* **9**, 1276, doi:10.3389/fphys.2018.01276 (2018).
- 669 30 Alpert, M. H. *et al.* A Circuit Encoding Absolute Cold Temperature in *Drosophila*. *Curr*  
670 *Biol*, doi:10.1016/j.cub.2020.04.038 (2020).
- 671 31 Ribeiro, I. M. A. *et al.* Visual Projection Neurons Mediating Directed Courtship in  
672 *Drosophila*. *Cell* **174**, 607-621 e618, doi:10.1016/j.cell.2018.06.020 (2018).
- 673 32 Markow, T. A. & Manning, M. Mating success of photoreceptor mutants of *Drosophila*  
674 *melanogaster*. *Behav Neural Biol* **29**, 276-280, doi:10.1016/s0163-1047(80)90612-3  
675 (1980).
- 676 33 Choi, C. *et al.* Cellular dissection of circadian peptide signals with genetically encoded  
677 membrane-tethered ligands. *Curr Biol* **19**, 1167-1175, doi:10.1016/j.cub.2009.06.029  
678 (2009).
- 679 34 Choi, C. & Nitabach, M. N. Membrane-tethered ligands: tools for cell-autonomous  
680 pharmacological manipulation of biological circuits. *Physiology (Bethesda)* **28**, 164-171,  
681 doi:10.1152/physiol.00056.2012 (2013).
- 682 35 Im, S. H., Li, W. & Taghert, P. H. PDFR and CRY signaling converge in a subset of clock  
683 neurons to modulate the amplitude and phase of circadian behavior in *Drosophila*. *PLoS*  
684 *One* **6**, e18974, doi:10.1371/journal.pone.0018974 (2011).
- 685 36 Shafer, O. T. *et al.* Widespread receptivity to neuropeptide PDF throughout the neuronal  
686 circadian clock network of *Drosophila* revealed by real-time cyclic AMP imaging. *Neuron*  
687 **58**, 223-237, doi:10.1016/j.neuron.2008.02.018 (2008).
- 688 37 Nicolai, L. J. *et al.* Genetically encoded dendritic marker sheds light on neuronal  
689 connectivity in *Drosophila*. *Proc Natl Acad Sci U S A* **107**, 20553-20558,  
690 doi:10.1073/pnas.1010198107 (2010).
- 691 38 Zhang, Y. Q., Rodesch, C. K. & Broadie, K. Living synaptic vesicle marker: synaptotagmin-  
692 GFP. *Genesis* **34**, 142-145, doi:10.1002/gene.10144 (2002).
- 693 39 Talay, M. *et al.* Transsynaptic Mapping of Second-Order Taste Neurons in Flies by trans-  
694 Tango. *Neuron* **96**, 783-795 e784, doi:10.1016/j.neuron.2017.10.011 (2017).
- 695 40 Lima, S. Q. & Miesenböck, G. Remote control of behavior through genetically targeted  
696 photostimulation of neurons. *Cell* **121**, 141-152, doi:10.1016/j.cell.2005.02.004 (2005).
- 697 41 Yao, Z., Macara, A. M., Lelito, K. R., Minosyan, T. Y. & Shafer, O. T. Analysis of functional  
698 neuronal connectivity in the *Drosophila* brain. *J Neurophysiol* **108**, 684-696,  
699 doi:10.1152/jn.00110.2012 (2012).

- 700 42 Chen, T. W. *et al.* Ultrasensitive fluorescent proteins for imaging neuronal activity.  
701 *Nature* **499**, 295-300, doi:10.1038/nature12354 (2013).
- 702 43 Fernandez, M. P., Berni, J. & Ceriani, M. F. Circadian remodeling of neuronal circuits  
703 involved in rhythmic behavior. *PLoS Biol* **6**, e69, doi:10.1371/journal.pbio.0060069  
704 (2008).
- 705 44 Sivachenko, A., Li, Y., Abruzzi, K. C. & Rosbash, M. The transcription factor Mef2 links the  
706 *Drosophila* core clock to Fas2, neuronal morphology, and circadian behavior. *Neuron* **79**,  
707 281-292, doi:10.1016/j.neuron.2013.05.015 (2013).
- 708 45 Gorostiza, E. A., Depetris-Chauvin, A., Frenkel, L., Pirez, N. & Ceriani, M. F. Circadian  
709 pacemaker neurons change synaptic contacts across the day. *Curr Biol* **24**, 2161-2167,  
710 doi:10.1016/j.cub.2014.07.063 (2014).
- 711 46 Petsakou, A., Sapsis, T. P. & Blau, J. Circadian Rhythms in Rho1 Activity Regulate  
712 Neuronal Plasticity and Network Hierarchy. *Cell* **162**, 823-835,  
713 doi:10.1016/j.cell.2015.07.010 (2015).
- 714 47 Agrawal, P. & Hardin, P. E. The *Drosophila* Receptor Protein Tyrosine Phosphatase LAR Is  
715 Required for Development of Circadian Pacemaker Neuron Processes That Support  
716 Rhythmic Activity in Constant Darkness But Not during Light/Dark Cycles. *J Neurosci* **36**,  
717 3860-3870, doi:10.1523/JNEUROSCI.4523-15.2016 (2016).
- 718 48 Prakash, P., Nambiar, A. & Sheeba, V. Oscillating PDF in termini of circadian pacemaker  
719 neurons and synchronous molecular clocks in downstream neurons are not sufficient for  
720 sustenance of activity rhythms in constant darkness. *PLoS One* **12**, e0175073,  
721 doi:10.1371/journal.pone.0175073 (2017).
- 722 49 Kula, E., Levitan, E. S., Pyza, E. & Rosbash, M. PDF cycling in the dorsal protocerebrum of  
723 the *Drosophila* brain is not necessary for circadian clock function. *J Biol Rhythms* **21**,  
724 104-117, doi:10.1177/0748730405285715 (2006).
- 725 50 Muraro, N. I., Pirez, N. & Ceriani, M. F. The circadian system: plasticity at many levels.  
726 *Neuroscience* **247**, 280-293, doi:10.1016/j.neuroscience.2013.05.036 (2013).
- 727 51 Fernandez, M. P. *et al.* Sites of Circadian Clock Neuron Plasticity Mediate Sensory  
728 Integration and Entrainment. *Curr Biol*, doi:10.1016/j.cub.2020.04.025 (2020).
- 729 52 Wu, Y., Cao, G. & Nitabach, M. N. Electrical silencing of PDF neurons advances the phase  
730 of non-PDF clock neurons in *Drosophila*. *J Biol Rhythms* **23**, 117-128,  
731 doi:10.1177/0748730407312984 (2008).
- 732 53 Dajani, D. R. & Uddin, L. Q. Demystifying cognitive flexibility: Implications for clinical and  
733 developmental neuroscience. *Trends Neurosci* **38**, 571-578,  
734 doi:10.1016/j.tins.2015.07.003 (2015).
- 735 54 Liu, Q. *et al.* Branch-specific plasticity of a bifunctional dopamine circuit encodes protein  
736 hunger. *Science* **356**, 534-539, doi:10.1126/science.aal3245 (2017).
- 737 55 Hart, M. P. & Hobert, O. Neurexin controls plasticity of a mature, sexually dimorphic  
738 neuron. *Nature* **553**, 165-170, doi:10.1038/nature25192 (2018).
- 739 56 Farris, S. M., Robinson, G. E. & Fahrbach, S. E. Experience- and age-related outgrowth of  
740 intrinsic neurons in the mushroom bodies of the adult worker honeybee. *J Neurosci* **21**,  
741 6395-6404 (2001).
- 742 57 Kim, S. S., Rouault, H., Druckmann, S. & Jayaraman, V. Ring attractor dynamics in the  
743 *Drosophila* central brain. *Science* **356**, 849-853, doi:10.1126/science.aal4835 (2017).

- 744 58 Liang, X. *et al.* Morning and Evening Circadian Pacemakers Independently Drive  
745 Premotor Centers via a Specific Dopamine Relay. *Neuron* **102**, 843-857 e844,  
746 doi:10.1016/j.neuron.2019.03.028 (2019).
- 747 59 Potdar, S. & Sheeba, V. Wakefulness Is Promoted during Day Time by PDFR Signalling to  
748 Dopaminergic Neurons in *Drosophila melanogaster*. *eNeuro* **5**,  
749 doi:10.1523/ENEURO.0129-18.2018 (2018).
- 750 60 Gorska-Andrzejak, J., Chwastek, E. M., Walkowicz, L. & Witek, K. On Variations in the  
751 Level of PER in Glial Clocks of *Drosophila* Optic Lobe and Its Negative Regulation by PDF  
752 Signaling. *Front Physiol* **9**, 230, doi:10.3389/fphys.2018.00230 (2018).
- 753 61 Park, J. H. *et al.* Differential regulation of circadian pacemaker output by separate clock  
754 genes in *Drosophila*. *Proc Natl Acad Sci U S A* **97**, 3608-3613,  
755 doi:10.1073/pnas.070036197 (2000).
- 756 62 Ni, J. Q. *et al.* Vector and parameters for targeted transgenic RNA interference in  
757 *Drosophila melanogaster*. *Nat Methods* **5**, 49-51, doi:10.1038/nmeth1146 (2008).
- 758 63 Pfeiffer, B. D. *et al.* Refinement of tools for targeted gene expression in *Drosophila*.  
759 *Genetics* **186**, 735-755, doi:10.1534/genetics.110.119917 (2010).
- 760 64 Mauss, A. S., Busch, C. & Borst, A. Optogenetic Neuronal Silencing in *Drosophila* during  
761 Visual Processing. *Sci Rep* **7**, 13823, doi:10.1038/s41598-017-14076-7 (2017).
- 762 65 Zhang, S. X., Rogulja, D. & Crickmore, M. A. Dopaminergic Circuitry Underlying Mating  
763 Drive. *Neuron* **91**, 168-181, doi:10.1016/j.neuron.2016.05.020 (2016).
- 764 66 Boutros, C. L., Miner, L. E., Mazor, O. & Zhang, S. X. Measuring and Altering Mating Drive  
765 in Male *Drosophila melanogaster*. *J Vis Exp*, doi:10.3791/55291 (2017).
- 766 67 Tayler, T. D., Pacheco, D. A., Hergarden, A. C., Murthy, M. & Anderson, D. J. A  
767 neuropeptide circuit that coordinates sperm transfer and copulation duration in  
768 *Drosophila*. *Proc Natl Acad Sci U S A* **109**, 20697-20702, doi:10.1073/pnas.1218246109  
769 (2012).
- 770 68 Veenstra, J. A. & Ida, T. More *Drosophila* enteroendocrine peptides: Orcokinin B and the  
771 CCHamides 1 and 2. *Cell Tissue Res* **357**, 607-621, doi:10.1007/s00441-014-1880-2  
772 (2014).
- 773 69 Busza, A., Emery-Le, M., Rosbash, M. & Emery, P. Roles of the two *Drosophila*  
774 CRYPTOCHROME structural domains in circadian photoreception. *Science* **304**, 1503-  
775 1506, doi:10.1126/science.1096973 (2004).
- 776 70 Berndt, A. *et al.* A novel photoreaction mechanism for the circadian blue light  
777 photoreceptor *Drosophila* cryptochrome. *J Biol Chem* **282**, 13011-13021,  
778 doi:10.1074/jbc.M608872200 (2007).
- 779 71 VanVickle-Chavez, S. J. & Van Gelder, R. N. Action spectrum of *Drosophila*  
780 cryptochrome. *J Biol Chem* **282**, 10561-10566, doi:10.1074/jbc.M609314200 (2007).
- 781 72 Hanai, S., Hamasaka, Y. & Ishida, N. Circadian entrainment to red light in *Drosophila*:  
782 requirement of Rhodopsin 1 and Rhodopsin 6. *Neuroreport* **19**, 1441-1444,  
783 doi:10.1097/WNR.0b013e32830e4961 (2008).
- 784 73 Fogle, K. J., Parson, K. G., Dahm, N. A. & Holmes, T. C. CRYPTOCHROME is a blue-light  
785 sensor that regulates neuronal firing rate. *Science* **331**, 1409-1413,  
786 doi:10.1126/science.1199702 (2011).



- 787 74 Fogle, K. J. *et al.* CRYPTOCHROME-mediated phototransduction by modulation of the  
788 potassium ion channel beta-subunit redox sensor. *Proc Natl Acad Sci U S A* **112**, 2245-  
789 2250, doi:10.1073/pnas.1416586112 (2015).
- 790 75 Hendricks, J. C. *et al.* Rest in *Drosophila* is a sleep-like state. *Neuron* **25**, 129-138 (2000).
- 791 76 Shaw, P. J., Cirelli, C., Greenspan, R. J. & Tononi, G. Correlates of sleep and waking in  
792 *Drosophila melanogaster*. *Science* **287**, 1834-1837 (2000).
- 793 77 Klarsfeld, A., Leloup, J.-C. & Rouyer, F. Circadian rhythms of locomotor activity in  
794 *Drosophila*. *Behavioural Processes* **64**, 161-175, doi:10.1016/s0376-6357(03)00133-5  
795 (2003).
- 796 78 Zielinski, T., Moore, A. M., Troup, E., Halliday, K. J. & Millar, A. J. Strengths and  
797 limitations of period estimation methods for circadian data. *PLoS One* **9**, e96462,  
798 doi:10.1371/journal.pone.0096462 (2014).
- 799 79 Houl, J. H., Ng, F., Taylor, P. & Hardin, P. E. CLOCK expression identifies developing  
800 circadian oscillator neurons in the brains of *Drosophila* embryos. *BMC Neurosci* **9**, 119,  
801 doi:10.1186/1471-2202-9-119 (2008).
- 802 80 Shafer, O. T., Rosbash, M. & Truman, J. W. Sequential nuclear accumulation of the clock  
803 proteins period and timeless in the pacemaker neurons of *Drosophila melanogaster*. *J*  
804 *Neurosci* **22**, 5946-5954, doi:20026628 (2002).
- 805 81 Siwicki, K. K., Eastman, C., Petersen, G., Rosbash, M. & Hall, J. C. Antibodies to the  
806 period gene product of *Drosophila* reveal diverse tissue distribution and rhythmic  
807 changes in the visual system. *Neuron* **1**, 141-150, doi:10.1016/0896-6273(88)90198-5  
808 (1988).
- 809 82 Zerr, D. M., Hall, J. C., Rosbash, M. & Siwicki, K. K. Circadian fluctuations of period  
810 protein immunoreactivity in the CNS and the visual system of *Drosophila*. *J Neurosci* **10**,  
811 2749-2762 (1990).
- 812 83 Shafer, O. T. & Taghert, P. H. RNA-interference knockdown of *Drosophila* pigment  
813 dispersing factor in neuronal subsets: the anatomical basis of a neuropeptide's circadian  
814 functions. *PLoS One* **4**, e8298, doi:10.1371/journal.pone.0008298 (2009).
- 815 84 Baines, R. A., Uhler, J. P., Thompson, A., Sweeney, S. T. & Bate, M. Altered electrical  
816 properties in *Drosophila* neurons developing without synaptic transmission. *J Neurosci*  
817 **21**, 1523-1531 (2001).

818

819

820 **EXTENDED DATA**

**Extended Data Figure 1**

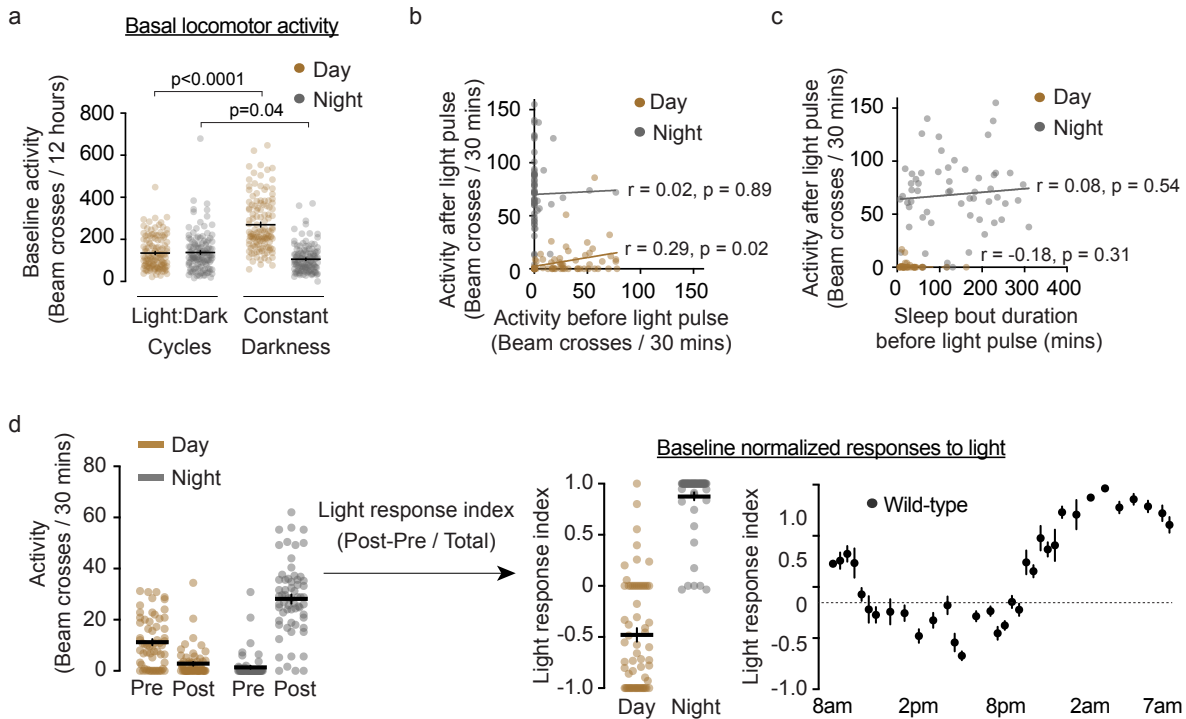

821

822 **Extended Data Figure 1. Light responsiveness is independent of circadian fluctuations in**

823 **baseline locomotion. (a)** Basal locomotor activity is higher in constant darkness than in light-

824 dark cycles, but only during daytime. **(b)** Pre-pulse locomotor activity weakly correlates with

825 activity during the pulse given mid-day ( $p=0.02$ ). Pre-pulse locomotor activity does not correlate

826 with activity during the pulse given mid-night ( $p=0.89$ ). **(c)** Sleep bout duration prior to the light

827 pulse does not correlate with behavioral response during the mid-day ( $p=0.31$ ) or mid-night

828 ( $p=0.54$ ). (a-c) show the same flies as Fig.1, a-c. **(d)** Activity normalized to baseline still shows

829 two distinct states. Same flies as Fig. 1c.

## Extended Data Figure 2

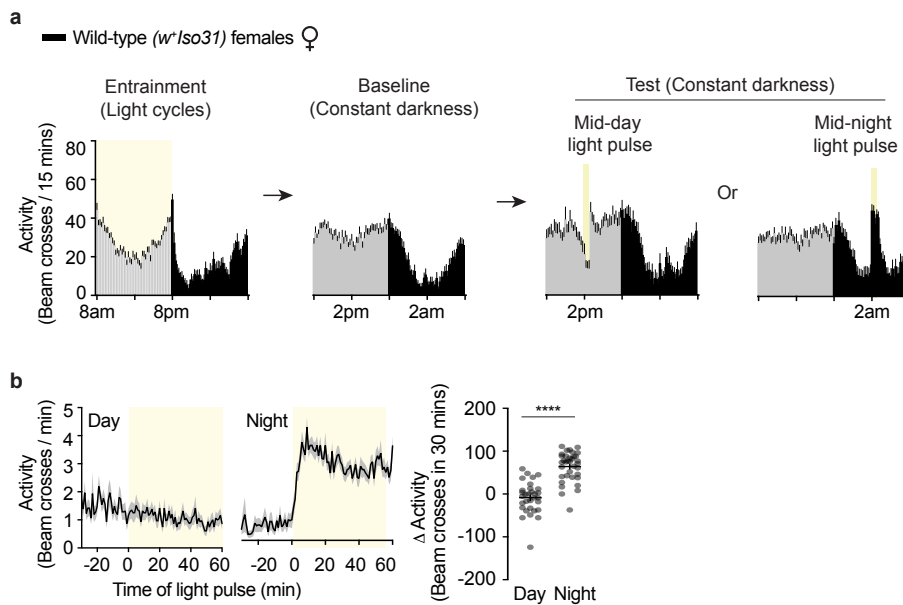

830

831 **Extended Data Figure 2. Female flies also respond to light differently during the daytime**  
832 **vs nighttime. (a)** Experimental setup. Virgin female *w<sup>+</sup>iso31* flies underwent the same  
833 treatment shown in Fig. 1a. For entrainment and baseline, 24 hours of activity are shown. **(b)**  
834 Left, Averaged activity 30 minutes prior to, and during, the 60 minute light probe. Right,  
835 quantification of light-evoked change in activity.

### Extended Data Figure 3

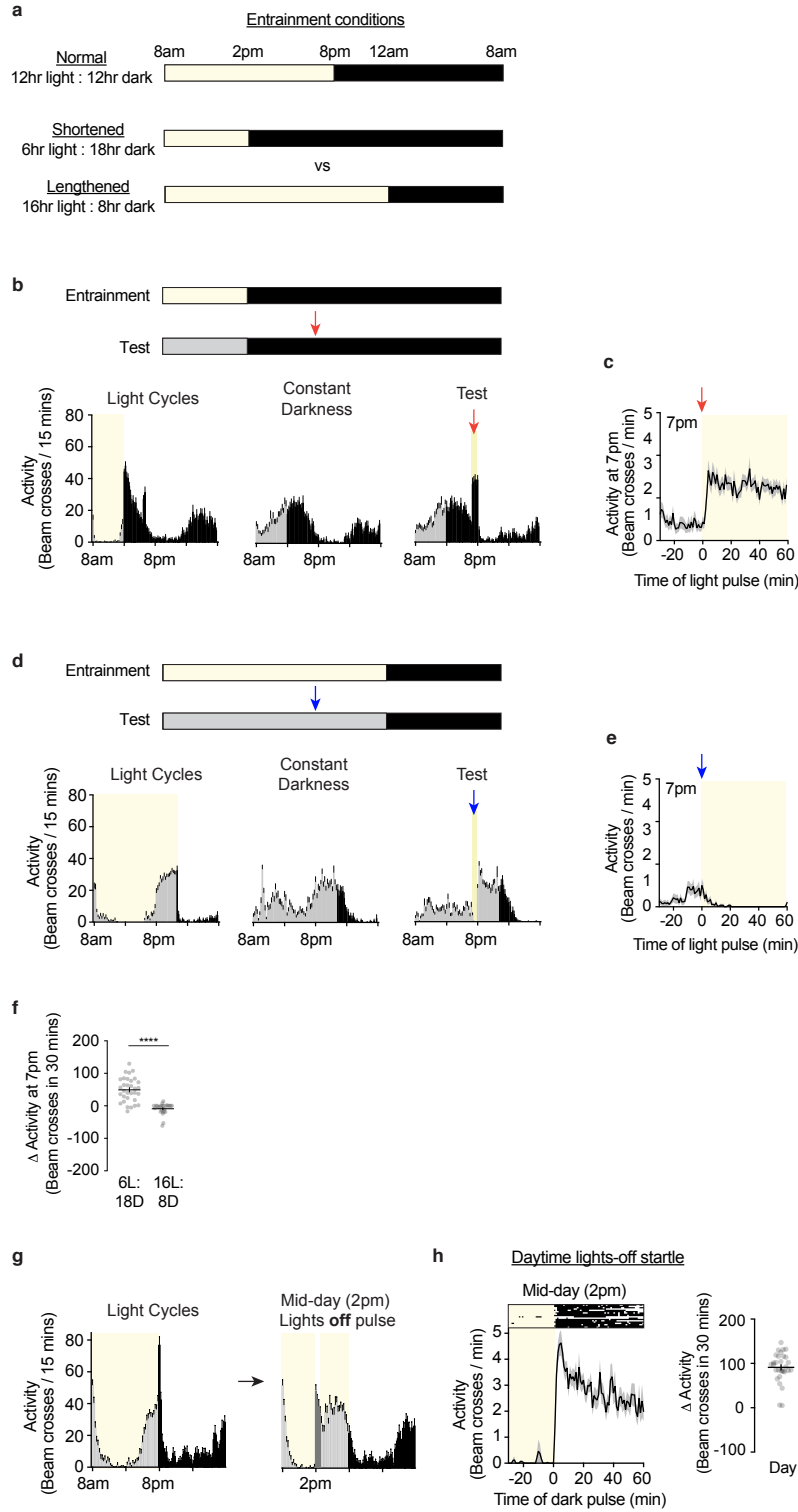

836

837 **Extended Data Figure 3. Locomotor responses to light are instructed by prior**  
838 **entrainment experience. Darkness during daytime acutely evokes locomotor activity. (a)**

839 The top rows show the standard entrainment protocol used in all other experiments. The bottom  
840 two rows show alternative light-dark entrainment cycles. In (a-e), yellow bars indicate when  
841 lights are on, black bars indicate when lights are off, and grey bars indicate subjective daytime  
842 in constant darkness. **(b)** 6 hour light : 18 hour dark conditions were used for entrainment and  
843 flies were subsequently tested in constant darkness with a one-hour light pulse. Arrows indicate  
844 time of light onset. **(c)** A light pulse at 7pm evokes locomotor activity for flies entrained in 6:18  
845 light:dark cycles. **(d)** Flies were entrained to 16 hour light : 8 hour dark conditions before testing.  
846 **(e)** A light pulse at 7pm suppresses locomotor activity for flies entrained to 16:8 light:dark  
847 cycles. **(f)** Quantification of differences between light-evoked responses at 7pm for flies  
848 entrained to 6:18 or 16:8 light:dark cycles. **(g)** Experimental protocol for testing the effect of  
849 acute darkness during daytime. Vertical bars: 15 minute locomotor activity bins. Yellow indicates  
850 light. Unlike for experiments shown in other figures, flies were not in constant darkness but only  
851 in light-dark cycles. On the experimental day, lights were turned off for 1 hour between 2pm and  
852 3pm. **(h)** Lights-off during the daytime elicits startle. Top, representative individual raster plots.  
853 Bottom, averaged activity prior to and during the dark probe.

#### Extended Data Figure 4

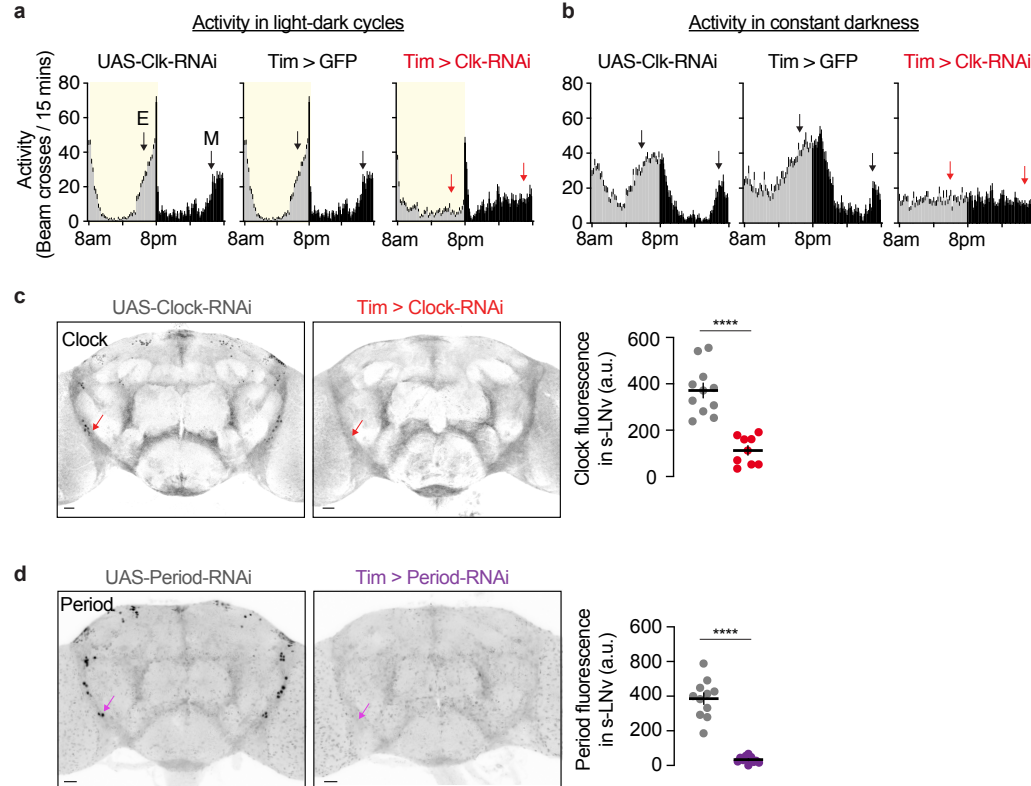

854

855 **Extended Data Figure 4. Testing the efficacy of Clock- and Period- RNAi** (a) 24-hour activity  
856 profiles in light-dark cycles show that targeting the core circadian protein Clock (Clk) by Tim-Gal4-  
857 driven RNAi prevents anticipatory locomotor activity (i.e. the ramp-up of activity that occurs prior  
858 to lights turning on (morning anticipation, M) or off (evening anticipation, E). Arrows indicate the  
859 presence (black) or absence (red) of anticipation. (b) 24-hour locomotor activity profiles in  
860 constant darkness show arrhythmicity when the clock is disrupted. (c) Evidence that Clk-RNAi  
861 effectively depletes Clock protein. Clock staining was arbitrarily performed at ZT6 since Clock  
862 protein levels are detectable throughout the day<sup>79</sup>. (d) Confirmation that Per-RNAi effectively  
863 depletes Per protein. Period staining was performed at 9am (Zeitgeber Time 1, ZT1), since Period  
864 expression oscillates in controls and is near peak levels during this time<sup>80</sup>. Period staining is broad  
865 because of glial expression<sup>81,82</sup>.

## Extended Data Figure 5

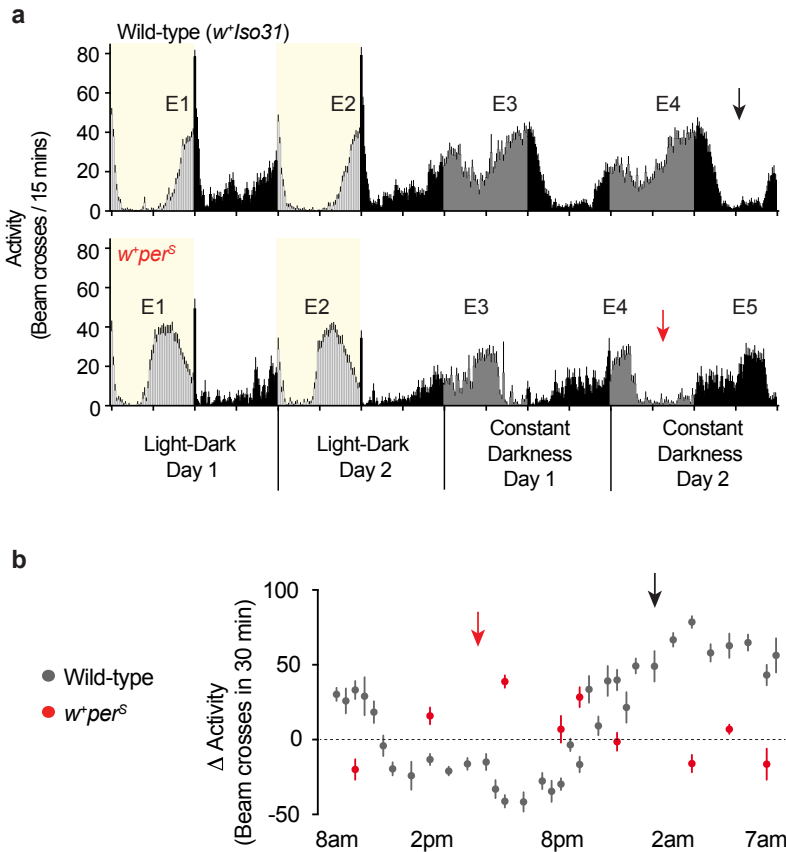

866

867 **Extended Data Figure 5. The timing of light responsiveness is controlled by circadian**  
868 **clocks. (a)** A mutation in *period* (*period<sup>Short</sup>* or *per<sup>S</sup>*) accelerates circadian rhythms. E# indicates  
869 corresponding peaks of evening activity between control and mutant flies. Arrows indicate  
870 comparable timepoints - subjective nighttime after the fourth peak of evening activity. **(b)** This  
871 mutation also accelerates the timecourse of light responsiveness. Same control flies as in Fig. 1c.

## Extended Data Figure 6

a

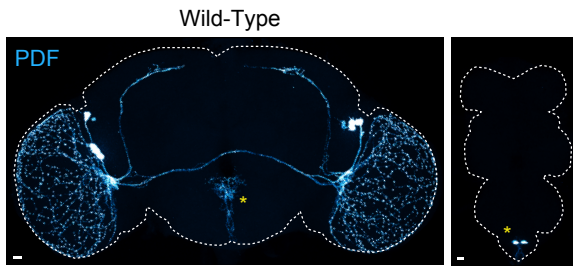

b

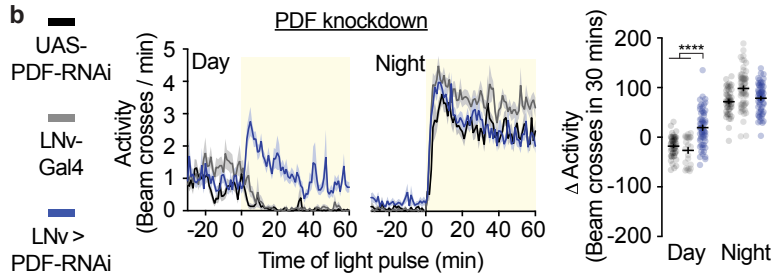

c

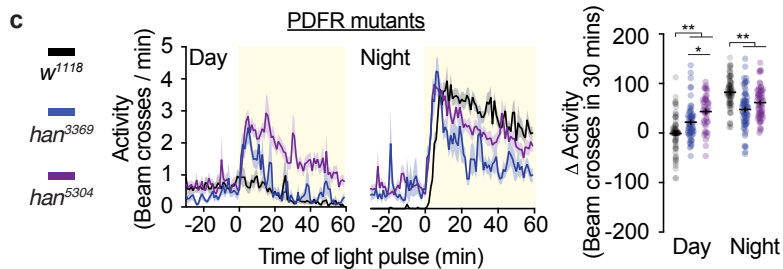

872

873 **Extended Data Figure 6. PDF in LNVs is required for normal daytime, but not nighttime,**  
874 **light reactivity. (a)** Expression pattern of PDF in the brain and VNC. Asterisks indicate variable  
875 expression in the midline of the brain and non-circadian neurons<sup>83</sup> in the VNC. **(b)** Knockdown of  
876 PDF in LNVs perturbs only daytime light responsiveness. **(c)** Two hypomorphic mutations of PDF  
877 receptor (PDFR) show perturbed responsiveness to daytime light. Though nighttime light  
878 responses differ from controls, peak responses to nighttime light are similar to wild-type.



**Extended Data Figure 7**

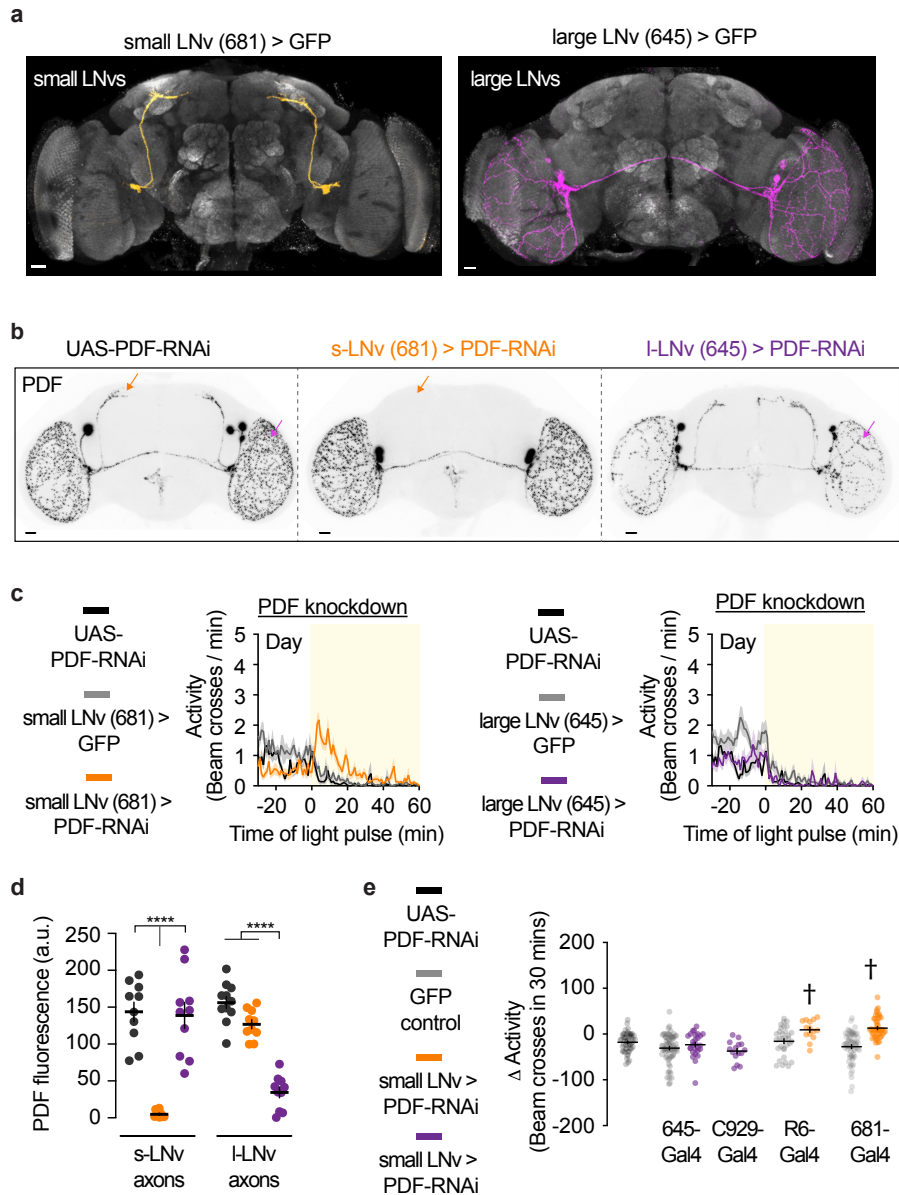

879

880 **Extended Data Figure 7. PDF from small LNvs is required for normal daytime light**  
 881 **reactivity. (a)** Expression patterns of Gal4 drivers in small (JRC\_SS00681-Gal4) or large  
 882 (JRC\_SS00645-Gal4) LNv subpopulations. **(b)** Representative PDF expression patterns when  
 883 PDF-RNAi was driven in either small or large LNv subpopulations. Arrows indicate quantified  
 884 regions in (d). Note that PDF was not completely depleted by I-LNv-Gal4-driven RNAi. **(c)** PDF  
 885 knockdown shows that small LNvs (681-Gal4) are a necessary source of daytime PDF. UAS-  
 886 PDF-RNAi controls (black) are duplicated between left and right panels. **(d)** Quantification of  
 887 PDF immunostaining intensity in s-LNv dorsal axons or I-LNv axons in the optic lobe. **(e)** Light-

888 evoked change in activity using two s-LNv and two l-LNv drivers to express PDF-RNAi. One-  
889 way ANOVA of daytime light responses, with Tukey's post hoc test. Cross symbols within panel  
890 indicate significance ( $p < .05$ ) versus all other conditions, aside from each other.

## Extended Data Figure 8

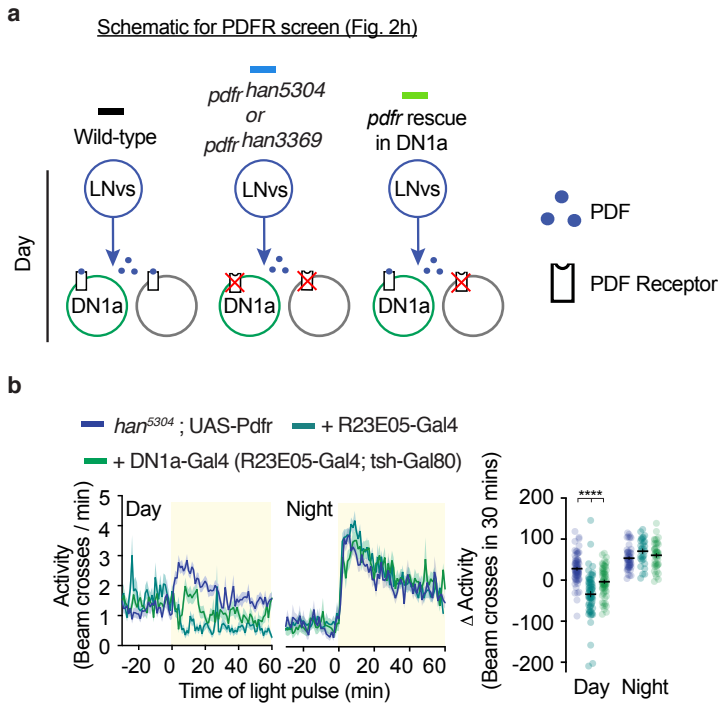

891

892 **Extended Data Figure 8. Additional details about PDFR rescue screen (a)** Schematic of  
893 experiment in Fig. 2d. **(b)** Activity traces for flies in which PDFR was expressed using R23E05-  
894 Gal4 (dark green) or DN1a-Gal4 (light green) in the *han*<sup>5304</sup> *pdfr* mutant background. This  
895 experiment, done in the *han*<sup>3369</sup> *pdfr* mutant background is shown in Fig. 2d.

Extended Data Figure 9

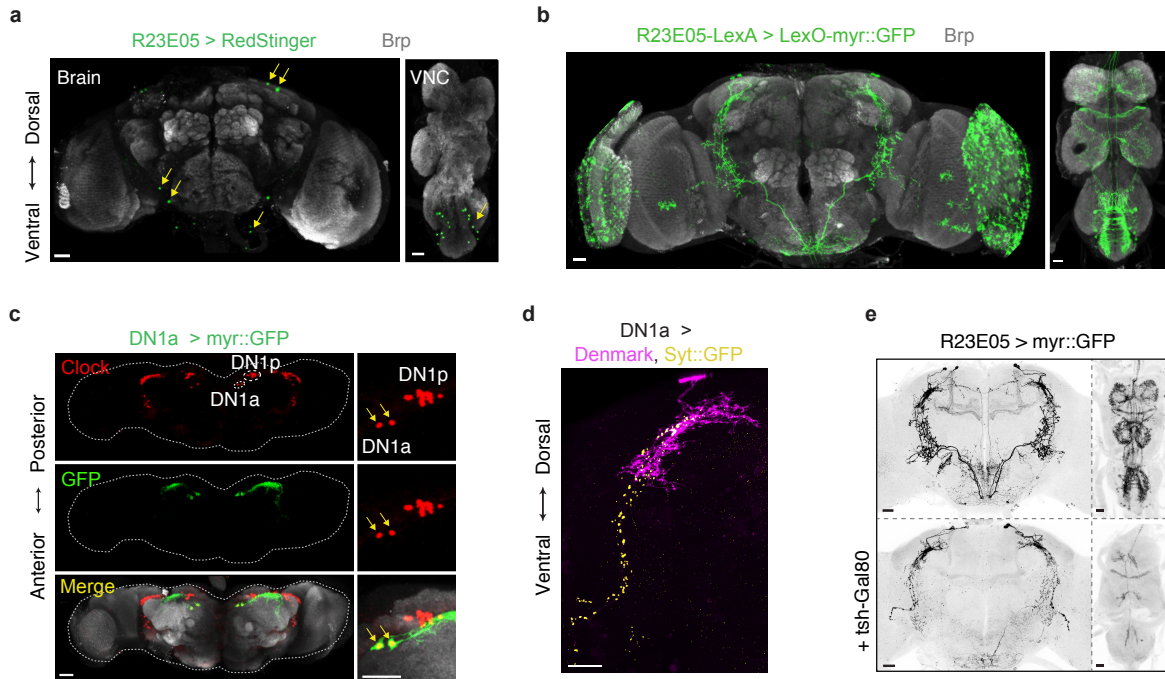

896

897 **Extended Data Figure 9. Additional anatomical and behavioral characterization of**  
 898 **R23E05-Gal4.** (a) R23E05-Gal4 driving the nuclear reporter RedStinger. The nervous system  
 899 expression includes 2 DN1as, 2 neurons in the saddle, 1 cell in the inferior posterior slope, and  
 900 ~10 neurons in the ventral nerve cord, per hemisphere. With some reporters, we saw weak  
 901 expression in the mushroom body. (b) Expression pattern of R23E05-LexA. We saw strong  
 902 expression in the lamina, which was not seen with R23E05-Gal4. (c) Dorsal view of DN1a-Gal4  
 903 expression pattern confirms expression in anterior, and not posterior, DN1 subpopulations. (d)  
 904 DN1a-Gal4 driving markers of postsynaptic sites (Denmark) and presynaptic sites  
 905 (Synaptotagmin::GFP, Syt::GFP). (e) Restriction of R23E05 primarily to DN1as using teashirt-  
 906 Gal80 (tsh-Gal80). Expression was diminished in most VNC neurons and in some central brain  
 907 neurons.

**Extended Data Figure 10**

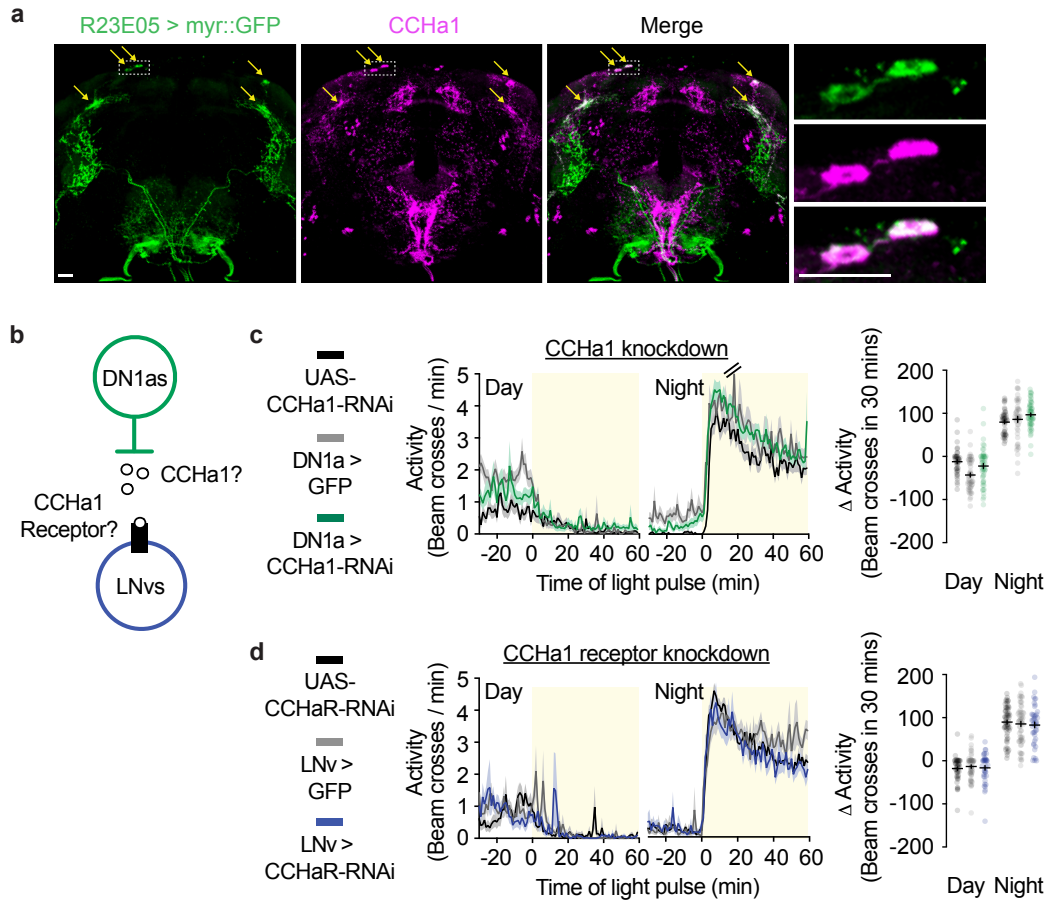

908

909 **Extended Data Figure 10. The peptide CCHA1 is not the relevant nighttime DN1a-to-LNv**

910 **signal. (a) Co-staining of CCHA1 with GFP in DN1as. (b) Schematic of DN1a-to-LNv**

911 **communication via CCHA1. (c) RNAi against CCHA1 in DN1as does not mimic the effects of**

912 **DN1a silencing. (d) RNAi against CCHA1 receptor in LNvs does not mimic the effects of DN1a**

913 **silencing.**

## Extended Data Figure 11

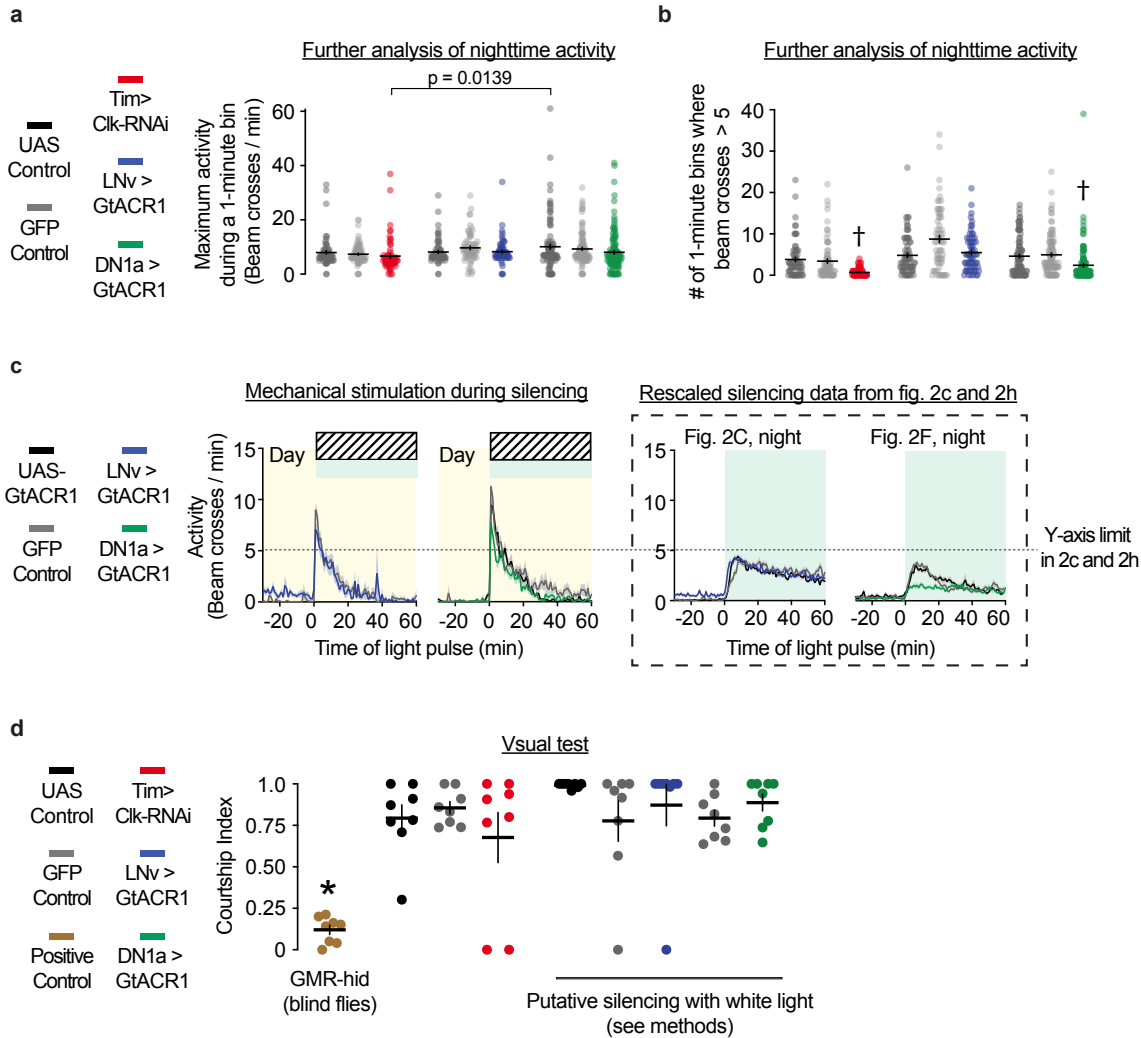

914

915 **Extended Data Figure 11. Manipulating LNV or DN1a activity does not cause general**

916 **visual or locomotor defects. (a)** Left, peak locomotor activity per 1-minute bin, during

917 nighttime light pulses (same flies as Fig. 1g) or during nighttime optogenetic silencing (same

918 flies as Fig 2c and Fig. 2h). Right, number of high activity bouts (animals cross the middle of the

919 tube more than 5 times per 1-minute bin). Cross symbols within panel indicate significance

920 against all other conditions (except against each other). The LNV > GFP control genotype had

921 significantly more high-activity bouts than all other conditions, which is not indicated in the

922 figure. One-way ANOVA with Tukey's post hoc test. **(G)** Mechanical stimulation of LNV-silenced

923 and DN1a-silenced flies shows that all genotypes are capable of reaching high levels of

924 locomotion. **(H)** Courtship of clock-disrupted flies and subpopulation-silenced flies, which is

925 compared to GMR-hid flies, a positive control with visual defects. See methods for details about

926 optogenetics during courtship.

## Extended Data Figure 12

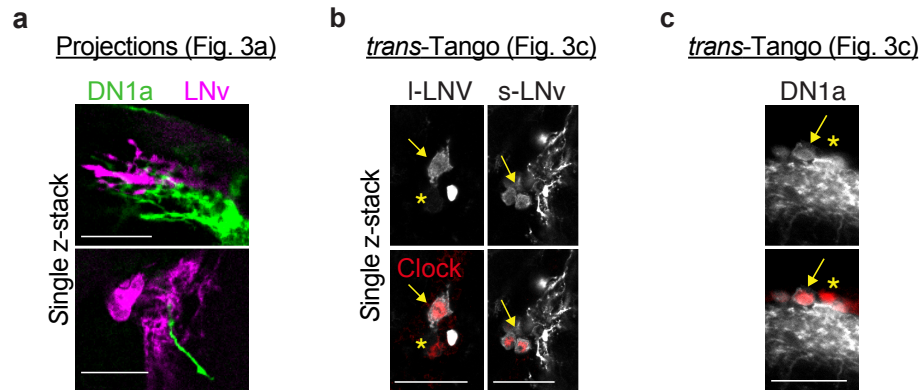

927

928 **Extended Data Figure 12. Additional data for mutual connectivity experiments. (a)** Single  
929 confocal z-stacks with imaging depths of 0.3  $\mu\text{m}$  show proximity of LNV and DN1a terminals **(b)**  
930 Single confocal z-stacks show specificity of DN1a->LNV *trans*-Tango experiments. **(c)** Single  
931 confocal z-stacks show specificity of LNV->DN1a *trans*-Tango experiments.

Extended Data Figure 13

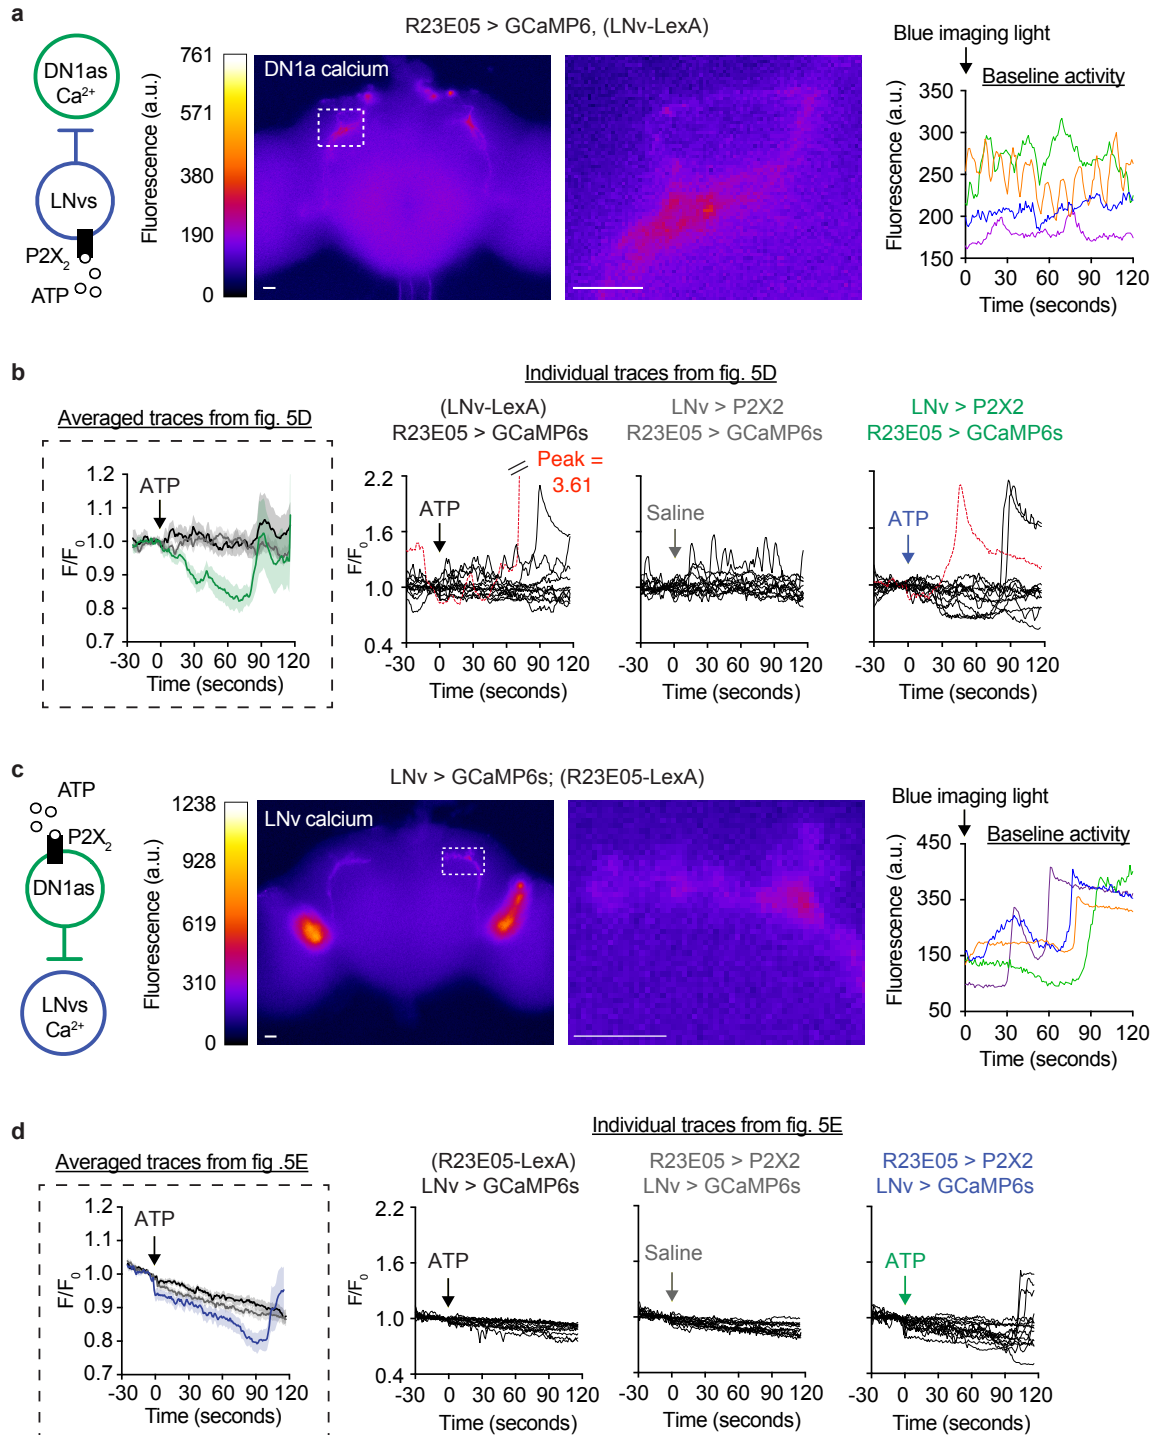

932

933 **Extended Data Figure 13. Additional data for functional imaging. (a)** Left, representative

934 fields of view during LNv-to-DN1a circuit tracing experiment. Dashed box shows magnified

935 DN1a dendritic region selected for analysis. DN1a dendrites and LNv axons were chosen for



936 analysis because these regions were consistently identifiable, whereas DN1a axons and LNV  
937 dendrites were not usually visible with GCaMP6s. Left, representative baseline calcium  
938 fluctuations in DN1as before ATP stimulation. Right, representative calcium fluctuations in DN1a  
939 dendrites during two minutes of baseline imaging before ATP stimulation. Each color shows an  
940 independent trial. **(b)** All trials for experiments shown in Fig. 3d. Red traces are one  
941 experimental and one control trial that were excluded from analysis because of non-  
942 representative depolarizations (see methods for more details). **(c)** Left, representative fields of  
943 view during DN1a-to-LNV circuit tracing experiments. Inset represents LNV axonal area selected  
944 for analysis. Dashed box shows magnified region of analysis in LNV axons. Right,  
945 representative calcium fluctuations in LNV axons during two minutes of baseline imaging before  
946 ATP stimulation. Each color shows an independent trial. **(d)** All trials for experiments shown in  
947 Fig. 3e.

## Extended Data Figure 14

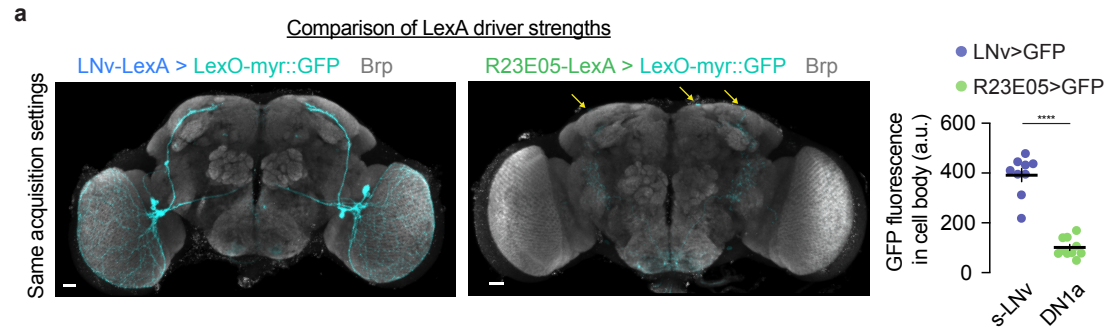

948

949 **Extended Data Figure 14. Comparisons of LexA driver strengths used for chemogenic**  
950 **stimulation in Figure 3. (a)** LNv-LexA and DN1a-LexA driver strengths are compared by  
951 crossing to the same reporter (LexO::myrGFP), and imaged under the same acquisition settings  
952 GFP intensity was measured in cell bodies for comparison.

**Extended Data Figure 15**

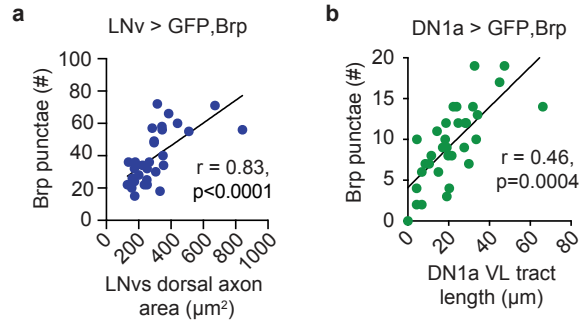

953

954 **Extended Data Figure 15. Additional information related to plasticity patterns. (a)** s-LNV  
955 synapse number as a function of s-LNV axon area. **(b)** DN1a synapse number as a function of  
956 DN1a axon length. A and B are reanalyses of the same animals shown in Fig. 4b.

**Extended Data Figure 16**

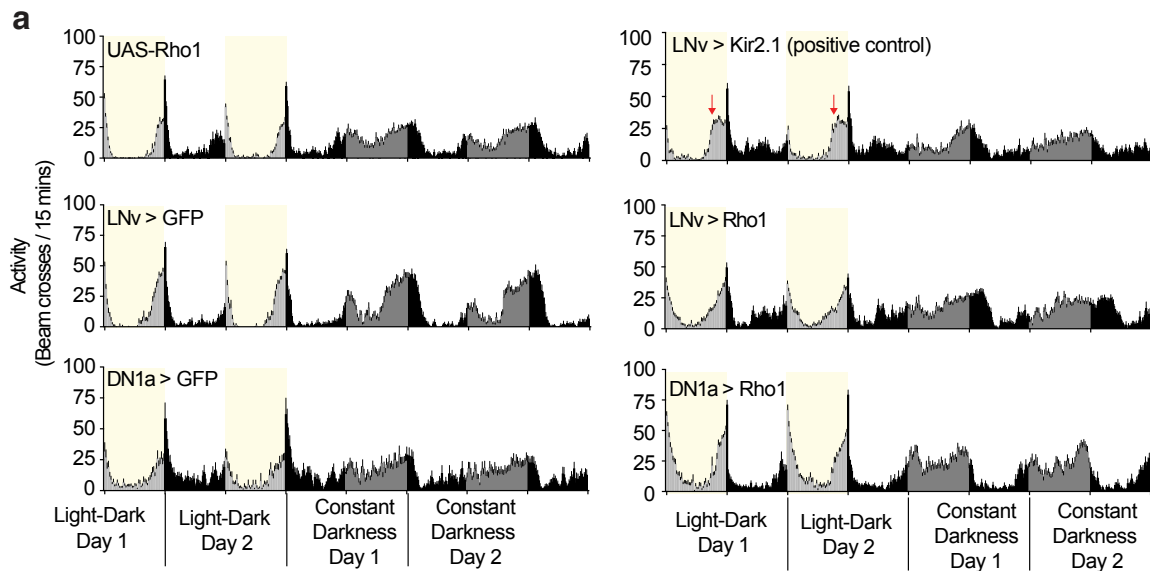

957

958 **Extended Data Figure 16. Additional information related to plasticity patterns. (a)** Rho1  
959 overexpression does not overtly perturb rhythmic locomotor activity. Locomotor activity of flies  
960 expressing Rho1 in LNvs or DN1as, across two days in light-dark cycles and two days in  
961 continual darkness. Red asterisks indicate advanced evening activity that occurs when LNvs are  
962 constitutively silenced using overexpression of inwardly rectifying potassium channel Kir2.1<sup>84</sup>.

963 **Extended Data Video 1. Circadian light reactivity in wild-type flies.** Light pulse presented to  
 964 wild-type ( $w^+iso31$ ) flies. Flies are in glass tubes with food on one end (outer end of the frame),  
 965 and a cotton plug on the other (inner end of the frame). Lights turn on 13 seconds into the video.  
 966 Flies in left and right columns are entrained to opposite cycles. On the left side, lights turn on in  
 967 the middle of subjective day. On the right side, lights turn on in the middle of subjective night.  
 968 Video is sped up 30x.

969

970 **Extended Data Video 2. Overlapping projections of LNvs (blue) and DN1as (green).** 3D  
 971 reconstruction of confocal stacks using Imaris, shown with and without nc82 (grey). Same image  
 972 as Fig. 3a.

973

974 **Extended Data Video 3. LNv axons (blue) adjacent to DN1a dendrites (green).** 3D  
 975 reconstruction of confocal stacks using Imaris, shown with and without nc82 (grey). Same image  
 976 as Fig. 3b, left.

977

978 **Extended Data Video 4. DN1a axons (green) adjacent to LNv dendrites (blue).** 3D  
 979 reconstruction of confocal stacks using Imaris, shown with and without nc82 (grey). Same image  
 980 as Fig. 3b, right.

981

982 **Extended Data Table 1**

| Figure                                                               | Label     | Genotype     | N                                                                                                                         | Statistics |
|----------------------------------------------------------------------|-----------|--------------|---------------------------------------------------------------------------------------------------------------------------|------------|
| <b>Figure 1</b>                                                      |           |              |                                                                                                                           |            |
| Fig. 1a,<br>Left and<br>Middle (24<br>hour LD<br>and DD<br>activity) | Wild-type | $w^+, iso31$ | 125                                                                                                                       |            |
| Fig. 1a,<br>Right                                                    | Wild-type | $w^+, iso31$ | 62 (2pm), 63<br>(2am)                                                                                                     |            |
| Fig. 1b                                                              | Wild-type | $w^+, iso31$ | 63 (8am), 69<br>(2pm, Day,<br>same flies as<br>Figure 1a), 67<br>(8pm), 63<br>(2am, Night,<br>same flies as<br>Figure 1a) |            |
| Fig. 1c                                                              | Wild-type | $w^+, iso31$ | 63 (8am, same<br>flies as 1b), 25                                                                                         |            |

|                |                  |                                                                                      |                                                                                                                                                                                                                                                                                                                                                                                                                                                                                                                    |  |
|----------------|------------------|--------------------------------------------------------------------------------------|--------------------------------------------------------------------------------------------------------------------------------------------------------------------------------------------------------------------------------------------------------------------------------------------------------------------------------------------------------------------------------------------------------------------------------------------------------------------------------------------------------------------|--|
|                |                  |                                                                                      | (8:30am), 14<br>(9am), 17<br>(9:30am), 51<br>(10am), 17,<br>(10:30am), 60<br>(11am), 26<br>(12pm), 47<br>(1pm), 62<br>(2pm, same flies as 1b), 72<br>(3pm), 50<br>(4pm), 24<br>(4:30pm), 39<br>(5pm), 81<br>(6pm), 108<br>(7pm), 38<br>(7:30pm), 87<br>(8pm), 73<br>(8:30pm), 72<br>(9pm), 33<br>(9:30pm), 53<br>(10pm), 17<br>(10:30pm), 30<br>(11pm), 17<br>(11:30pm), 42<br>(12am), 17<br>(1am), 63<br>(2am, same flies as 1a and B), 62 (3am), 52 (4am), 25<br>(5am), 62<br>(6am), 31<br>(7am), 11<br>(7:30am) |  |
| Fig. 1e, left  | Tim > GFP        | w <sup>-</sup> ; Tim(UAS)-Gal4, Repo-Gal80 / UAS-myr::GFP; UAS-Dicer2 / +            | Representative sample of at least ten flies                                                                                                                                                                                                                                                                                                                                                                                                                                                                        |  |
| Fig. 1e, right | Clock            | w <sup>-</sup> ; Tim(UAS)-Gal4, Repo-Gal80 / UAS-myr::GFP; UAS-Dicer2 / +            | Representative sample of at least ten flies                                                                                                                                                                                                                                                                                                                                                                                                                                                                        |  |
| Fig. 1f, red   | Tim > Clock-RNAi | w <sup>-</sup> ; Tim(UAS)-Gal4, Repo-Gal80 / UAS-Clock-RNAi; UAS-Dicer2 / UAS-Dicer2 | 56 (8am), 31 (11am), 67 (2pm), 34 (5pm), 54 (8pm), 29 (11pm), 61 (2am), 34                                                                                                                                                                                                                                                                                                                                                                                                                                         |  |

|                 |                   |                                                                                            |                                                                                           |                                                                                                                         |
|-----------------|-------------------|--------------------------------------------------------------------------------------------|-------------------------------------------------------------------------------------------|-------------------------------------------------------------------------------------------------------------------------|
|                 |                   |                                                                                            | (5am) 51<br>(7am)                                                                         |                                                                                                                         |
| Fig. 1f, purple | Tim > Period-RNAi | w <sup>-</sup> ; Tim(UAS)-Gal4, Repo-Gal80 / UAS-Dicer2; UAS-Period-RNAi / UAS-Dicer2      | 48 (8am), 31 (11am) 58 (2pm), 12 (5pm), 60 (8pm), 20 (11pm), 61 (2am), 45 (5am), 34 (7am) |                                                                                                                         |
| Fig. 1f, black  |                   |                                                                                            | 28 (8am), 28 (11am) 77 (2pm), 29 (5pm), 23 (8pm), 44 (11pm), 75 (2am), 55 (5am), 28 (7am) |                                                                                                                         |
| Fig. 1f, grey   |                   |                                                                                            | 43 (8am), 46 (11am) 49 (2pm), 27 (5pm), 19 (8pm), 49 (11pm), 74 (2am), 32 (5am), 27 (7am) |                                                                                                                         |
| Fig. 1g, black  | UAS-Clock-RNAi    | w <sup>+</sup> ; UAS-Clock-RNAi/+; UAS-Dicer2 / +                                          | 88 (2pm), 74 (2am)                                                                        | Two-way ANOVA F(2,440)=100.4, interaction p<0.0001, with Tukey's multiple comparisons test.                             |
| Fig. 1g, grey   | Tim > GFP         | w <sup>-</sup> ; Tim(UAS)-Gal4, Repo-Gal80 / UAS-myr::GFP or UAS-mCD8::GFP; UAS-Dicer2 / + | 77 (2pm), 75 (2am)                                                                        | 2pm: UAS-control vs GFP control: p=0.0977. UAS control vs experimental: p<0.0001. GFP control vs experimental p<0.0001. |
| Fig. 1g, red    | Tim > Clock-RNAi  | w <sup>-</sup> ; Tim(UAS)-Gal4, Repo-Gal80 / UAS-Clock-RNAi; UAS-Dicer2 / UAS-Dicer2       | 67 (2pm, same flies as 1c), 61 (2am, same flies as 1c)                                    | 2am: UAS-control vs GFP control: p=0.8602. UAS control vs experimental: p<0.0001. GFP control vs experimental p<0.0001. |
| <b>Figure 2</b> |                   |                                                                                            |                                                                                           |                                                                                                                         |

|                |                                                  |                                                                                                                             |                                                                                                                        |                                                                                                                                                                                                                                                                                                                                                            |
|----------------|--------------------------------------------------|-----------------------------------------------------------------------------------------------------------------------------|------------------------------------------------------------------------------------------------------------------------|------------------------------------------------------------------------------------------------------------------------------------------------------------------------------------------------------------------------------------------------------------------------------------------------------------------------------------------------------------|
| Fig. 2a, brain | LNv > GFP                                        | w <sup>-</sup> ; Pdf-Gal4 / UAS-myr::GFP; Pdf-Gal4 / +                                                                      | Representative sample (2pm), of at least ten flies                                                                     |                                                                                                                                                                                                                                                                                                                                                            |
| Fig. 2a, VNC   | LNv > GFP                                        | w <sup>-</sup> ; Pdf-Gal4 / UAS-myr::GFP; + / +                                                                             | Representative sample (2pm), of at least five flies                                                                    |                                                                                                                                                                                                                                                                                                                                                            |
| Fig. 2b        | LNv > GFP                                        | w <sup>-</sup> ; Pdf-Gal4 / UAS-myr::GFP; Pdf-Gal4 / +                                                                      | Representative sample (2pm), of at least ten flies                                                                     |                                                                                                                                                                                                                                                                                                                                                            |
| Fig. 2c, black | UAS-GtACR1                                       | w <sup>+</sup> ; +/+; UAS-GtACR1::eYFP / +                                                                                  | 58 (2pm), 70 (2am)                                                                                                     | Two-way ANOVA F(2,365)=30.28, interaction p<0.0001, with Tukey's multiple comparisons test.<br><br>2pm: UAS-control vs GFP control: p=0.7016. UAS control vs experimental: p<0.0001. GFP control vs experimental p<0.0001.<br><br>2am: UAS-control vs GFP control: p=0.9928. UAS control vs experimental: p=0.6758. GFP control vs experimental: p=0.9411. |
| Fig. 2c, grey  | LNv > GFP                                        | w <sup>-</sup> ; Pdf-Gal4 / UAS-myr::GFP; Pdf-Gal4 / +                                                                      | 52 (2pm), 68 (2am)                                                                                                     |                                                                                                                                                                                                                                                                                                                                                            |
| Fig. 2c, blue  | LNv > GtACR1                                     | w <sup>-</sup> ; Pdf-Gal4 / +; Pdf-Gal4 / UAS-GtACR1::eYFP / +                                                              | 62 (2pm), 61 (2am)                                                                                                     |                                                                                                                                                                                                                                                                                                                                                            |
| Fig. 2d, black | Wild-type                                        | w <sup>+</sup> , <i>iso31</i>                                                                                               | 92 (2pm)                                                                                                               |                                                                                                                                                                                                                                                                                                                                                            |
| Fig. 2d, blue  | <i>pdf<sup>han</sup></i> ; UAS-Pdfr              | <i>han<sup>3369</sup></i> / y; UAS-Pdfr-16 / +; Atp2 / + and <i>han<sup>5304</sup></i> / y; UAS-Pdfr-16 / +; Atp2 / +       | 154 (2pm). 78 ( <i>han<sup>3369</sup></i> /y;UAS-Pdfr-16/+;+/+). 76 ( <i>han<sup>5304</sup></i> /y;UAS-Pdfr-16/+;+/+). |                                                                                                                                                                                                                                                                                                                                                            |
| Fig. 2d, grey  | <i>pdf<sup>han</sup></i> ; candidate-Gal4 > Pdfr | <i>han<sup>3369</sup></i> / y; Candidate-Gal4 > UAS-Pdfr-16 and <i>han<sup>5304</sup></i> / y; Candidate-Gal4 > UAS-Pdfr-16 | 274 candidate Gal4 lines                                                                                               |                                                                                                                                                                                                                                                                                                                                                            |
| Fig. 2d, green | <i>pdf<sup>han</sup></i> ; R23E05-Gal4 > Pdfr    | <i>han<sup>3369</sup></i> / y; teashirt-Gal80 / UAS-Pdfr-16; R23E05-Gal4 / + and <i>pdf<sup>han5304</sup></i> / y;          | 56 (2pm)                                                                                                               |                                                                                                                                                                                                                                                                                                                                                            |



|                     |                                                 |                                                                               |                                                    |                                                                                                                                                                                                                                                         |
|---------------------|-------------------------------------------------|-------------------------------------------------------------------------------|----------------------------------------------------|---------------------------------------------------------------------------------------------------------------------------------------------------------------------------------------------------------------------------------------------------------|
|                     |                                                 | teashirt-Gal80/UAS-Pdfr-16; R23E05-Gal4 / +                                   |                                                    |                                                                                                                                                                                                                                                         |
| Fig. 2e, blue       | <i>han</i> <sup>3369</sup> ; UAS-Pdfr           | <i>han</i> <sup>3369</sup> / y; UAS-Pdfr-16 / +; Atp2 / +                     | 78 (2pm), 45 (2am)                                 | Two-way ANOVA F(2,347)=14.10, interaction p<0.0001, with Tukey's multiple comparisons test.                                                                                                                                                             |
| Fig. 2e, dark green | <i>han</i> <sup>3369</sup> ; R23E05-Gal4 > Pdfr | <i>han</i> <sup>3369</sup> / y; UAS-Pdfr-16 / +; R23E05-Gal4 / +              | 71 (2pm), 67 (2am)                                 | 2pm: R23E05 rescue vs DN1a rescue: p=0.9993. Mutant vs R23E05 rescue: p<0.0001. Mutant vs DN1a rescue: p<0.0001.                                                                                                                                        |
| Fig. 2e, green      | <i>han</i> <sup>3369</sup> ; DN1a-Gal4 > Pdfr   | <i>han</i> <sup>3369</sup> / y; teashirt-Gal80 / UAS-Pdfr-16; R23E05-Gal4 / + | 52 (2pm), 60 (2am)                                 | 2am: R23E05 rescue vs DN1a rescue: p=0.8009. Mutant vs R23E05 rescue: p=0.9999. Mutant vs DN1a rescue: p=0.7312.                                                                                                                                        |
| Fig. 2f             | DN1a > GFP                                      | w <sup>-</sup> ; teashirt-Gal80 / UAS-myr::GFP; R23E05-Gal4 / +               | Representative sample (2am), of at least ten flies |                                                                                                                                                                                                                                                         |
| Fig. 2g, left       | DN1a > GFP with Clock antibody                  | w <sup>-</sup> ; teashirt-Gal80 / UAS-myr::GFP; R23E05-Gal4 / +               | Representative sample (2pm), of at least ten flies |                                                                                                                                                                                                                                                         |
| Fig. 2g, right      | DN1a > GFP with Period antibody                 | w <sup>-</sup> ; teashirt-Gal80 / UAS-myr::GFP; R23E05-Gal4 / +               | Representative sample (9am), of at least ten flies |                                                                                                                                                                                                                                                         |
| Fig. 2h, black      | UAS-GtACR1                                      | w <sup>+</sup> ; +/+; UAS-GtACR1::eYFP / +                                    | 87 (2pm), 95 (2am)                                 | Two-way ANOVA F(2,540)=100.4, interaction p = 0.0002, with Tukey's multiple comparisons test.                                                                                                                                                           |
| Fig. 2h, grey       | DN1a > GFP                                      | w <sup>-</sup> ; teashirt-Gal80 / UAS-myr::GFP; R23E05-Gal4 / +               | 64 (2pm), 103 (2am)                                |                                                                                                                                                                                                                                                         |
| Fig. 2h, green      | DN1a > GtACR1                                   | w <sup>-</sup> ; teashirt-Gal80/+; R23E05-Gal4/UAS-GtACR1::eYFP               | 85 (2pm), 112 (2am)                                | 2pm: UAS-control vs GFP control: p=0.6804. UAS control vs experimental: p>0.9999. GFP control vs experimental: p=0.6590.<br><br>2am: UAS-control vs GFP control: p>0.9999. UAS control vs experimental: p=0.0003. GFP control vs experimental p=0.0001. |
| Fig. 2i, black      | UAS-t-PDF                                       | w <sup>+</sup> ; +/+; 10x UAS-tethered-PDF                                    | 62 (2pm), 88 (2am)                                 | Two-way ANOVA F(2,331)=7.990, interaction                                                                                                                                                                                                               |

|                 |                                                  |                                                                                                          |                                                    |                                                                                                                                                                                                                                                         |
|-----------------|--------------------------------------------------|----------------------------------------------------------------------------------------------------------|----------------------------------------------------|---------------------------------------------------------------------------------------------------------------------------------------------------------------------------------------------------------------------------------------------------------|
| Fig. 2i, grey   | DN1a > GFP                                       | w <sup>-</sup> ; teashirt-Gal80 / UAS-myr::GFP; R23E05-Gal4/+                                            | 41 (2pm), 43 (2am)                                 | p=0.0004, with Tukey's multiple comparisons test.                                                                                                                                                                                                       |
| Fig. 2i, green  | DN1a > t-PDF                                     | w <sup>-</sup> ; teashirt-Gal80 / +; R23E05-Gal4 / 10x UAS tethered-PDF                                  | 48 (2pm), 55 (2am)                                 | 2pm: UAS-control vs GFP control: p=0.0111. UAS control vs experimental: p=0.2058. GFP control vs experimental p=0.8725.<br><br>2am: UAS-control vs GFP control: p=0.9846. UAS control vs experimental: p<0.0001. GFP control vs experimental: p=0.0001. |
| <b>Figure 3</b> |                                                  |                                                                                                          |                                                    |                                                                                                                                                                                                                                                         |
| Fig. 3a         | LNv > GFP; DN1a > GFP                            | w <sup>-</sup> ; teashirt-Gal80, PDF-LexA LexAop-myr::TdTomato; R23E05-Gal4/UAS-myr::GFP                 | Representative sample (2am), of at least ten flies |                                                                                                                                                                                                                                                         |
| Fig. 3b, left   | LNv > Denmark; R23E05 > syt::GFP                 | w <sup>-</sup> ; Pdf-Gal4 / UAS-DenMark; R23E05-LexA / LexAop-syt::GDP::HA                               | Representative sample (2am), of at least ten flies |                                                                                                                                                                                                                                                         |
| Fig. 3b, right  | R23E05 > Denmark; LNv > syt::GFP                 | w <sup>-</sup> ; PDF-LexA / UAS-DenMark; R23E05-Gal4 / LexAop-syt::GDP::HA                               | Representative sample (2pm), of at least ten flies |                                                                                                                                                                                                                                                         |
| Fig. 3c, left   | LNv > GFP, <i>trans</i> -Tango                   | w <sup>-</sup> ; UAS-myr::GFP.QUAS-mtdTomato-3xHA; Pdf-Gal4 / <i>trans</i> -Tango; Pdf-Gal4/+            | Representative sample of at least ten flies        |                                                                                                                                                                                                                                                         |
| Fig. 3c, right  | DN1a > GFP, <i>trans</i> -Tango                  | w <sup>-</sup> ; UAS-myr::GFP.QUAS-mtdTomato-3xHA; teashirt-Gal80 / <i>trans</i> -Tango; R23E05-Gal4 / + | Representative sample of at least ten flies        |                                                                                                                                                                                                                                                         |
| Fig. 3d, grey   | LNv > P2X <sub>2</sub> ; R23E05 > GCaMP (saline) | w <sup>-</sup> ; PDF-LexA / UAS-op-GCaMP6s; R23E05-Gal4 / LexAop-P2X <sub>2</sub>                        | 13 (2am)                                           | 2am Minimum: One-way ANOVA F(2,34)=9.721, p=0.0005, with Tukey's multiple comparisons test.                                                                                                                                                             |
| Fig. 3d, black  | LNv >                                            | w <sup>-</sup> ; PDF-LexA / UAS-op-                                                                      | 12 (2am)                                           |                                                                                                                                                                                                                                                         |

|                                    |                                                  |                                                                                   |                                                         |                                                                                                                                                                                            |
|------------------------------------|--------------------------------------------------|-----------------------------------------------------------------------------------|---------------------------------------------------------|--------------------------------------------------------------------------------------------------------------------------------------------------------------------------------------------|
|                                    | R23E05 > GCaMP                                   | GCaMP6s; R23E05-Gal4 / +                                                          |                                                         | 2am minimum: No P2X <sub>2</sub> control vs saline control: p=0.9903. No P2X <sub>2</sub> control vs experimental: p=0.0020. Saline control vs experimental p=0.0011.                      |
| Fig. 3d, green                     | LNv > P2X <sub>2</sub> ; R23E05 > GCaMP          | w <sup>-</sup> ; PDF-LexA / UAS-op-GCaMP6s; R23E05-Gal4 / LexAop-P2X <sub>2</sub> | 12 (2am)                                                | 2am Maximum: One-way ANOVA F(2,34)=0.1978, p=0.8214, with no multiple comparisons.                                                                                                         |
| Fig. 3e, grey                      | R23E05 > P2X <sub>2</sub> ; LNv > GCaMP (saline) | w <sup>-</sup> ; Pdf-Gal4 / UAS-op-GCaMP6s; R23E05-LexA / LexAop-P2X <sub>2</sub> | 13 (2pm)                                                | 2pm Minimum: One-way ANOVA F(2,38)=6.646, p=0.0033, with Tukey' s multiple comparisons test.                                                                                               |
| Fig. 3e, black                     | R23E05 > LNv > GCaMP                             | w <sup>-</sup> ; Pdf-Gal4 / UAS-op-GCaMP6s; R23E05-LexA / +                       | 13 (2pm)                                                | 2pm minimum: No P2X <sub>2</sub> control vs saline control: p=0.8549. No P2X <sub>2</sub> control vs experimental: p=0.0050. saline control vs experimental p=0.0175.                      |
| Fig. 3e, blue                      | R23E05 > P2X <sub>2</sub> ; LNv > GCaMP          | w <sup>-</sup> ; Pdf-Gal4 / UAS-op-GCaMP6s; R23E05-LexA / LexAop-P2X <sub>2</sub> | 14 (2pm)                                                | 2pm Maximum: One-way ANOVA F(2,38)=2.345, p=0.1095, with no multiple comparisons.                                                                                                          |
| <b>Figure 4</b>                    |                                                  |                                                                                   |                                                         |                                                                                                                                                                                            |
| Fig. 4a, left panel, top images    | LNv > GFP                                        | w <sup>-</sup> ; Pdf-Gal4 / + ; UAS-myr::GFP / +                                  | Representative samples (2pm, 2am) of at least ten flies |                                                                                                                                                                                            |
| Fig. 4a, left panel, bottom images | DN1a > GFP                                       | w <sup>-</sup> ; teashirt-Gal80 / UAS-myr::GFP; R23E05-Gal4 / +                   | Representative samples (2pm, 2am) of at least ten flies |                                                                                                                                                                                            |
| Fig. 4a, middle panel              |                                                  | w <sup>-</sup> ; Pdf-Gal4 / + ; UAS-myr::GFP / +                                  | 40 hemispheres (2pm), 34 hemispheres (2am)              | Unpaired t test t(72)=4.200, p<0.0001.                                                                                                                                                     |
| Fig. 4a, right panel               |                                                  | w <sup>-</sup> ; teashirt-Gal80 / UAS-myr::GFP; R23E05-Gal4 / +                   | 133 hemispheres (2pm), 174 hemispheres (2am).           | Two-way ANOVA F(1,610)=9.709, interaction p=0.0019, with Tukey' s multiple comparisons test.<br><br>2pm VL tract vs 2am VL tract: p<0.0001.<br><br>2pm VM tract vs 2am VM tract: p=0.9930. |

|                                    |                                         |                                                                                   |                                                         |                                                                                                                                                                                          |
|------------------------------------|-----------------------------------------|-----------------------------------------------------------------------------------|---------------------------------------------------------|------------------------------------------------------------------------------------------------------------------------------------------------------------------------------------------|
| Fig. 4b, left panel, top images    | LNV > myr::GFP; brp::Cherry             | w <sup>-</sup> ; Pdf-Gal4 / UAS-myr::GFP; Pdf-Gal4/UAS-brp-D3::mCherry            | Representative samples (2pm, 2am) of at least ten flies |                                                                                                                                                                                          |
| Fig. 4b, left panel, bottom images | DN1a > myr::GFP; brp::Cherry            | w <sup>-</sup> ; teashirt-Gal80 / UAS-myr::GFP; R23E05-Gal4 / UAS-brp-D3::mCherry | Representative samples (2pm, 2am) of at least ten flies |                                                                                                                                                                                          |
| Fig. 4b, middle panel              |                                         | w <sup>-</sup> ; Pdf-Gal4 / UAS-myr::GFP; Pdf-Gal4 / UAS-brp-D3::mCherry          | 10 hemispheres (2pm), 20 hemispheres (2am)              | Unpaired t test t(28)=5.254, p<0.0001.                                                                                                                                                   |
| Fig. 4b, right panel               |                                         | w <sup>-</sup> ; teashirt-Gal80 / UAS-myr::GFP; R23E05-Gal4 / UAS-brp-D3::mCherry | 18 hemispheres (2pm), 18 hemispheres (2am)              | Two-way ANOVA F(1,62)=6.417, interaction p=0.0138, with Tukey's multiple comparisons test.<br><br>2pm VL tract vs 2am VL tract: p=0.0395.<br><br>2pm VM tract vs 2am VM tract: p=0.8316. |
| Fig. 4c, top images                | <i>per</i> <sup>01</sup> ; LNV > GFP    | <i>per</i> <sup>01</sup> ; Pdf-Gal4 / +; Pdf-Gal4 / UAS-myr::GFP                  | Representative samples (2pm, 2am) of at least ten flies |                                                                                                                                                                                          |
| Fig. 4c, bottom images             | <i>per</i> <sup>01</sup> ; R23E05 > GFP | <i>per</i> <sup>01</sup> ; teashirt-Gal80 / +; R23E05-Gal4 / UAS-myr::GFP         | Representative samples (2pm, 2am) of at least ten flies |                                                                                                                                                                                          |
| Fig. 4c, middle panel              |                                         | <i>per</i> <sup>01</sup> ; Pdf-Gal4 / +; Pdf-Gal4 / UAS-myr::GFP                  | 37 hemispheres (2pm), 30 hemispheres (2am)              | Unpaired t test t(67)=1.822, p=0.0730.                                                                                                                                                   |
| Fig. 4c, right panel               |                                         | <i>per</i> <sup>01</sup> ; teashirt-Gal80 / +; R23E05-Gal4 / UAS-myr::GFP         | 59 hemispheres (2pm), 43 hemispheres (2am)              | Two-way ANOVA F(1,200)=1.619, interaction p=0.2048, with no multiple comparisons.                                                                                                        |
| Fig. 4d, top row                   | LNV > GFP                               | w <sup>-</sup> ; Pdf-Gal4 / +; UAS-myr::GFP / +                                   | Representative samples (2pm, 2am) of at least ten flies |                                                                                                                                                                                          |
| Fig. 4d, bottom left image         | LNV > GFP, Rho1                         | w <sup>-</sup> ; Pdf-Gal4 / +; UAS-myr::GFP / UAS-Rho1.Sph                        | Representative samples (2pm) of at least ten flies      |                                                                                                                                                                                          |

|                                             |                         |                                                                       |                                                    |                                                                                                                       |
|---------------------------------------------|-------------------------|-----------------------------------------------------------------------|----------------------------------------------------|-----------------------------------------------------------------------------------------------------------------------|
| Fig. 4d, bottom right image                 | LNv > GFP, Rho1-RNAi    | w <sup>-</sup> ; Pdf-Gal4 / UAS-Rho1-dsRNA; UAS-myr::GFP / UAS-Dicer2 | Representative samples (2am) of at least ten flies |                                                                                                                       |
| Fig. 4d, blue circles                       |                         | w <sup>-</sup> ; Pdf-Gal4 / +; UAS-myr::GFP / +                       | 67 hemispheres (2pm), 34 hemispheres (2am)         | One-way ANOVA F(3,165)=8.681, p<0.0001, with Tukey's multiple comparisons test.                                       |
| Fig. 4d, blue upward triangle (Rho1 OE)     |                         | w <sup>-</sup> ; Pdf-Gal4 / +; UAS-myr::GFP / UAS-Rho1.Sph            | 45 hemispheres (2pm)                               | 2pm control vs 2am control: p=0.0048. 2pm control vs LNv>Rho1: p=0.0019. 2am control vs 2am LNv>Rho1-RNAi: p=0.0029.  |
| Fig. 4d, blue downward triangle (Rho1-RNAi) |                         | w <sup>-</sup> ; Pdf-Gal4 / UAS-Rho1-dsRNA; UAS-myr::GFP / UAS-Dicer2 | 22 hemispheres (2am)                               |                                                                                                                       |
| Fig. 4e, top row                            | R23E05 > GFP            | w <sup>-</sup> ; UAS-myr::GFP / +; R23E05-Gal4 / +                    | Representative samples (2pm) of at least ten flies |                                                                                                                       |
| Fig. 4e, bottom left image                  | R23E05 > GFP, Rho1-RNAi | w <sup>-</sup> ; UAS-myr::GFP / UAS-Rho1-dsRNA; R23E05-Gal4 / +       | Representative samples (2pm) of at least ten flies |                                                                                                                       |
| Fig. 4d, bottom right image                 | R23E05 > GFP, Rho1      | w <sup>-</sup> ; UAS-myr::GFP / +; R23E05-Gal4 / UAS-Rho1.Sph         | Representative samples (2am) of at least ten flies |                                                                                                                       |
| Fig. 4e, green circles                      |                         | w <sup>-</sup> ; UAS-myr::GFP / +; R23E05-Gal4 / +                    | 33 hemispheres (2pm), 37 hemispheres (2am)         | One-way ANOVA F(7,280)=12.98, p<0.0001, with Tukey's multiple comparisons test.                                       |
| Fig. 4e, downward triangle (Rho1-RNAi)      |                         | w <sup>-</sup> ; UAS-myr::GFP / UAS-Rho1-dsRNA; R23E05-Gal4 / +       | 32 hemispheres (2pm)                               | VL: 2pm control vs 2am control: p=0.0160. 2pm control vs DN1a>Rho1: p=0.0002. 2am control vs 2am DN1a>Rho1: p<0.0001. |
| Fig. 4e, upward triangle (Rho1 OE)          |                         | w <sup>-</sup> ; UAS-myr::GFP / +; R23E05-Gal4 / UAS-Rho1.Sph         | 40 hemispheres (2am)                               | VM: 2pm control vs 2am control: p>0.9999. 2pm control vs DN1a>Rho1: p>0.9999. 2am control vs                          |

|                             |                    |                                                                 |                                                                         |                                                                                                                                                                                                                                                                                                                                                                                                                                                                                     |
|-----------------------------|--------------------|-----------------------------------------------------------------|-------------------------------------------------------------------------|-------------------------------------------------------------------------------------------------------------------------------------------------------------------------------------------------------------------------------------------------------------------------------------------------------------------------------------------------------------------------------------------------------------------------------------------------------------------------------------|
|                             |                    |                                                                 |                                                                         | 2am DN1a>Rho1:<br>p>0.9999.                                                                                                                                                                                                                                                                                                                                                                                                                                                         |
| Fig. 4f, black              | UAS-Rho1           | w <sup>+</sup> ; +/+; UAS-Rho1.Sph / +                          | 71 (2pm), 2am (68)                                                      | Two-way ANOVA F(3,546)=10.25, interaction p<0.0001, with Tukey's multiple comparisons test.                                                                                                                                                                                                                                                                                                                                                                                         |
| Fig. 4f, grey (2pm)         | GFP Control, left  | w <sup>-</sup> ; Pdf-Gal4 / UAS-myr::GFP; Pdf-Gal4 / +          | 57                                                                      |                                                                                                                                                                                                                                                                                                                                                                                                                                                                                     |
| Fig. 4f, grey (2am)         | GFP Control, right | w <sup>-</sup> ; teashirt-Gal80 / UAS-myr::GFP; R23E05-Gal4/+   | 73                                                                      | 2pm: UAS-control vs LNv>GFP control: p=0.8420. UAS control vs LNv>Rho1: p=0.001. UAS control vs DN1a>Rho1: p>0.9999. LNv>GFP control vs LNv>Rho1: p<0.0001. LNv>GFP control vs DN1a>Rho1: p=0.7598. LNv>Rho1 vs DN1a>Rho1: p=0.0006.<br><br>2am: UAS-control vs DN1a>GFP control: p=0.3743. UAS control vs LNv>Rho1: p=0.9269. UAS control vs DN1a>Rho1: p=0.0094. LNv>GFP control vs LNv>Rho1: p=0.9981. DN1a>GFP control vs DN1a>Rho1: p<0.0001. LNv>Rho1 vs DN1a>Rho1: p=0.0005. |
| Fig. 4f, blue               | Rho1 OE in LNvs    | w <sup>-</sup> ; Pdf-Gal4 / + ; Pdf-Gal4 / UAS-Rho1.Sph         | 97 (2pm), 42 (2am)                                                      |                                                                                                                                                                                                                                                                                                                                                                                                                                                                                     |
| Fig. 4f, green              | Rho1 OE in DN1as   | w <sup>-</sup> ; teashirt-Gal80 / +; R23E05-Gal4 / UAS-Rho1.Sph | 64 (2pm), 82 (2am)                                                      |                                                                                                                                                                                                                                                                                                                                                                                                                                                                                     |
| <b>Extended Data</b>        |                    |                                                                 |                                                                         |                                                                                                                                                                                                                                                                                                                                                                                                                                                                                     |
| Extended Data Fig. 1a,b     |                    | w <sup>+</sup> , iso31                                          | 62 (2pm), 63 (2am). Same flies as 1a and B.                             | One-way ANOVA F(3,496)=77.85, p<0.0001, with Tukey's multiple comparisons test.<br><br>LD Day vs DD day: p<0.0001. DD Day vs DD night: p<0.0353.                                                                                                                                                                                                                                                                                                                                    |
| Extended Data Fig. 1c       |                    | w <sup>+</sup> , iso31                                          | 33 (2pm), 58 (2am). Subsample of sleeping flies from Figure 1, A and B. |                                                                                                                                                                                                                                                                                                                                                                                                                                                                                     |
| Extended Data Fig. 1d, left |                    | w <sup>+</sup> , iso31                                          | 62 (2pm), 63 (2am). Same flies as Figure 1, A and B                     |                                                                                                                                                                                                                                                                                                                                                                                                                                                                                     |

|                                          |                   |                                                                                            |                                                    |                                         |
|------------------------------------------|-------------------|--------------------------------------------------------------------------------------------|----------------------------------------------------|-----------------------------------------|
| Extended Data Fig. 1d, right             |                   | <i>w<sup>+</sup>, iso31</i>                                                                | Requantification of flies from Figure 1d.          |                                         |
| Extended Data Fig. 2a,b                  | Wild-type females | <i>w<sup>+</sup>, iso31</i>                                                                | 31 (2pm), 35 (2am)                                 | Unpaired t test t(64)=8.248, p=<0.0001. |
| Extended Data Fig. 3b,c                  |                   | <i>w<sup>+</sup>, iso31</i>                                                                | 32                                                 |                                         |
| Extended Data Fig. 3d,e                  |                   | <i>w<sup>+</sup>, iso31</i>                                                                | 26                                                 |                                         |
| Extended Data Fig. 3f, 6L:18D            |                   | <i>w<sup>+</sup>, iso31</i>                                                                | 32, same flies as 3d,e                             | Unpaired t test t(56)=7.359, p=<0.0001. |
| Extended Data Fig. 3f, 16L:8D            |                   | <i>w<sup>+</sup>, iso31</i>                                                                | 26, same flies as 3f,g                             |                                         |
| Extended Data Fig. 3g,h                  |                   | <i>w<sup>+</sup>, iso31</i>                                                                | 30 (2pm)                                           |                                         |
| Extended Data Fig. 4a,b left             | UAS-Clock-RNAi    | <i>w<sup>+</sup></i> ; UAS-Clock-RNAi/+; UAS-Dicer2 / +                                    | 32                                                 |                                         |
| Extended Data Fig. 4a,b middle           | Tim > GFP         | <i>w<sup>-</sup></i> ; Tim(UAS)-Gal4, Repo-Gal80 / UAS-myr::GFP; UAS-Dicer2 / +            | 33                                                 |                                         |
| Extended Data Fig. 4a,b right            | Tim > Clock-RNAi  | <i>w<sup>-</sup></i> ; Tim(UAS)-Gal4, Repo-Gal80 / UAS-Clock-RNAi; UAS-Dicer2 / UAS-Dicer2 | 35                                                 |                                         |
| Extended Data Fig. 4c, left image        | UAS-Clock-RNAi    | <i>w<sup>+</sup></i> ; UAS-Clock-RNAi / +; UAS-Dicer2 / +                                  | Representative samples (ZT6) of at least ten flies |                                         |
| Extended Data Fig. 4c, middle image      | Tim > Clock-RNAi  | <i>w<sup>-</sup></i> ; Tim(UAS)-Gal4, Repo-Gal80 / UAS-Clock-RNAi; UAS-Dicer2 / UAS-Dicer2 | Representative samples (ZT6) of at least ten flies |                                         |
| Extended Data Fig. 4c, right panel, grey |                   | <i>w<sup>+</sup></i> ; UAS-Clock-RNAi / +; UAS-Dicer2 / +                                  | 11                                                 | Unpaired t test t(18)=6.464, p=<0.0001. |
| Extended Data Fig. 4c, right panel, red  |                   | <i>w<sup>-</sup></i> ; Tim(UAS)-Gal4, Repo-Gal80 / UAS-Clock-RNAi;                         | 9                                                  |                                         |

|                                            |                                        |                                                                                       |                                                             |                                                                                                                                                                                                                              |
|--------------------------------------------|----------------------------------------|---------------------------------------------------------------------------------------|-------------------------------------------------------------|------------------------------------------------------------------------------------------------------------------------------------------------------------------------------------------------------------------------------|
|                                            |                                        | UAS-Dicer2 / UAS-Dicer2                                                               |                                                             |                                                                                                                                                                                                                              |
| Extended Data Fig. 4d, left image          | UAS-Period-RNAi                        | w <sup>+</sup> ; UAS-Dicer2 / +; UAS-Period-RNAi / +                                  | Representative samples (ZT1) of at least ten flies          |                                                                                                                                                                                                                              |
| Extended Data Fig. 4d, middle image        | Tim > Period-RNAi                      | w <sup>-</sup> ; Tim(UAS)-Gal4, Repo-Gal80 / UAS-Dicer2; UAS-Period-RNAi / UAS-Dicer2 | Representative samples (ZT1) of at least ten flies          | Unpaired t test t(21)=10.91, p=<0.0001.                                                                                                                                                                                      |
| Extended Data Fig. 4d, right panel, grey   |                                        | w <sup>+</sup> ; UAS-Dicer2 / +; UAS-Period-RNAi / +                                  | 11                                                          |                                                                                                                                                                                                                              |
| Extended Data Fig. 4d, right panel, purple |                                        | w <sup>-</sup> ; Tim(UAS)-Gal4, Repo-Gal80 / UAS-Dicer2; UAS-Period-RNAi / UAS-Dicer2 | 12                                                          |                                                                                                                                                                                                                              |
| Extended Data Fig. 5a, top                 | Wild-type                              | w <sup>+</sup> , <i>iso31</i>                                                         | 46                                                          |                                                                                                                                                                                                                              |
| Extended Data Fig. 5a, bottom              | w <sup>+</sup> <i>per</i> <sup>S</sup> | w <sup>+</sup> <i>per</i> <sup>S</sup>                                                | 15                                                          |                                                                                                                                                                                                                              |
| Extended Data Fig. 5b, grey                | Wild-type                              | w <sup>+</sup> , <i>iso31</i>                                                         | Same control flies as Figure 1d.                            |                                                                                                                                                                                                                              |
| Extended Data Fig. 5b, red                 | w <sup>+</sup> <i>per</i> <sup>S</sup> | w <sup>+</sup> <i>per</i> <sup>S</sup>                                                | 9am (16), 14 (1pm), 16 (5pm), 13 (8pm), 13 (9pm), 14 (11pm) |                                                                                                                                                                                                                              |
| Extended Data Fig. 6a                      |                                        | w <sup>+</sup> , <i>iso31</i>                                                         | Representative sample (2pm), of at least ten flies          |                                                                                                                                                                                                                              |
| Extended Data Fig. 6b, black               | UAS-PDF-RNAi                           | w <sup>-</sup> ; UAS-Dicer2; UAS-PDF-RNAi                                             | 52 (2pm), 49 (2am)                                          | Two-way ANOVA F(2,325)=33.52, interaction p<0.0001, with Tukey's multiple comparisons test.<br><br>2pm: UAS-control vs Gal4 control: p=0.4789. UAS control vs experimental: p<0.0001. Gal4 control vs experimental p<0.0001. |



|                                   |                            |                                                                                                   |                                              |                                                                                                                                                                                                                                                                                                                                          |
|-----------------------------------|----------------------------|---------------------------------------------------------------------------------------------------|----------------------------------------------|------------------------------------------------------------------------------------------------------------------------------------------------------------------------------------------------------------------------------------------------------------------------------------------------------------------------------------------|
|                                   |                            |                                                                                                   |                                              | 2am: UAS-control vs Gal4 control: p<0.0001. UAS control vs experimental: p=0.8602. Gal4 control vs experimental: p=0.0051.                                                                                                                                                                                                               |
| Extended Data Fig. 6b, grey       | LNv-Gal4                   | UAS-Dicer2 / y; Pdf-Gal4 / +; Pdf-Gal4 / +                                                        | 43 (2pm), 68 (2am)                           |                                                                                                                                                                                                                                                                                                                                          |
| Extended Data Fig. 6b, blue       | LNv > PDF-RNAi             | UAS-Dicer2 / y; Pdf-Gal4 / UAS-Dicer2; Pdf-Gal4 / PDF-RNAi                                        | 59 (2pm), 60 (2am)                           |                                                                                                                                                                                                                                                                                                                                          |
| Extended Data Fig. 6c, black      | <i>w</i> <sup>1118</sup>   | <i>w</i> <sup>1118</sup>                                                                          | 72 (2pm), 74 (2am)                           | Two-way ANOVA F(2,404)=35.99, interaction p<0.0001, with Tukey's multiple comparisons test.                                                                                                                                                                                                                                              |
| Extended Data Fig. 6c, blue       | <i>han</i> <sup>3369</sup> | <i>han</i> <sup>3369</sup>                                                                        | 63 (2pm), 71 (2am)                           | 2pm: <i>han</i> <sup>3369</sup> mutant vs <i>han</i> <sup>5304</sup> mutant p=0.0228.                                                                                                                                                                                                                                                    |
| Extended Data Fig. 6c, purple     | <i>han</i> <sup>5304</sup> | <i>han</i> <sup>5304</sup>                                                                        | 65 (2pm), 65 (2am)                           | WT control vs <i>han</i> <sup>3369</sup> mutant: p=0.0020. WT control vs <i>han</i> <sup>5304</sup> mutant: p<0.0001.<br><br>2am: <i>han</i> <sup>3369</sup> mutant vs <i>han</i> <sup>5304</sup> mutant p=0.0228. WT control vs <i>han</i> <sup>3369</sup> mutant: p<0.0001. WT control vs <i>han</i> <sup>5304</sup> mutant: p=0.0056. |
| Extended Data Fig. 7a, orange     | Small LNv (681) > GFP      | <i>w</i> ; JRC_SS00681 split-Gal4 hemidriver / +; JRC_SS00681 split-Gal4 hemidriver; UAS-myr::GFP | Representative sample of at least five flies |                                                                                                                                                                                                                                                                                                                                          |
| Extended Data Fig. 7a, purple     | Large LNv (645) > GFP      | <i>w</i> ; JRC_SS00645 split-Gal4 hemidriver / +; JRC_SS00645 split-Gal4 hemidriver; UAS-myr::GFP | Representative sample of at least five flies |                                                                                                                                                                                                                                                                                                                                          |
| Extended Data Fig. 7b, left panel | UAS-PDF-RNAi               | <i>w</i> ; UAS-Dicer2; UAS-PDF-RNAi                                                               | Representative sample of ten flies           |                                                                                                                                                                                                                                                                                                                                          |

|                                                     |                            |                                                                                                                  |                                          |  |
|-----------------------------------------------------|----------------------------|------------------------------------------------------------------------------------------------------------------|------------------------------------------|--|
| Extended Data Fig. 7b, middle panel                 | Small LNV (681) > PDF-RNAi | w <sup>-</sup> ; JRC_SS00681 split-Gal4 hemidriver / UAS-Dicer2; JRC_SS00681 split-Gal4 hemidriver; UAS-PDF-RNAi | Representative sample of ten flies       |  |
| Extended Data Fig. 7b, right panel                  | Large LNV (645) > PDF-RNAi | w <sup>-</sup> ; JRC_SS00645 split-Gal4 hemidriver / UAS-Dicer2; JRC_SS00645 split-Gal4 hemidriver; UAS-PDF-RNAi | Representative sample of ten flies       |  |
| Extended Data Fig. 7c, left and right panels, black | UAS-PDF-RNAi               | w <sup>-</sup> ; UAS-Dicer2; UAS-PDF-RNAi                                                                        | 30 (same flies in left and right panels) |  |
| Extended Data Fig. 7c, left panel, grey             | Small LNV (681) > GFP      | w <sup>-</sup> ; JRC_SS00681 split-Gal4 hemidriver / +; JRC_SS00681 split-Gal4 hemidriver; UAS-myr::GFP          | 66                                       |  |
| Extended Data Fig. 7c, left panel, orange           | Small LNV (681) > PDF-RNAi | w <sup>-</sup> ; JRC_SS00681 split-Gal4 hemidriver / UAS-Dicer2; JRC_SS00681 split-Gal4 hemidriver; UAS-PDF-RNAi | 45                                       |  |
| Extended Data Fig. 7c, right panel, grey            | Large LNV (645) > GFP      | w <sup>-</sup> ; JRC_SS00645 split-Gal4 hemidriver / +; JRC_SS00645 split-Gal4 hemidriver; UAS-myr::GFP          | 46                                       |  |
| Extended Data Fig. 7c, right panel, purple          | Large LNV (645) > PDF-RNAi | w <sup>-</sup> ; JRC_SS00645 split-Gal4 hemidriver / UAS-Dicer2; JRC_SS00645 split-Gal4                          | 44                                       |  |

|                                             |                        |                                                                                                                  |                                              |                                                                                                                                                                                                                                                                                                                                                                                                     |
|---------------------------------------------|------------------------|------------------------------------------------------------------------------------------------------------------|----------------------------------------------|-----------------------------------------------------------------------------------------------------------------------------------------------------------------------------------------------------------------------------------------------------------------------------------------------------------------------------------------------------------------------------------------------------|
|                                             |                        | hemidriver; UAS-PDF-RNAi                                                                                         |                                              |                                                                                                                                                                                                                                                                                                                                                                                                     |
| Extended Data Fig. 7d, black                |                        | w <sup>-</sup> ; UAS-Dicer2; UAS-PDF-RNAi                                                                        | 10 (quantification of Extended Data Fig. 7b) | ZT6: Two-way ANOVA F(2,55)=59.78, interaction p<0.0001, with Tukey's multiple comparisons test.<br><br>Small LNv axons: UAS control vs ILNv>PDF-RNAi: p=0.9995. UAS control vs sLNv>PDF-RNAi: p<0.0001. sLNv>PDF-RNAi vs ILNv-PDF-RNAi: p<0.0001.<br><br>large LNv axons: UAS control vs ILNv>PDF-RNAi: p<0.0001. UAS control vs sLNv>PDF-RNAi: p=0.3529. sLNv>PDF-RNAi vs ILNv-PDF-RNAi: p<0.0001. |
| Extended Data Fig. 7d, orange               |                        | w <sup>-</sup> ; JRC_SS00681 split-Gal4 hemidriver / UAS-Dicer2; JRC_SS00681 split-Gal4 hemidriver; UAS-PDF-RNAi | 10 (quantification of Extended Data Fig. 7b) |                                                                                                                                                                                                                                                                                                                                                                                                     |
| Extended Data Fig. 7d, purple               |                        | w <sup>-</sup> ; JRC_SS00645 split-Gal4 hemidriver / UAS-Dicer2; JRC_SS00645 split-Gal4 hemidriver; UAS-PDF-RNAi | 10 (quantification of Extended Data Fig. 7b) |                                                                                                                                                                                                                                                                                                                                                                                                     |
| Extended Data Fig. 7e, first column (black) | UAS-PDF-RNAi           | w <sup>-</sup> ; UAS-Dicer2; UAS-PDF-RNAi                                                                        | 30 (quantification of Extended Data Fig. 7c) | One-Way ANOVA F(7,334)=14.56, with Tukey's multiple comparisons test. 2pm: UAS control vs 681>PDF-RNAi: p<0.0001.                                                                                                                                                                                                                                                                                   |
| Extended Data Fig. 7e, second column (Grey) | GFP control (645-Gal4) | w <sup>-</sup> ; JRC_SS00645 split-Gal4 hemidriver / +; JRC_SS00645 split-Gal4 hemidriver; UAS-myr::GFP          | 46 (quantification of Extended Data Fig. 7c) | UAS control vs R6>PDF-RNAi: p=0.0463. UAS control vs 645>PDF-RNAi: p=0.9186. UAS control vs C929>PDF-RNAi: p=0.1092. UAS control vs                                                                                                                                                                                                                                                                 |

|                                               |                                  |                                                                                                                  |                                              |                                                                                                                                                                                                                                                                                                                                                                                                                                                                       |
|-----------------------------------------------|----------------------------------|------------------------------------------------------------------------------------------------------------------|----------------------------------------------|-----------------------------------------------------------------------------------------------------------------------------------------------------------------------------------------------------------------------------------------------------------------------------------------------------------------------------------------------------------------------------------------------------------------------------------------------------------------------|
| Extended Data Fig. 7e, third column (purple)  | Large LNV > PDF-RNAi (645-Gal4)  | w <sup>-</sup> ; JRC_SS00645 split-Gal4 hemidriver / UAS-Dicer2; JRC_SS00645 split-Gal4 hemidriver; UAS-PDF-RNAi | 44 (quantification of Extended Data Fig. 7c) | 645>GFP p=0.0226. UAS control vs 681>PDF-RNAi: p=0.1901. UAS control vs R6>GFP: p>0.9999. 645>GFP vs 645>PDF-RNAi: p=0.9282. 645>PDF-RNAi vs C929>PDF-RNAi: p=0.7739. 645>PDF-RNAi vs 681>PDF-RNAi: p<0.0001. 645>PDF-RNAi vs R6>PDF-RNAi: p=0.0095. C929>PDF-RNAi vs R6>PDF-RNAi: p=0.0002. 681>GFP vs 681>PDF-RNAi: p<0.0001. 681>GFP vs R6>PDF-RNAi: p=0.0002. 681>GFP vs R6>GFP: p=0.0002. 681>PDF-RNAi vs R6>PDF-RNAi: p=0.9999. R6>Myr vs R6>PDF-RNAi p=0.0875. |
| Extended Data Fig. 7e, fourth column (purple) | Large LNV > PDF-RNAi (C929-Gal4) | w <sup>-</sup> ; C929-Gal4 / UAS-Dicer2; UAS-PDF-RNAi / +                                                        | 15                                           | One-Way ANOVA F(7,334)=14.56, with Tukey's multiple comparisons test. 2pm: UAS control vs 681>PDF-RNAi: p<0.0001.                                                                                                                                                                                                                                                                                                                                                     |
| Extended Data Fig. 7e, fifth column (grey)    | GFP control (R6-Gal4)            | UAS-Dicer2 / y; R6-Gal4/UAS-myr::GFP; UAS-Dicer2 / +                                                             | 26                                           | UAS control vs R6>PDF-RNAi: p=0.0463. UAS control vs 645>PDF-RNAi: p=0.9186. UAS control vs C929>PDF-RNAi: p=0.1092.                                                                                                                                                                                                                                                                                                                                                  |
| Extended Data Fig. 7e, sixth column (orange)  | Small LNV > PDF-RNAi (R6-Gal4)   | UAS-Dicer2 / y; R6-Gal4/UAS-Dicer2; UAS-PDF-RNAi                                                                 | 14                                           | UAS control vs 645>GFP p=0.0226. UAS control vs 681>PDF-RNAi: p=0.1901. UAS control vs R6>GFP: p>0.9999.                                                                                                                                                                                                                                                                                                                                                              |
| Extended Data Fig. 7e, seventh column (grey)  | GFP control (681-Gal4)           | w <sup>-</sup> ; JRC_SS00681 split-Gal4 hemidriver / +; JRC_SS00681 split-Gal4 hemidriver; UAS-myr::GFP          | 66 (quantification of Extended Data Fig. 7c) | 645>GFP vs 645>PDF-RNAi: p=0.9282. 645>PDF-RNAi vs C929>PDF-RNAi: p=0.7739. 645>PDF-RNAi vs 681>PDF-RNAi: p<0.0001.                                                                                                                                                                                                                                                                                                                                                   |
| Extended Data Fig. 7e, eighth                 | Small LNV > PDF-                 | w <sup>-</sup> ; JRC_SS00681 split-Gal4 hemidriver / UAS-                                                        | 45 (quantification                           | 645>PDF-RNAi vs R6>PDF-RNAi: p=0.0095. C929>PDF-                                                                                                                                                                                                                                                                                                                                                                                                                      |

|                                   |                                                 |                                                                                       |                                              |                                                                                                                                                                                                                                                                                                                                             |
|-----------------------------------|-------------------------------------------------|---------------------------------------------------------------------------------------|----------------------------------------------|---------------------------------------------------------------------------------------------------------------------------------------------------------------------------------------------------------------------------------------------------------------------------------------------------------------------------------------------|
| column (orange)                   | RNAi (681-Gal4)                                 | Dicer2; JRC_SS00681 split-Gal4 hemidriver; UAS-PDF-RNAi                               | of Extended Data Fig. 7c)                    | RNAi vs R6>PDF-RNAi: p=0.0002. 681>GFP vs 681>PDF-RNAi: p<0.0001. 681>GFP vs R6>PDF-RNAi: p=0.0002. 681>GFP vs R6>GFP: p=0.0002. 681>PDF-RNAi vs R6>PDF-RNAi: p=0.9999. R6>Myr vs R6>PDF-RNAi p=0.0875.                                                                                                                                     |
| Extended Data Fig. 8b, blue       | <i>han</i> <sup>5304</sup> ; UAS-Pdfr           | <i>han</i> <sup>5304</sup> / y; UAS-Pdfr-16 / + ; Atp2 / +                            | 76 (2pm), 55 (2am)                           |                                                                                                                                                                                                                                                                                                                                             |
| Extended Data Fig. 8b, dark green | <i>han</i> <sup>5304</sup> ; R23E05-Gal4 > Pdfr | <i>han</i> <sup>5304</sup> / y; UAS-Pdfr-16 / + ; R23E05-Gal4 / +                     | 68 (2pm), 77 (2am)                           |                                                                                                                                                                                                                                                                                                                                             |
| Extended Data Fig. 8b, green      | <i>han</i> <sup>5304</sup> ; DN1a-Gal4 > Pdfr   | <i>han</i> <sup>5304</sup> / y; teashirt-Ga80/UAS-Pdfr-16; R23E05-Gal4 / +            | 68 (2pm), 45 (2am)                           | Two-way ANOVA F(2,383)=34.21, interaction p<0.0001, with Tukey's multiple comparisons test.<br><br>2pm: R23E05 rescue vs DN1a rescue: p<0.0001. Mutant vs R23E05 rescue: p<0.0001. Mutant vs DN1a rescue: p<0.0001.<br><br>2am: R23E05 rescue vs DN1a rescue: p=0.9898. Mutant vs R23E05 rescue: p=0.5132. Mutant vs DN1a rescue: p=0.9348. |
| Extended Data Fig. 9a             | R23E05 > RedStinger                             | w <sup>-</sup> ; UAS-RedStinger / +; R23E05-Gal4 / +                                  | Representative sample of at least ten flies  |                                                                                                                                                                                                                                                                                                                                             |
| Extended Data Fig. 9b             | R23E05-LexA > LexAop-Myr::GFP                   | w <sup>-</sup> ; +/+; R23E05-LexA / 13xLexAop2-IVS-Myr::GFP                           | Representative sample of at least five flies |                                                                                                                                                                                                                                                                                                                                             |
| Extended Data Fig. 9c             | DN1a > myr::GFP                                 | w <sup>-</sup> ; teashirt-Gal80 / UAS-myr::GFP; R23E05-Gal4/+                         | Representative sample of at least five flies |                                                                                                                                                                                                                                                                                                                                             |
| Extended Data Fig. 9d             | DN1a > Denmark, Syt::GFP                        | w <sup>-</sup> ; teashirt-Gal80 / repo-Gal80; UAS-Denmark, UAS-Syt::GP; R23E05-Gal4/+ | Representative sample of at least ten flies  |                                                                                                                                                                                                                                                                                                                                             |
| Extended Data Fig. 9e, top        | R23E05 > myr::GFP                               | w <sup>-</sup> ; UAS-myr::GFP / +; R23E05-Gal4 / +                                    | Representative sample of at least ten flies  |                                                                                                                                                                                                                                                                                                                                             |
| Extended Data Fig. 9e, bottom     | R23E05 > myr::GFP, tsh-Gal80                    | w <sup>-</sup> ; teashirt-Gal80 / UAS-myr::GFP; R23E05-Gal4/+                         | Representative sample of at least ten flies  |                                                                                                                                                                                                                                                                                                                                             |

|                                              |                     |                                                                           |                                             |                                                                                                                                                                                                                                                                                                                                                           |
|----------------------------------------------|---------------------|---------------------------------------------------------------------------|---------------------------------------------|-----------------------------------------------------------------------------------------------------------------------------------------------------------------------------------------------------------------------------------------------------------------------------------------------------------------------------------------------------------|
| Extended Data Fig. 10a                       | R23E05 > myr::GFP   | w <sup>-</sup> ; / UAS-myr::GFP; R23E05-Gal4 / +                          | Representative sample of at least ten flies |                                                                                                                                                                                                                                                                                                                                                           |
| Extended Data Fig. 10b, top, black           | UAS-CCHa1-RNAi      | w <sup>+</sup> ; UAS-CCHa1-RNAi / +; +/+                                  | 42 (2pm), 44 (2am)                          | Two-way ANOVA F(2,289)=6.517, interaction p=0.0017, with Tukey's multiple comparisons test.<br><br>2pm: UAS-control vs GFP control: p=0.0005. UAS control vs experimental: p=0.0384. GFP control vs experimental p<0.0001.<br><br>2am: UAS-control vs FP control: p=0.9599. UAS control vs experimental: p=0.2008. GFP control vs experimental: p=0.6900. |
| Extended Data Fig. 10b, top, grey            | R23E05 > GFP        | w <sup>-</sup> ; UAS-Dicer2 / UAS-myr::GFP; R23E05-Gal4 / +               | 55 (2pm), 48 (2am)                          |                                                                                                                                                                                                                                                                                                                                                           |
| Extended Data Fig. 10b, top, green           | R23E05 > CCHa1-RNAi | w <sup>-</sup> ; UAS-Dicer2 / UAS-CCHa1; R23E05-Gal4 / +                  | 51 (2pm), 55 (2am)                          |                                                                                                                                                                                                                                                                                                                                                           |
| Extended Data Fig. 10b, bottom, black        | UAS-CCHa1R-RNAi     | w <sup>+</sup> ; UAS-CCHa1R-RNAi / +; +/+                                 | 49 (2pm), 61 (2am)                          | Two-way ANOVA F(2,311)=0.4671, interaction p=0.6272, no multiple comparisons test.                                                                                                                                                                                                                                                                        |
| Extended Data Fig. 10b, bottom, grey         | LNv > GFP           | UAS-Dicer2 / y; Pdf-Gal4 / UAS-myr::GFP; Pdf-Gal4 / +                     | 58 (2pm), 63 (2am)                          |                                                                                                                                                                                                                                                                                                                                                           |
| Extended Data Fig. 10b, blue                 | LNv > CCHa1R-RNAi   | UAS-Dicer2 / y; Pdf-Gal4 / UAS-CCHa1R-RNAi; Pdf-Gal4 / +                  | 41 (2pm), 45 (2am)                          |                                                                                                                                                                                                                                                                                                                                                           |
| Extended Data Fig. 11a, first column (black) | UAS-Clock-RNAi      | w <sup>+</sup> ; UAS-Clock-RNAi/+; UAS-Dicer2 / +                         | 74 (2am, same flies as Figure 1g).          | One-way ANOVA F(8,739)=2.557, p=0.0094, with Tukey's post hoc test.<br><br>UAS-GtACR1 (from LNv experiments) vs: LNv>GFP, p=0.8765. LNv>GtACR1, p>0.9999.                                                                                                                                                                                                 |
| Extended Data Fig. 11a, second               | Tim > GFP           | w <sup>-</sup> ; Tim(UAS)-Gal4, Repo-Gal80 / UAS-myr::GFP; UAS-Dicer2 / + | 75 (2am, same flies as Figure 1g).          |                                                                                                                                                                                                                                                                                                                                                           |

|                                            |                  |                                                                         |                                    |                                                                                                                                                                                                                                                                                                                                                                                                                                                                                                                                                                                                                                                                                                                                                                                                                                                                                                                                                                                                                                                                                                                                                                                                                       |
|--------------------------------------------|------------------|-------------------------------------------------------------------------|------------------------------------|-----------------------------------------------------------------------------------------------------------------------------------------------------------------------------------------------------------------------------------------------------------------------------------------------------------------------------------------------------------------------------------------------------------------------------------------------------------------------------------------------------------------------------------------------------------------------------------------------------------------------------------------------------------------------------------------------------------------------------------------------------------------------------------------------------------------------------------------------------------------------------------------------------------------------------------------------------------------------------------------------------------------------------------------------------------------------------------------------------------------------------------------------------------------------------------------------------------------------|
| column<br>(grey)                           |                  |                                                                         |                                    | UAS-GtACR1 (from DN1a experiments), p=0.5163.                                                                                                                                                                                                                                                                                                                                                                                                                                                                                                                                                                                                                                                                                                                                                                                                                                                                                                                                                                                                                                                                                                                                                                         |
| Extended Data Fig. 11a, third column (red) | Tim > Clock-RNAi | w-; Tim(UAS)-Gal4, Repo-Gal80 / UAS-Clock-RNAi; UAS-Dicer2 / UAS-Dicer2 | 61 (2am, same flies as Figure 1g). | <p>DN1a&gt;GFP, p=0.9487.<br/> DN1a&gt;GtACR1, p&gt;0.9999.<br/> Tim&gt;Clk-RNAi, p=0.8894.<br/> UAS-Clk-RNAi, p&gt;0.9999.<br/> Tim&gt;GFP, p=0.9983.</p> <p>LNv&gt;GFP vs:<br/> LNv&gt;GtACR1, p=0.9431.<br/> UAS-GtACR1 (from DN1a experiments), p&gt;0.9999.<br/> DN1a&gt;GFP, p&gt;0.9999.<br/> DN1a&gt;GtACR1, p=0.7552.<br/> Tim&gt;Clk-RNAi, p=0.1099.<br/> UAS-Clk-RNAi, p=0.8358<br/> Tim&gt;GFP, p=0.4054.</p> <p>LNv&gt;GtACR1 vs:<br/> UAS-GtACR1 (from DN1a experiments), p=0.6823.<br/> DN1a&gt;GFP, p=0.9837.<br/> DN1a&gt;GtACR1, p&gt;0.9999.<br/> Tim&gt;Clk-RNAi, p=0.8443.<br/> UAS-Clk-RNAi, p&gt;0.9999..<br/> Tim&gt;GFP, p=0.9948.</p> <p>UAS-GtACR1 (from DN1a experiments) vs:<br/> DN1a&gt;GtACR1, p=0.2866.<br/> DN1a&gt;GFP, p=0.9922<br/> Tim&gt;Clk-RNAi, p=0.0139.<br/> UAS-Clk-RNAi, p=0.4602.<br/> Tim&gt;GFP, p=0.0965.</p> <p>DN1a&gt;GFP vs:<br/> DN1a&gt;GtACR1, p=0.8597.<br/> Tim&gt;Clk-RNAi, p=0.1327.<br/> UAS-Clk-RNAi, p=0.9212.<br/> Tim&gt;GFP, p=0.4974.</p> <p>DN1a&gt;GtACR1 vs:<br/> Tim&gt;Clk-RNAi, p=0.8524.<br/> UAS-Clk-RNAi, p&gt;0.9999.<br/> Tim&gt;GFP, p=0.9981.</p> <p>Tim&gt;Clk-RNAi vs:<br/> UAS-Clk-RNAi, p=0.9356.<br/> Tim&gt;GFP, p=0.9983.</p> |

|                                                |               |                                                                 |                                     |                                                                                                                                                             |
|------------------------------------------------|---------------|-----------------------------------------------------------------|-------------------------------------|-------------------------------------------------------------------------------------------------------------------------------------------------------------|
|                                                |               |                                                                 |                                     | UAS-Clk-RNAi vs Tim>GFP, p=0.9996.                                                                                                                          |
| Extended Data Fig. 11a, fourth column (black)  | UAS-GtACR1    | w <sup>+</sup> ; +/+; UAS-GtACR1::eYFP / +                      | 70 (2am) . Same flies as Figure 2c. | One-way ANOVA F(8,739)=2.557, p=0.0094, with Tukey's post hoc test.                                                                                         |
| Extended Data Fig. 11a, fifth column (grey)    | LNv > GFP     | w <sup>-</sup> ; Pdf-Gal4 / UAS-myr::GFP; Pdf-Gal4 / +          | 68 (2am) . Same flies as Figure 2c. | UAS-GtACR1 (from LNv experiments) vs: LNv>GFP, p=0.8765. LNv>GtACR1, p>0.9999.                                                                              |
| Extended Data Fig. 11a, sixth column (blue)    | LNv > GtACR1  | w <sup>-</sup> ; Pdf-Gal4 / +; Pdf-Gal4 / UAS-GtACR1::eYFP / +  | 61 (2am) . Same flies as Figure 2c. | UAS-GtACR1 (from DN1a experiments), p=0.5163. DN1a>GFP, p=0.9487. DN1a>GtACR1, p>0.9999. Tim>Clk-RNAi, p=0.8894. UAS-Clk-RNAi, p>0.9999. Tim>GFP, p=0.9983. |
| Extended Data Fig. 11a, seventh column (black) | UAS-GtACR1    | w <sup>+</sup> ; +/+; UAS-GtACR1::eYFP / +                      | 95 (2am). Same flies as Figure 2h.  | LNv>GFP vs: LNv>GtACR1, p=0.9431. UAS-GtACR1 (from DN1a experiments), p>0.9999. DN1a>GFP, p>0.9999.                                                         |
| Extended Data Fig. 11a, eighth column (grey)   | DN1a > GFP    | w <sup>-</sup> ; teashirt-Gal80 / UAS-myr::GFP; R23E05-Gal4 / + | 103 (2am). Same flies as Figure 2h. | DN1a>GtACR1, p=0.7552. Tim>Clk-RNAi, p=0.1099. UAS-Clk-RNAi, p=0.8358. Tim>GFP, p=0.4054.                                                                   |
| Extended Data Fig. 11a, ninth column (grey)    | DN1a > GtACR1 | w <sup>-</sup> ; teashirt-Gal80/+; R23E05-Gal4/UAS-GtACR1::eYFP | 112 (2am). Same flies as Figure 2h. | LNv>GtACR1 vs: UAS-GtACR1 (from DN1a experiments), p=0.6823. DN1a>GFP, p=0.9837. DN1a>GtACR1, p>0.9999.                                                     |
| Extended Data Fig. 11b, left, black            | UAS-GtACR1    | w <sup>+</sup> ; +/+; UAS-GtACR1::eYFP / +                      | 26                                  | Tim>Clk-RNAi, p=0.8443. UAS-Clk-RNAi, p>0.9999.. Tim>GFP, p=0.9948.                                                                                         |
| Extended Data Fig. 11b, left, grey             | LNv > GFP     | w <sup>-</sup> ; Pdf-Gal4/UAS-myr::GFP; Pdf-Gal4 / +            | 23                                  | UAS-GtACR1 (from DN1a experiments) vs: DN1a>GtACR1, p=0.2866. DN1a>GFP, p=0.9922.                                                                           |
| Extended Data Fig. 11b, left, blue             | LNv > GtACR1  | w <sup>-</sup> ; Pdf-Gal4 / +; Pdf-Gal4 / GtACR1::eYFP          | 23                                  | Tim>Clk-RNAi, p=0.0139. UAS-Clk-RNAi, p=0.4602. Tim>GFP, p=0.0965.                                                                                          |
|                                                |               |                                                                 |                                     | DN1a>GFP vs: DN1a>GtACR1, p=0.8597. Tim>Clk-RNAi, p=0.1327. UAS-Clk-RNAi, p=0.9212. Tim>GFP, p=0.4974.                                                      |



|  |  |  |  |                                                                                                                                                                                                                                                                                                                                                                                                                                                                                                                                                                                                                                                                                                                                                                                                                                                                                                                                                                                                                                                                                                                                                                                                                                                                                        |
|--|--|--|--|----------------------------------------------------------------------------------------------------------------------------------------------------------------------------------------------------------------------------------------------------------------------------------------------------------------------------------------------------------------------------------------------------------------------------------------------------------------------------------------------------------------------------------------------------------------------------------------------------------------------------------------------------------------------------------------------------------------------------------------------------------------------------------------------------------------------------------------------------------------------------------------------------------------------------------------------------------------------------------------------------------------------------------------------------------------------------------------------------------------------------------------------------------------------------------------------------------------------------------------------------------------------------------------|
|  |  |  |  | <p>DN1a&gt;GtACR1 vs:<br/>Tim&gt;Clk-RNAi, p=0.8524.<br/>UAS-Clk-RNAi, p&gt;0.9999.<br/>Tim&gt;GFP, p=0.9981.</p> <p>Tim&gt;Clk-RNAi vs:<br/>UAS-Clk-RNAi, p=0.9356.<br/>Tim&gt;GFP, p=0.9983.</p> <p>UAS-Clk-RNAi vs<br/>Tim&gt;GFP, p=0.9996.<br/>One-way ANOVA<br/>F(8,739)=16.15, p&lt;0.0001,<br/>with Tukey's post hoc test.</p> <p>UAS-GtACR1 (from LNv<br/>experiments) vs:<br/>LNv&gt;GFP, p&lt;0.0001.<br/>LNv&gt;GtACR1, p=0.9951.<br/>UAS-GtACR1 (from DN1a<br/>experiments), p&gt;0.9999.<br/>DN1a&gt;GFP, p&gt;0.9999 .<br/>DN1a&gt;GtACR1, p=0.0176.<br/>Tim&gt;Clk-RNAi, p&lt;0.0001.<br/>UAS-Clk-RNAi, p=0.9424.<br/>Tim&gt;GFP, p=0.6718.</p> <p>LNv&gt;GFP vs:<br/>LNv&gt;GtACR1, p=0.0034.<br/>UAS-GtACR1 (from DN1a<br/>experiments), p&lt;0.0001.<br/>DN1a&gt;GFP, p&lt;0.0001.<br/>DN1a&gt;GtACR1, p&lt;0.0001.<br/>Tim&gt;Clk-RNAi, p&lt;0.0001.<br/>UAS-Clk-RNAi, p&lt;0.0001.<br/>Tim&gt;GFP, p&lt;0.0001.</p> <p>LNv&gt;GtACR1 vs:<br/>UAS-GtACR1 (from DN1a<br/>experiments), p=0.9629.<br/>DN1a&gt;GFP, p=0.9983.<br/>DN1a&gt;GtACR1, p=0.0008.<br/>Tim&gt;Clk-RNAi, p&lt;0.0001.<br/>UAS-Clk-RNAi, p=0.5040.<br/>Tim&gt;GFP, p=0.1798.</p> <p>UAS-GtACR1 (from DN1a<br/>experiments) vs:<br/>DN1a&gt;GFP, p=0.0160<br/>Tim&gt;Clk-RNAi, p&lt;0.0001.</p> |
|--|--|--|--|----------------------------------------------------------------------------------------------------------------------------------------------------------------------------------------------------------------------------------------------------------------------------------------------------------------------------------------------------------------------------------------------------------------------------------------------------------------------------------------------------------------------------------------------------------------------------------------------------------------------------------------------------------------------------------------------------------------------------------------------------------------------------------------------------------------------------------------------------------------------------------------------------------------------------------------------------------------------------------------------------------------------------------------------------------------------------------------------------------------------------------------------------------------------------------------------------------------------------------------------------------------------------------------|

|                                      |               |                                                                 |                                        |                                                                                                                                                                                                                                                                                                                                                                                                                            |
|--------------------------------------|---------------|-----------------------------------------------------------------|----------------------------------------|----------------------------------------------------------------------------------------------------------------------------------------------------------------------------------------------------------------------------------------------------------------------------------------------------------------------------------------------------------------------------------------------------------------------------|
|                                      |               |                                                                 |                                        | <p>UAS-Clk-RNAi, p=0.9757.<br/>Tim&gt;GFP, p=0.7553.</p> <p>DN1a&gt;GFP vs:<br/>DN1a&gt;GtACR1, p=0.0016.<br/>Tim&gt;Clk-RNAi, p=0.8214.<br/>Tim&gt;GFP, p=0.4081.</p> <p>DN1a&gt;GtACR1 vs:<br/>Tim&gt;Clk-RNAi, p=0.2890.<br/>UAS-Clk-RNAi, p=0.5668.<br/>Tim&gt;GFP, p=0.8594.</p> <p>Tim&gt;Clk-RNAi vs:<br/>UAS-Clk-RNAi, p=0.0042.<br/>Tim&gt;GFP, p=0.0153.</p> <p>UAS-Clk-RNAi vs<br/>Tim&gt;GFP, p&gt;0.9999.</p> |
| Extended Data Fig. 11b, left, grey   | DN1a > GFP    | w <sup>-</sup> ; teashirt-Gal80 / UAS-myr::GFP; R23E05-Gal4 / + | 28                                     | One-way ANOVA F(8,739)=16.15, p<0.0001, with Tukey's post hoc test.                                                                                                                                                                                                                                                                                                                                                        |
| Extended Data Fig. 11b, left, green  | DN1a > GtACR1 | w <sup>-</sup> ; teashirt-Gal80/+; R23E05-Gal4/UAS-GtACR1::eYFP | 26                                     | UAS-GtACR1 (from LNV experiments) vs:<br>LNV>GFP, p<0.0001.<br>LNV>GtACR1, p=0.9951.                                                                                                                                                                                                                                                                                                                                       |
| Extended Data Fig. 11b, right, black | UAS-GtACR1    | w <sup>+</sup> ; +/+; UAS-GtACR1::eYFP / +                      | 70 (2am) .<br>Same flies as Figure 2c. | UAS-GtACR1 (from DN1a experiments), p>0.9999.<br>DN1a>GFP, p>0.9999 .<br>DN1a>GtACR1, p=0.0176.                                                                                                                                                                                                                                                                                                                            |
| Extended Data Fig. 11b, right, grey  | LNV > GFP     | w <sup>-</sup> ; Pdf-Gal4 / UAS-myr::GFP; Pdf-Gal4 / +          | 68 (2am) .<br>Same flies as Figure 2c. | Tim>Clk-RNAi, p<0.0001.<br>UAS-Clk-RNAi, p=0.9424.<br>Tim>GFP, p=0.6718.                                                                                                                                                                                                                                                                                                                                                   |
| Extended Data Fig. 11b, right, blue  | LNV > GtACR1  | w <sup>-</sup> ; Pdf-Gal4 / +; Pdf-Gal4 / UAS-GtACR1::eYFP / +  | 61 (2am) .<br>Same flies as Figure 2c. | LNV>GFP vs:<br>LNV>GtACR1, p=0.0034.<br>UAS-GtACR1 (from DN1a experiments), p<0.0001.                                                                                                                                                                                                                                                                                                                                      |
| Extended Data Fig. 11b, right, black | UAS-GtACR1    | w <sup>+</sup> ; +/+; UAS-GtACR1::eYFP / +                      | 95 (2am).<br>Same flies as Figure 2h.  | DN1a>GFP, p<0.0001.<br>DN1a>GtACR1, p<0.0001.<br>Tim>Clk-RNAi, p<0.0001.<br>UAS-Clk-RNAi, p<0.0001.<br>Tim>GFP, p<0.0001.                                                                                                                                                                                                                                                                                                  |
| Extended Data Fig. 11b, right, grey  | DN1a > GFP    | w <sup>-</sup> ; teashirt-Gal80 / UAS-myr::GFP; R23E05-Gal4 / + | 103 (2am).<br>Same flies as Figure 2h. | LNV>GtACR1 vs:<br>UAS-GtACR1 (from DN1a experiments), p=0.9629.                                                                                                                                                                                                                                                                                                                                                            |
| Extended Data Fig. Extended          | DN1a > GtACR1 | w <sup>-</sup> ; teashirt-Gal80/+; R23E05-                      | 112 (2am).<br>Same flies as Figure 2h. | DN1a>GFP, p=0.9983.<br>DN1a>GtACR1, p=0.0008.                                                                                                                                                                                                                                                                                                                                                                              |

|                                               |                |                                                              |   |                                                                                                                                                                                                                                                                                                                                                                                                                                                                                                                                                                                                                                                                                                                                                   |
|-----------------------------------------------|----------------|--------------------------------------------------------------|---|---------------------------------------------------------------------------------------------------------------------------------------------------------------------------------------------------------------------------------------------------------------------------------------------------------------------------------------------------------------------------------------------------------------------------------------------------------------------------------------------------------------------------------------------------------------------------------------------------------------------------------------------------------------------------------------------------------------------------------------------------|
| Data Fig. 11b, right, green                   |                | Gal4/UAS-GtACR1::eYFP                                        |   | Tim>Clk-RNAi, p<0.0001.<br>UAS-Clk-RNAi, p=0.5040.<br>Tim>GFP, p=0.1798.                                                                                                                                                                                                                                                                                                                                                                                                                                                                                                                                                                                                                                                                          |
| Extended Data Fig. 11c, first column (brown)  | GMR-hid        | w <sup>+</sup> ; GMR-hid[10]                                 | 8 | UAS-GtACR1 (from DN1a experiments) vs:<br>DN1a>GFP, p=0.0160<br>Tim>Clk-RNAi, p<0.0001.<br>UAS-Clk-RNAi, p=0.9757.<br>Tim>GFP, p=0.7553.                                                                                                                                                                                                                                                                                                                                                                                                                                                                                                                                                                                                          |
| Extended Data Fig. 11c, second column (black) | UAS-Clock-RNAi | w+;UAS-Clock-RNAi/+; UAS-Dicer2 / +                          | 8 | DN1a>GFP vs:<br>DN1a>GtACR1, p=0.0016.<br>Tim>Clk-RNAi, p=0.8214.<br>Tim>GFP, p=0.4081.                                                                                                                                                                                                                                                                                                                                                                                                                                                                                                                                                                                                                                                           |
| Extended Data Fig. 11c, third column (grey)   | Tim > GFP      | w-; Tim(UAS)-Gal4, Repo-Gal80 / UAS-myr::GFP; UAS-Dicer2 / + | 8 | DN1a>GtACR1 vs:<br>Tim>Clk-RNAi, p=0.2890.<br>UAS-Clk-RNAi, p=0.5668.<br>Tim>GFP, p=0.8594.<br><br>Tim>Clk-RNAi vs:<br>UAS-Clk-RNAi, p=0.0042.<br>Tim>GFP, p=0.0153.<br><br>UAS-Clk-RNAi vs<br>Tim>GFP, p>0.9999.<br>One-way ANOVA<br>F(3,28)=14.47, p<0.0001,<br>with Tukey's post hoc test.<br><br>GMR-hid vs:<br>UAS-Clk-RNAi, p<0.0001.<br>Tim>GFP, p<0.0001.<br>Tim>Clk-RNAi, p=0.0008.<br>UAS-GtACR1, p<0.0001.<br>LNv>GFP, p<0.0001.<br>LNv>GtACR1, p<0.0001.<br>DN1a>GFP, p<0.0001.<br>DN1a>GtACR1, p<0.0001.<br><br>UAS-Clk-RNAi vs:<br>Tim>GFP, p=0.9999.<br>Tim>Clk-RNAi, p=0.9878.<br>UAS-GtACR1, p=0.7868.<br>LNv>GFP, p>0.9999.<br>LNv>Gtacr1, p=0.9992.<br>DN1a>GFP, p>0.9999.<br>DN1a>GtACR1, p=0.9973.<br><br>Tim>Clock-RNAi vs: |

|                                              |                  |                                                                                      |   |                                                                                                                                                                                                                                                                                                                                                                                                                                                                                                                                 |
|----------------------------------------------|------------------|--------------------------------------------------------------------------------------|---|---------------------------------------------------------------------------------------------------------------------------------------------------------------------------------------------------------------------------------------------------------------------------------------------------------------------------------------------------------------------------------------------------------------------------------------------------------------------------------------------------------------------------------|
|                                              |                  |                                                                                      |   | <p>UAS-GtACR1, p =0.2117.<br/> LNv&gt;GFP, p=0.9956.<br/> DN1a&gt;GFP, p =0.9884.<br/> DN1a&gt;GtACR1, p=0.7247.</p> <p>UAS-GtACR1 vs:<br/> LNv&gt;GFP, p=0.7055.<br/> LNv&gt;GtACR1, p=0.9864.<br/> DN1a&gt;GFP, p=0.7830.<br/> DN1a&gt;GtACR1: p=0.9944.</p> <p>LNv&gt;GFP vs:<br/> LNv&gt;GtACR1, p=0.9970.<br/> DN1a&gt;GFP, p&gt;0.9999.<br/> DN1a&gt;GtACR1, p=0.9919.</p> <p>LNv&gt;GtACR1 vs:<br/> DN1a&gt;GFP: p=0.9992.<br/> DN1a&gt;GtACr1: p&gt;0.9990.</p> <p>DN1a&gt;GFP vs<br/> DN1a&gt;GtACR1: p&gt;0.9972.</p> |
| Extended Data Fig. 11c, fourth column (red)  | Tim > Clock-RNAi | w <sup>-</sup> ; Tim(UAS)-Gal4, Repo-Gal80 / UAS-Clock-RNAi; UAS-Dicer2 / UAS-Dicer2 | 8 | <p>One-way ANOVA<br/> F(3,28)=14.47, p&lt;0.0001, with Tukey's post hoc test.</p> <p>GMR-hid vs:<br/> UAS-Clk-RNAi, p&lt;0.0001.<br/> Tim&gt;GFP, p&lt;0.0001.<br/> Tim&gt;Clk-RNAi, p=0.0008.<br/> UAS-GtACR1, p&lt;0.0001.<br/> LNv&gt;GFP, p&lt;0.0001.<br/> LNv&gt;GtACR1, p&lt;0.0001.<br/> DN1a&gt;GFP, p&lt;0.0001.<br/> DN1a&gt;GtACR1, p&lt;0.0001.</p>                                                                                                                                                                |
| Extended Data Fig. 11c, fifth column (black) | UAS control      | w <sup>+</sup> ; +/+; UAS-GtACR1::eYFP / +                                           | 8 | <p>UAS-Clk-RNAi vs:<br/> Tim&gt;GFP, p=0.9999.<br/> Tim&gt;Clk-RNAi, p=0.9878.<br/> UAS-GtACR1, p=0.7868.<br/> LNv&gt;GFP, p&gt;0.9999.<br/> LNv&gt;Gtacr1, p=0.9992.<br/> DN1a&gt;GFP, p&gt;0.9999.<br/> DN1a&gt;GtACR1, p=0.9973.</p>                                                                                                                                                                                                                                                                                         |
| Extended Data Fig. 11c, sixth column (grey)  | GFP control      | w <sup>-</sup> ; Pdf-Gal4 / UAS-myr::GFP; Pdf-Gal4 / +                               | 8 | <p>Tim&gt;Clock-RNAi vs:<br/> UAS-GtACR1, p =0.2117.<br/> LNv&gt;GFP, p=0.9956.<br/> DN1a&gt;GFP, p =0.9884.<br/> DN1a&gt;GtACR1, p=0.7247.</p>                                                                                                                                                                                                                                                                                                                                                                                 |
| Extended Data Fig. 11c, seventh column (red) | LNv > GtACR1     | w <sup>-</sup> ; Pdf-Gal4 / +; Pdf-Gal4 / UAS-GtACR1::eYFP / +                       | 8 |                                                                                                                                                                                                                                                                                                                                                                                                                                                                                                                                 |
| Extended Data Fig. 11c, eighth column (grey) | GFP control      | w <sup>-</sup> ; teashirt-Gal80 / UAS-myr::GFP; R23E05-Gal4 / +                      | 8 |                                                                                                                                                                                                                                                                                                                                                                                                                                                                                                                                 |

|                                              |                                                  |                                                                                                          |                                                     |                                                                                                    |
|----------------------------------------------|--------------------------------------------------|----------------------------------------------------------------------------------------------------------|-----------------------------------------------------|----------------------------------------------------------------------------------------------------|
| Extended Data Fig. 11c, ninth column (green) | DN1a > GtACR1                                    | w <sup>-</sup> ; teashirt-Gal80/+; R23E05-Gal4/UAS-GtACR1::eYFP                                          | 8                                                   | UAS-GtACR1 vs: LNv>GFP, p=0.7055. LNv>GtACR1, p=0.9864. DN1a>GFP, p=0.7830. DN1a>GtACR1: p=0.9944. |
| Extended Data Fig. 12a                       |                                                  | w <sup>-</sup> ; teashirt-Gal80, PDF-LexA LexAop-myr::TdTomato; R23E05-Gal4/UAS-myr::GFP                 | Single confocal stack from Figure 3a                | LNv>GFP vs: LNv>GtACR1, p=0.9970. DN1a>GFP, p>0.9999. DN1a>GtACR1, p=0.9919.                       |
| Extended Data Fig. 12b                       |                                                  | w <sup>-</sup> ; UAS-myr::GFP.QUAS-mtdTomato-3xHA; teashirt-Gal80 / <i>trans</i> -Tango; R23E05-Gal4 / + | Single confocal stack from Figure 3c                | LNv>GtACR1 vs: DN1a>GFP, p=0.9992. DN1a>GtACr1: p>0.9990.                                          |
| Extended Data Fig. 12b                       |                                                  | w <sup>-</sup> ; UAS-myr::GFP.QUAS-mtdTomato-3xHA; teashirt-Gal80 / <i>trans</i> -Tango; R23E05-Gal4 / + | Single confocal stack from Figure 3c                | DN1a>GFP vs DN1a>GtACR1: p>0.9972.                                                                 |
| Extended Data Fig. 12c                       |                                                  | w <sup>-</sup> ; UAS-myr::GFP.QUAS-mtdTomato-3xHA; Pdf-Gal4 / <i>trans</i> -Tango; Pdf-Gal4/+            | Single confocal stack from Figure 3c                |                                                                                                    |
| Extended Data Fig. 13a, middle               | LNv-LexA; R23E05 > GCaMP                         | w <sup>-</sup> ; PDF-LexA / UAS-op-GCaMP6s; R23E05-Gal4 / LexAop-P2X <sub>2</sub>                        | Representative sample (2am). Same image as Fig. 3d. |                                                                                                    |
| Extended Data Fig. 13a right                 | LNv-LexA; R23E05 > GCaMP                         | w <sup>-</sup> ; PDF-LexA / UAS-op-GCaMP6s; R23E05-Gal4 / +                                              | Representative samples (2am).                       |                                                                                                    |
| Extended Data Fig. 13b, left                 | LNv > P2X <sub>2</sub> ; R23E05 > GCaMP (saline) | w <sup>-</sup> ; PDF-LexA / UAS-op-GCaMP6s; R23E05-Gal4 / LexAop-P2X <sub>2</sub>                        | 13 (2am). Individual trials from Figure 3e.         |                                                                                                    |
| Extended Data Fig. 13b, middle               | LNv-LexA; R23E05 > GCaMP                         | w <sup>-</sup> ; PDF-LexA / UAS-op-GCaMP6s; R23E05-Gal4 / +                                              | 12 (2am). Individual trials from Figure 3e.         |                                                                                                    |
| Extended Data Fig. 13b, right                | LNv > P2X <sub>2</sub> ;                         | w <sup>-</sup> ; PDF-LexA / UAS-op-GCaMP6s;                                                              | 12 (2am). Individual trials from Figure 3e.         |                                                                                                    |

|                                      |                                                  |                                                                                   |                                                     |                                        |
|--------------------------------------|--------------------------------------------------|-----------------------------------------------------------------------------------|-----------------------------------------------------|----------------------------------------|
|                                      | R23E05 > GCaMP                                   | R23E05-Gal4 / LexAop-P2X <sub>2</sub>                                             |                                                     |                                        |
| Extended Data Fig. 13c, middle       | R23E05-LexA; LNV > GCaMP                         | w <sup>-</sup> ; Pdf-Gal4 / UAS-op-GCaMP6s; R23E05-LexA / +                       | Representative sample (2pm). Same image as Fig. 3d. |                                        |
| Extended Data Fig. 13c, right        | R23E05-LexA LNV > GCaMP                          | w <sup>-</sup> ; Pdf-Gal4 / UAS-op-GCaMP6s; R23E05-LexA / +                       | Representative samples (2pm).                       |                                        |
| Extended Data Fig. 13d, left         | R23E05-LexA; LNV > GCaMP                         | w <sup>-</sup> ; Pdf-Gal4 / UAS-op-GCaMP6s; R23E05-LexA / +                       | 13 (2pm). Individual trials from Figure 3f.         |                                        |
| Extended Data Fig. 13d, middle       | R23E05 > P2X <sub>2</sub> ; LNV > GCaMP (saline) | w <sup>-</sup> ; Pdf-Gal4 / UAS-op-GCaMP6s; R23E05-LexA / LexAop-P2X <sub>2</sub> | 13 (2pm). Individual trials from Figure 3f.         |                                        |
| Extended Data Fig. 13d, right        | R23E05 > P2X <sub>2</sub> ; LNV > GCaMP          | w <sup>-</sup> ; Pdf-Gal4 / UAS-op-GCaMP6s; R23E05-LexA / LexAop-P2X <sub>2</sub> | 14 (2pm). Individual trials from Figure 3f.         |                                        |
| Extended Data Fig. 14a, left         | PDF-LexA > LexAop-Myr::GFP                       | w <sup>-</sup> ; PDFLexA / +; 13xLexAop2-IVS-Myr::GFP / +                         | Representative sample of nine flies                 |                                        |
| Extended Data Fig. 14a, middle       | R23E05-LexA > LexAop-Myr::GFP                    | w <sup>-</sup> ; +/+; R23E05-LexA / 13xLexAop2-IVS-Myr::GFP / +                   | Representative sample of ten flies                  |                                        |
| Extended Data Fig. 14a, right, blue  |                                                  | w <sup>-</sup> ; PDFLexA / +; 13xLexAop2-IVS-Myr::GFP / +                         | 9                                                   | Unpaired t-test t(17)=10.34, p<0.0001. |
| Extended Data Fig. 14a, right, green |                                                  | w <sup>-</sup> ; +/+; R23E05-LexA / 13xLexAop2-IVS-Myr::GFP / +                   | 10                                                  |                                        |
| Extended Data Fig. 15a               | LNv > GFP, Brp                                   | w <sup>-</sup> ; Pdf-Gal4 / UAS-my::GFP; Pdf-Gal4 / UAS-brp-D3::mCherry           | 30 (same flies as Figure 4A, pooled 2pm and 2am)    | Pearson correlation r=0.83, p<0.0001.  |
| Extended Data Fig. 15b               | DN1a > GFP, Brp                                  | w <sup>-</sup> ; teashirt-Gal80 / UAS-my::GFP; R23E05-Gal4 / UAS-brp-D3::mCherry  | 57 (same flies as Figure 4B, pooled 2pm and 2am)    | Pearson correlation r=0.46, p=0.0004.  |

|                          |              |                                                        |                                                               |  |
|--------------------------|--------------|--------------------------------------------------------|---------------------------------------------------------------|--|
| Extended Data Fig. 16a   | UAS-Rho1     | $w^+$ ; +/+; UAS-Rho1.Sph / +                          | 24                                                            |  |
| Extended Data Fig. 16a   | LNv > GFP    | $w^-$ ; Pdf-Gal4 / UAS-myr::GFP; Pdf-Gal4 / +          | 24                                                            |  |
| Extended Data Fig. 16a   | LNv > Kir2.1 | $w^-$ ; Pdf-Gal4 / UAS-Kir2.1; Pdf-Gal4 / +            | 17                                                            |  |
| Extended Data Fig. 16a   | LNv > Rho1   | $w^-$ ; Pdf-Gal4 / + ; Pdf-Gal4 / UAS-Rho1.Sph         | 22                                                            |  |
| Extended Data Fig. 16a   | DN1a > GFP   | $w^-$ ; teashirt-Gal80 / UAS-myr::GFP; R23E05-Gal4/+   | 24                                                            |  |
| Extended Data Fig. 16a   | DN1a > Rho1  | $w^-$ ; teashirt-Gal80 / +; R23E05-Gal4 / UAS-Rho1.Sph | 21                                                            |  |
| Extended Data Fig. 17a   | Wild-type    | $w^+$ , <i>iso31</i>                                   | 44 (same animals as Table S2, aside from 2 deceased animals). |  |
| Extended Data Fig. 17b   | Wild-type    | $w^+$ , <i>iso31</i>                                   | 46 (same flies as Table S2)                                   |  |
| Extended Data Fig. 17c,d | Wild-type    | $w^+$ , <i>iso31</i>                                   | 29 (6am), 29 (8am), 32 (10am), 26 (6pm), 27 (8pm), 26 (20pm)  |  |

983  
984

**Extended Data Table 2. Circadian rhythmicity during the first four days in darkness**

| Genotype                     | N  | % Rhythmic after 4 days in darkness | Tau (S.E.M.) | Power (S.E.M.) |
|------------------------------|----|-------------------------------------|--------------|----------------|
| $w^+$ , <i>iso31</i>         | 46 | 100                                 | 23.9 (0.12)  | 71.9 (1.7)     |
| UAS-Clock-RNAi               | 23 | 100                                 | 23.8 (0.12)  | 74 (2.44)      |
| Tim > GFP                    | 24 | 100                                 | 23.6 (0.1)   | 86.3 (2.33)    |
| Tim > Clock-RNAi             | 22 | 9.1                                 | 17.8 (0.75)  | 22.7 (2.55)    |
| UAS-Period-RNAi              | 23 | 100                                 | 24.7 (0.13)  | 71.9 (1.7)     |
| Tim > Period-RNAi            | 24 | 0                                   | ****         | ****           |
| $w^+$ <i>per<sup>S</sup></i> | 19 | 94.7                                | 18.9 (0.05)  | 69.8 (4.82)    |

|                                            |    |      |             |               |
|--------------------------------------------|----|------|-------------|---------------|
| UAS-GtACR1                                 | 20 | 95   | 23.6 (0.06) | 68.2 (4.91)   |
| LNv > GFP                                  | 24 | 100  | 24.3 (0.16) | 71 (2.47)     |
| LNv > GtACR1                               | 21 | 52.4 | 23.8 (0.31) | 53.8 (5.3)    |
| UAS-Kir2.1                                 | 20 | 94.4 | 23.7(0.15)  | 74.7 (3.52)   |
| LNv > Kir2.1                               | 17 | 70.6 | 23 (0.13)   | 66.7 (5.71)   |
| DN1a > GFP                                 | 25 | 84   | 23.8 (0.11) | 56 (4.59)     |
| DN1a > GtACR1                              | 19 | 78.9 | 23.9 (0.23) | 37.8 (3.49)   |
| <i>han</i> <sup>3369</sup> ; UAS-PDFR16    | 14 | 57.1 | 23.4 (0.48) | 52.9 (7.09)   |
| <i>han</i> <sup>5304</sup> ; UAS-PDFR16    | 17 | 70.6 | 23.1 (0.21) | 46.2 (5.56)   |
| <i>han</i> <sup>3369</sup> ; DN1a > PDFR16 | 10 | 90   | 23.4 (0.15) | 66 (7.86)     |
| <i>han</i> <sup>5304</sup> ; DN1a > PDFR16 | 17 | 100  | 22.9 (0.12) | 84.1 (3.82)   |
| UAS-tethered PDF                           | 22 | 95.5 | 23.5 (0)    | 87.5 (3.79)   |
| DN1a > tethered PDF                        | 21 | 100  | 23.5 (0.02) | 87.8 (3)      |
| UAS-Rho1                                   | 24 | 95.8 | 23.7 (0.09) | 72.2 (3.26)   |
| LNv > Rho1                                 | 22 | 90.9 | 24.8 (0.28) | 52 (2.74)     |
| DN1a > Rho1                                | 21 | 95.2 | 23.5 (0.07) | 71.5.4 (3.95) |
| UAS-Rho1-RNAi                              | 24 | 95.8 | 23.9 (0.13) | 73.8 (3.56)   |
| LNv > GFP (with Dicer2)                    | 22 | 100  | 24 (0.16)   | 70.1 (2.43)   |
| LNv > Rho1-RNAi (with Dicer2)              | 15 | 66.7 | 23.6 (0.16) | 55 (6.19)     |
| R23E05 > GFP (with Dicer2)                 | 24 | 100  | 23.5 (0)    | 81.8 (4.79)   |
| R23E05 > Rho1-RNAi (with Dicer2)           | 25 | 72   | 23.9 (0.17) | 60.2 (6.29)   |

985

986

**Extended Data Table 3. Selected results from PDFR screen**

| Gal4 Line                                                                   | Change in locomotor activity | Expression pattern | Expression in DN1a |
|-----------------------------------------------------------------------------|------------------------------|--------------------|--------------------|
| <b>All hits (activity decreased by light. <math>\Delta</math> below 0.)</b> |                              |                    |                    |
| R23E05-Gal4                                                                 | -18.0                        | This paper         | Yes                |
| R23E05-Gal4 + tsh Gal80 (data not shown in 2D)                              | -16.0                        | This paper         | Yes                |
| Trojan VGLUT-Gal4                                                           | -17.3                        | Glutamatergic      | Unknown            |



|                                                                                                        |       |                                                                                 |         |
|--------------------------------------------------------------------------------------------------------|-------|---------------------------------------------------------------------------------|---------|
| VGLUT-Gal4 (data not shown in 2D because redundancy with Trojan VGLUT-Gal4)                            | -35.9 | Glutamatergic                                                                   | Unknown |
| DDC-Gal4                                                                                               | -15.5 | Serotonergic and dopaminergic                                                   | Unknown |
| Gad-Gal4                                                                                               | -14.6 | GABAergic                                                                       | Unknown |
| R78H08-Gal4                                                                                            | -13.9 | Available on FlyLight                                                           | Unknown |
| R94G04-Gal4                                                                                            | -10.9 | Available on FlyLight                                                           | Unknown |
| R94C05-Gal4                                                                                            | -10.8 | Available on FlyLight                                                           | Unknown |
| VGAT-Gal4                                                                                              | -8.9  | GABAergic                                                                       | Unknown |
| 207324VT-Gal4                                                                                          | -6.1  | Putative PDFR expressing                                                        | Unknown |
| TM5c-Gal4 (Ortc1a-Gal4::DBD; Vglut-Gal4::AD)                                                           | -5.1  | Glutamatergic neurons in optic lobe                                             | Unknown |
| 200573VT-Gal4                                                                                          | -4.6  | DN1a, some DN1p (canonical LNV target), some LND (canonical LNV target)         | Yes     |
| Mai179-Gal4; PDF-Gal80                                                                                 | -4.6  | DN1a, LNDs (canonical LNV target)                                               | Yes     |
| C929-Gal4                                                                                              | -4.5  | Peptidergic neurons, including I-LNVs                                           | Unknown |
| R85C03-Gal4                                                                                            | -4.2  | Available on FlyLight                                                           | Unknown |
| R17C09-Gal4                                                                                            | -3.5  | Available on FlyLight                                                           | Unknown |
| C217-Gal4                                                                                              | -3.0  | Available on FlyLight                                                           | Unknown |
| R38E07-Gal4                                                                                            | 5.8   | Available on FlyLight                                                           | Unknown |
| Elav-Gal4                                                                                              | -2.0  | Pan-neuronal                                                                    | Unknown |
| 200112VT-Gal4                                                                                          | -1.6  | Putative PDFR-expressing                                                        | Unknown |
| R13B08-Gal4                                                                                            | -1.6  | Available on FlyLight                                                           | Unknown |
| NPF-Gal4                                                                                               | -1.1  | Neuropeptide F-expressing                                                       | Unknown |
| R22E12-Gal4                                                                                            | -1.1  | Available on FlyLight                                                           | Unknown |
| R51B02-Gal4                                                                                            | -0.7  | Available on FlyLight                                                           | Unknown |
| <b>Canonical LNV-targets, broad neurotransmitter lines and regions controlling locomotor activity.</b> |       |                                                                                 |         |
| R18H11-Gal4                                                                                            | 3.1   | DN1a and DN1p (canonical s-LNV target)                                          | Yes     |
| Cry-Gal4-Gal4                                                                                          | 6.6   | DN1a, LNVs, some DN1ps (canonical LNV target), some LNDs (canonical LNV target) | Yes     |
| R6-Gal4-Gal4                                                                                           | 9.9   | s-LNV (Canonical I-LNV target)                                                  | Unknown |

987

988

989 **Extended Data Table 4. Sources of fly stocks used in this paper**

| <i>Drosophila melanogaster</i>            | Source                                                            | Stock Number |
|-------------------------------------------|-------------------------------------------------------------------|--------------|
| <i>iso31</i>                              | Ryder et al., Genetics, 2004                                      |              |
| <i>Canton S</i>                           | Barry Dickson (via Michael Crickmore)                             |              |
| UAS-myr::GFP (attP2)                      | BDSC (Bloomington Drosophila Stock Center) 32197 (via Matt Pecot) |              |
| UAS-myr::GFP (attP40)                     | BDSC 32198                                                        |              |
| Tim(UAS)-Gal4                             | Blau and Young, Cell, 1999 (Flybase:FBtp0011839)                  |              |
| UAS-Dicer2 (X)                            | BDSC 24646                                                        |              |
| UAS-Dicer2 (2)                            | BDSC 24650                                                        |              |
| UAS-Dicer2 (3)                            | BDSC 24651                                                        |              |
| repo-Gal80                                | Awasaki et al., J. Neurosci, 2008 (Flybase:FBtp0067904)           |              |
| UAS-Clock-RNAi                            | Vienna Drosophila Resource Center VDRC (VDRC)                     | 107576KK     |
| UAS-Period-RNAi                           | Fly Stocks of National Institutes of Genetics (via Michael Young) | 2647R-1      |
| <i>w<sup>+</sup>per<sup>S</sup></i>       | Jeffrey Price                                                     |              |
| <i>yw</i> ; PDF-Gal4; PDF-Gal4 (LNv-Gal4) | Justin Blau                                                       |              |
| UAS-GtACR1::eYFP                          | Adam Claridge-Chang (via Michael Crickmore)                       |              |
| UAS-ChR2-XXM                              | Robert Kittel (via Michael Crickmore)                             |              |
| R23E05-Gal4                               | BDSC                                                              | BDSC_49029   |
| UAS-ChR2-XXL                              | BDSC                                                              | BDSC_58374   |
| <i>trans</i> -Tango                       | BDSC                                                              | BDSC_77124   |
| <i>pdf<sup>Han3369</sup></i>              | Laboratory of Paul Taghert                                        |              |
| <i>pdf<sup>Han5304</sup></i>              | Laboratory of Paul Taghert                                        |              |
| UAS-Pdfr-16                               | Laboratory of Paul Taghert                                        |              |
| UAS-Denmark                               | BDSC                                                              | BDSC_33062   |

|                          |                                                                       |            |
|--------------------------|-----------------------------------------------------------------------|------------|
| PDF-LexA                 | Shang et al., PNAS, 2008 (Flybase: FBtp0093323)                       |            |
| LexAop-myr::tdTom        | Laboratory of Matt Pecot ( <a href="#">Chen et al., 2014</a> )        |            |
| LexAop-syt::GDP::HA      | BDSC                                                                  | BDSC_62142 |
| UAS-opGCaMP6s            | Laboratory of David Anderson (via Michael Crickmore)                  |            |
| UAS-tdTomato             | BDSC 36327                                                            |            |
| LexAop-P2X2              | Laboratory of Orié Shafer (via Rachel Wilson)                         |            |
| UAS-brp-D3::mCherry      | Christiansen et al., J. Neurosci, 2011 (Flybase: FBtp0069949)         |            |
| <i>per</i> <sup>01</sup> | Konopka and Benzer, PNAS, 1971 (Flybase: FBal0013649)                 |            |
| UAS-Rho1.Sph             | BDSC                                                                  | BDSC_7334  |
| UAS-Rho1-RNAi            | BDSC                                                                  | BDSC_9909  |
| R6-Gal4                  | Helfrich-Forster et al., J. Comp. Neurol., 2007 (Flybase FBti0016844) |            |
| JRC_SS00645              | Laboratory of Gerry Rubin                                             |            |
| C929-Gal4                | BDSC                                                                  | BDSC_9909  |
| JRC_SS00681              | Laboratory of Gerry Rubin                                             |            |
| UAS- PDF-RNAi            | VDRRC                                                                 | 4380       |
| UAS-10x UAS t-PDF        | Laboratory of Michael Nitabach                                        |            |
| R23E05-Gal4              | BDSC                                                                  | BDSC_49029 |
| R23E05-LexA              | This paper                                                            |            |
| R23E05-Gal80             | This paper                                                            |            |
| UAS-RedStinger           | BDSC                                                                  | BDSC_8546  |
| PDF-Gal80                | Stoleru et al., Nature, 2004 (Flybase: Fbtp0019042)                   |            |
| LexAop-myr::GFP          | BDSC (via Matt Pecot)                                                 | BDSC_32209 |
| Vglut-Gal4 (OK371)       | BDSC                                                                  | BDSC_26160 |

|                 |                                    |            |
|-----------------|------------------------------------|------------|
| GMR-hid[10]     | Laboratory of<br>Andreas Bergmann  |            |
| UAS-mGluRA-RNAi | BDSC                               | BDSC_34872 |
| UAS-CCHa1-RNAi  | VDRC                               | 104794KK   |
| UAS-CCHa1R-RNAi | VDRC                               | 103055KK   |
| UAS-mCD8::GFP   | Laboratory of<br>Michael Crickmore |            |
| UAS-Kir2.1      | Laboratory of<br>Michael Crickmore |            |

990
